# Supplementary material for: REST reduction is essential for hypoxia-induced neuroendocrine differentiation of prostate cancer cells by activating autophagy signaling
Source: PubMed Central journal article supplement (PMC5041970; doi:10.18632/oncotarget.8433), 2016-03-28
Supplement: oncotarget-07-26137-s001.pdf [file oncotarget-07-26137-s001.pdf]

## REST reduction is essential for hypoxia-induced neuroendocrine differentiation of prostate cancer cells by activating autophagy signaling

### Supplementary Materials

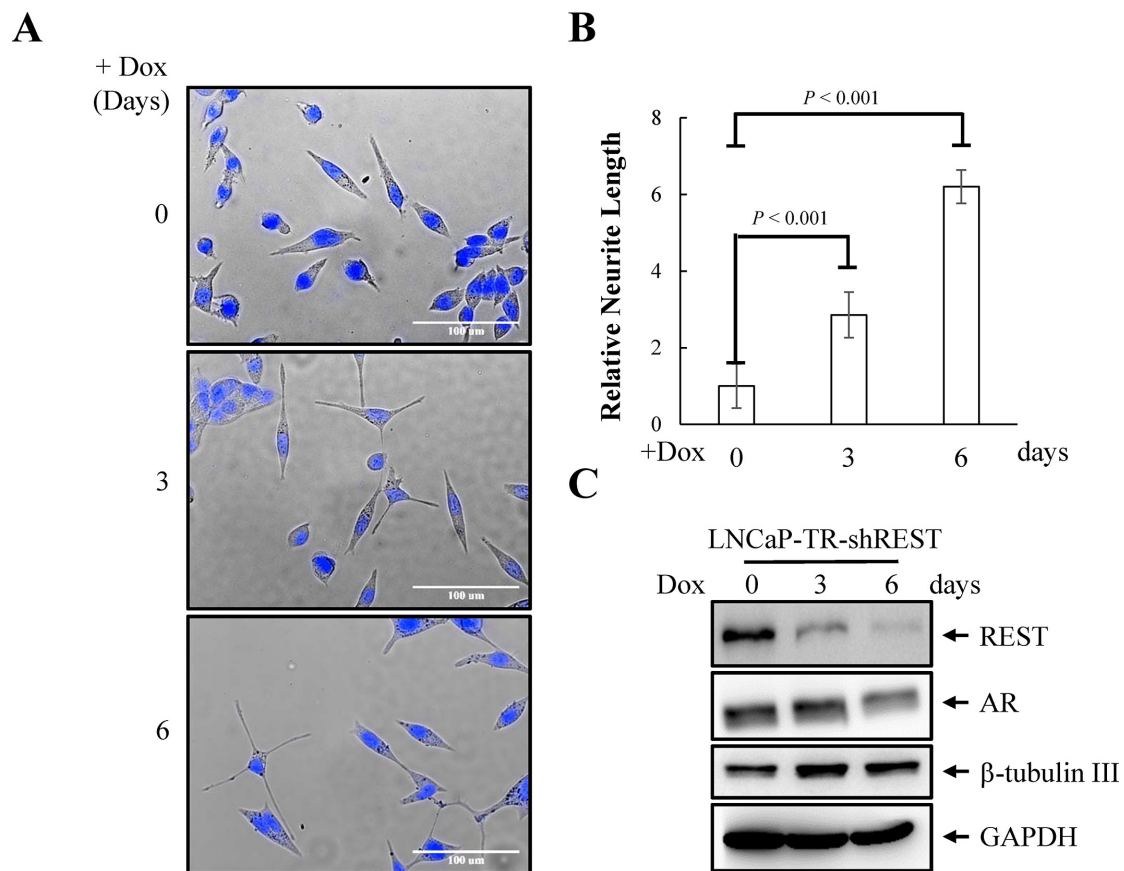

**Supplementary Figure S1: REST down-regulation promotes NED progression.** (A) LNCaP-TR-shREST cells were treated with 1  $\mu\text{g/ml}$  Dox for 0, 3 and 6 days to knockdown REST. Representative photos of control and Dox-treated cells stained with Hoechst. (B) Neurite lengths were quantified by the average from 10 microscopic fields; bars, SD. (C) The expression of REST, AR and  $\beta$ -tubulin III in LNCaP-TR-shREST cells under Dox treatment as described in (A) was analyzed by immunoblotting. GAPDH was used as the loading control.

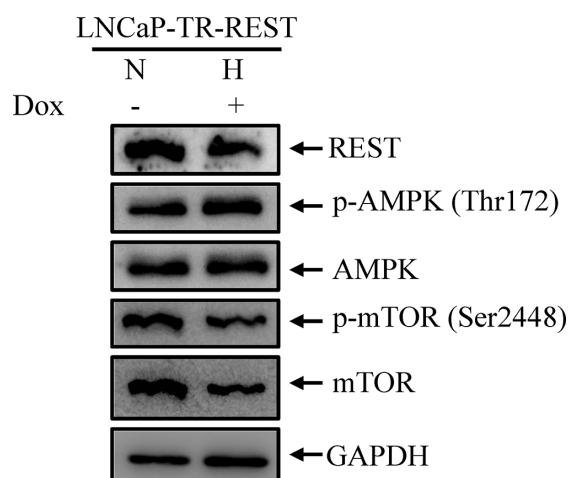

**Supplementary Figure S2: Comparable phospho-AMPK and phospho-mTOR levels in hypoxia condition overexpressing REST and normoxia.** Ectopic expression of REST during hypoxia restores phospho-AMPK and phospho-mTOR to normoxic levels. LNCaP-TR-REST cells were treated with 0.001  $\mu\text{g/ml}$  Dox to overexpress REST in hypoxia for 3 days (right lane). Cells under normoxia conditions were also collected (left lane). TLCs were analyzed by immunoblotting using anti-REST, anti-p-AMPK, and anti-p-mTOR antibodies. Total AMPK and mTOR are used as controls. GAPDH was used as loading control.

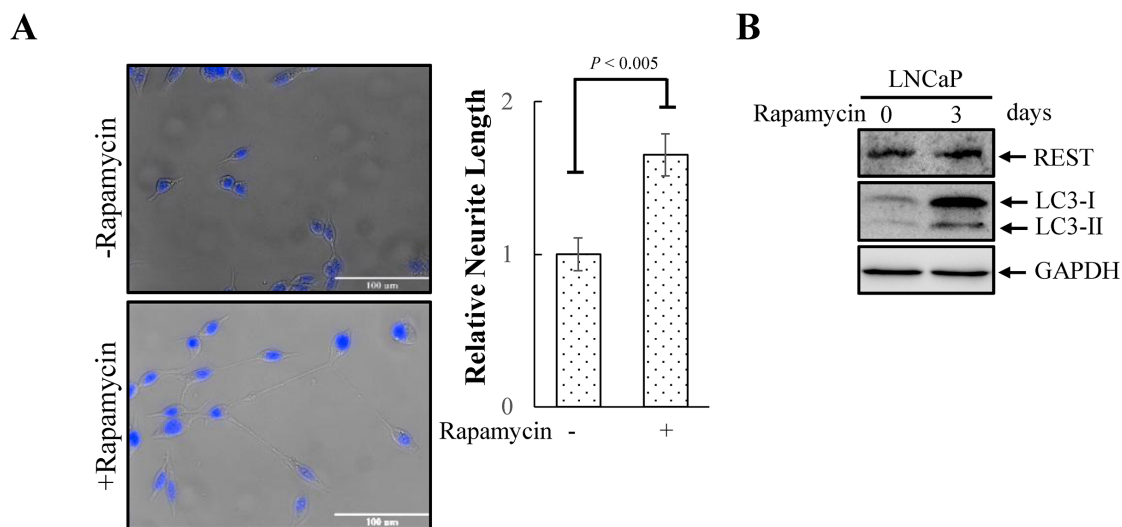

**Supplementary Figure S3: Chemical inhibition of mTOR by rapamycin activated NED and autophagy but did not reduce REST expression in LNCaP cells.** (A) LNCaP cells were treated with rapamycin for 3 days. Representative photos of control and rapamycin-treated cells were stained with Hoechst (left panel). The induced neurite length was assessed using brightfield microscopy images (40 $\times$  magnification) and quantified by the average from 10 microscopic fields; bars, SD (right panel). (B) TLCs prepared from LNCaP cells treated as described in (A) were analyzed by immunoblotting using anti-REST and anti-LC3 antibodies. GAPDH was used as loading control.

**Supplementary Table S1: Hypoxia up M**

| LNCaP           |             |         |         |             |
|-----------------|-------------|---------|---------|-------------|
| Gene ID         | Gene Symbol | 10% FBS | Hypoxia | Fold change |
| ENSG00000183044 | ABAT        | 4.32    | 9.83    | 2.27        |
| ENSG00000107331 | ABCA2       | 7.35    | 11.20   | 1.52        |
| ENSG00000115657 | ABCB6       | 0.77    | 1.38    | 1.78        |
| ENSG00000167315 | ACAA2       | 0.78    | 2.22    | 2.86        |
| ENSG00000131584 | ACAP3       | 3.67    | 7.56    | 2.06        |
| ENSG00000176244 | ACBD7       | 1.99    | 4.45    | 2.23        |
| ENSG00000114739 | ACVR2B      | 2.13    | 3.72    | 1.75        |
| ENSG00000119640 | ACYPI       | 2.53    | 5.09    | 2.01        |
| ENSG00000073670 | ADAM11      | 1.55    | 2.64    | 1.70        |
| ENSG00000154734 | ADAMTS1     | 11.28   | 42.92   | 3.81        |
| ENSG00000156218 | ADAMTSL3    | 3.40    | 5.19    | 1.52        |
| ENSG00000143382 | ADAMTSL4    | 0.82    | 2.25    | 2.75        |
| ENSG00000152990 | GPR125      | 3.67    | 5.52    | 1.50        |
| ENSG00000162688 | AGL         | 4.43    | 6.84    | 1.54        |
| ENSG00000134698 | EIF2C4      | 8.28    | 15.88   | 1.92        |
| ENSG00000155189 | AGPAT5      | 19.14   | 47.77   | 2.50        |
| ENSG00000186063 | AIDA        | 45.73   | 70.86   | 1.55        |
| ENSG00000162433 | AK4         | 37.44   | 78.31   | 2.09        |
| ENSG00000131016 | AKAP12      | 0.89    | 39.69   | 44.80       |
| ENSG00000127914 | AKAP9       | 2.64    | 4.84    | 1.83        |
| ENSG00000085662 | AKR1B1      | 1.28    | 1.96    | 1.54        |
| ENSG00000170017 | ALCAM       | 32.16   | 52.79   | 1.64        |
| ENSG00000149925 | ALDOA       | 180.51  | 531.40  | 2.94        |
| ENSG00000109107 | ALDOC       | 13.42   | 51.27   | 3.82        |
| ENSG00000139133 | ALG10       | 3.83    | 6.95    | 1.81        |
| ENSG00000175548 | ALG10B      | 5.12    | 8.27    | 1.62        |
| ENSG00000136383 | ALPK3       | 2.38    | 7.40    | 3.11        |
| ENSG00000242110 | AMACR       | 12.11   | 33.69   | 2.78        |
| ENSG00000176020 | AMIGO3      | 0.00    | 1.62    | 1622541.30  |
| ENSG00000145020 | AMT         | 0.74    | 1.49    | 2.00        |
| ENSG00000240038 | AMY2B       | 0.79    | 1.23    | 1.57        |
| ENSG00000110200 | ANAPC15     | 1.54    | 2.62    | 1.70        |
| ENSG00000091879 | ANGPT2      | 3.49    | 33.97   | 9.72        |
| ENSG00000166839 | ANKDD1A     | 1.89    | 3.07    | 1.62        |
| ENSG00000088448 | ANKRD10     | 6.84    | 10.61   | 1.55        |
| ENSG00000198720 | ANKRD13B    | 5.40    | 9.24    | 1.71        |

|                 |             |       |       |      |
|-----------------|-------------|-------|-------|------|
| ENSG00000163126 | ANKRD23     | 0.47  | 1.15  | 2.45 |
| ENSG00000135976 | ANKRD36     | 0.89  | 1.96  | 2.21 |
| ENSG00000186352 | ANKRD37     | 3.48  | 11.36 | 3.26 |
| ENSG00000163516 | ANKZF1      | 9.81  | 28.69 | 2.93 |
| ENSG00000011426 | ANLN        | 6.12  | 16.90 | 2.76 |
| ENSG00000146205 | ANO7        | 0.60  | 1.96  | 3.28 |
| ENSG00000182287 | AP1S2       | 1.52  | 3.40  | 2.23 |
| ENSG00000120868 | APAF1       | 2.24  | 3.52  | 1.58 |
| ENSG00000113108 | APBB3       | 2.73  | 4.63  | 1.70 |
| ENSG00000171388 | APLN        | 4.72  | 41.36 | 8.76 |
| ENSG00000105290 | APLP1       | 14.56 | 29.76 | 2.04 |
| ENSG00000198576 | ARC         | 0.17  | 1.66  | 9.81 |
| ENSG00000198826 | ARHGAP11A   | 5.34  | 12.09 | 2.26 |
| ENSG00000088756 | ARHGAP28    | 2.65  | 7.94  | 3.00 |
| ENSG00000004777 | ARHGAP33    | 3.05  | 4.83  | 1.58 |
| ENSG00000047648 | ARHGAP6     | 6.22  | 11.13 | 1.79 |
| ENSG00000242173 | ARHGDIG     | 3.15  | 7.02  | 2.23 |
| ENSG00000104728 | ARHGEF10    | 3.35  | 7.16  | 2.14 |
| ENSG00000240771 | ARHGEF25    | 2.00  | 3.31  | 1.66 |
| ENSG00000183111 | ARHGEF37    | 9.40  | 19.17 | 2.04 |
| ENSG00000137135 | ARHGEF39    | 2.32  | 3.99  | 1.72 |
| ENSG00000116017 | ARID3A      | 3.75  | 7.34  | 1.96 |
| ENSG00000179361 | ARID3B      | 1.98  | 3.31  | 1.67 |
| ENSG00000196843 | ARID5A      | 7.39  | 11.92 | 1.61 |
| ENSG00000172379 | ARNT2       | 2.96  | 4.48  | 1.51 |
| ENSG00000250151 | ARPC4-TTLL3 | 5.86  | 10.55 | 1.80 |
| ENSG00000105011 | ASF1B       | 8.16  | 18.22 | 2.23 |
| ENSG00000066279 | ASPM        | 0.59  | 1.92  | 3.24 |
| ENSG00000156802 | ATAD2       | 4.84  | 10.42 | 2.15 |
| ENSG00000176208 | ATAD5       | 1.11  | 3.46  | 3.10 |
| ENSG00000137343 | ATAT1       | 4.11  | 8.44  | 2.06 |
| ENSG00000101974 | ATP11C      | 2.29  | 4.83  | 2.11 |
| ENSG00000169020 | ATP5I       | 0.96  | 2.88  | 3.01 |
| ENSG00000143515 | ATP8B2      | 2.42  | 4.73  | 1.96 |
| ENSG00000085224 | ATRX        | 4.82  | 8.41  | 1.75 |
| ENSG00000178999 | AURKB       | 3.24  | 7.34  | 2.26 |
| ENSG00000158321 | AUTS2       | 0.78  | 1.49  | 1.91 |
| ENSG00000182272 | B4GALNT4    | 20.07 | 30.63 | 1.53 |
| ENSG00000043039 | BARX2       | 0.36  | 1.01  | 2.79 |

|                 |           |        |        |      |
|-----------------|-----------|--------|--------|------|
| ENSG00000103507 | BCKDK     | 22.52  | 36.76  | 1.63 |
| ENSG00000161267 | BDH1      | 6.23   | 9.86   | 1.58 |
| ENSG00000145734 | BDP1      | 17.94  | 38.28  | 2.13 |
| ENSG00000134107 | BHLHE40   | 15.98  | 68.90  | 4.31 |
| ENSG00000023445 | BIRC3     | 1.28   | 1.99   | 1.56 |
| ENSG00000089685 | BIRC5     | 17.46  | 33.17  | 1.90 |
| ENSG00000197299 | BLM       | 0.86   | 2.04   | 2.38 |
| ENSG00000138696 | BMPR1B    | 12.76  | 22.83  | 1.79 |
| ENSG00000102010 | BMX       | 0.37   | 1.68   | 4.57 |
| ENSG00000176171 | BNIP3     | 49.55  | 244.89 | 4.94 |
| ENSG00000104765 | BNIP3L    | 48.02  | 145.80 | 3.04 |
| ENSG00000012048 | BRCA1     | 2.65   | 5.30   | 2.00 |
| ENSG00000139618 | BRCA2     | 0.87   | 2.61   | 2.99 |
| ENSG00000136492 | BRIP1     | 0.76   | 2.79   | 3.66 |
| ENSG00000165288 | BRWD3     | 1.15   | 1.95   | 1.70 |
| ENSG00000133639 | BTG1      | 192.29 | 304.90 | 1.59 |
| ENSG00000159388 | BTG2      | 22.54  | 37.08  | 1.64 |
| ENSG00000169679 | BUB1      | 1.33   | 2.29   | 1.73 |
| ENSG00000156970 | BUB1B     | 7.84   | 21.23  | 2.71 |
| ENSG00000173088 | C10orf131 | 0.65   | 1.12   | 1.71 |
| ENSG00000168005 | C11orf84  | 10.24  | 15.94  | 1.56 |
| ENSG00000227051 | C14orf132 | 1.81   | 4.77   | 2.64 |
| ENSG00000162062 | C16orf59  | 3.93   | 7.00   | 1.78 |
| ENSG00000125319 | C17orf53  | 0.94   | 1.46   | 1.56 |
| ENSG00000214226 | C17orf67  | 1.35   | 2.06   | 1.53 |
| ENSG00000132016 | C19orf57  | 0.71   | 2.07   | 2.94 |
| ENSG00000130813 | C19orf66  | 3.11   | 4.66   | 1.50 |
| ENSG00000131591 | C1orf159  | 1.60   | 2.92   | 1.82 |
| ENSG00000118292 | C1orf54   | 2.11   | 3.28   | 1.56 |
| ENSG00000082196 | C1QTNF3   | 0.67   | 3.27   | 4.85 |
| ENSG00000133466 | C1QTNF6   | 1.69   | 3.14   | 1.86 |
| ENSG00000205863 | C1QTNF9B  | 1.21   | 1.94   | 1.61 |
| ENSG00000159403 | C1R       | 0.95   | 1.62   | 1.71 |
| ENSG00000160226 | C21orf2   | 2.88   | 5.16   | 1.79 |
| ENSG00000160298 | C21orf58  | 2.14   | 4.79   | 2.24 |
| ENSG00000172478 | C2orf54   | 0.12   | 1.10   | 9.48 |
| ENSG00000204128 | C2orf72   | 6.62   | 17.93  | 2.71 |
| ENSG00000042304 | C2orf83   | 0.48   | 1.13   | 2.35 |
| ENSG00000181744 | C3orf58   | 3.32   | 8.28   | 2.50 |

|                 |              |       |        |            |
|-----------------|--------------|-------|--------|------------|
| ENSG00000123843 | C4BPB        | 0.83  | 1.41   | 1.70       |
| ENSG00000164096 | C4orf3       | 74.40 | 218.75 | 2.94       |
| ENSG00000205208 | C4orf46      | 3.67  | 9.27   | 2.52       |
| ENSG00000205129 | C4orf47      | 0.63  | 2.75   | 4.38       |
| ENSG00000134830 | GPR77        | 0.75  | 1.16   | 1.55       |
| ENSG00000204420 | C6orf25      | 0.71  | 1.47   | 2.08       |
| ENSG00000248801 | RP11-664D7.4 | 1.46  | 3.16   | 2.16       |
| ENSG00000241852 | C8orf58      | 1.16  | 2.10   | 1.81       |
| ENSG00000230185 | C9orf147     | 0.44  | 1.02   | 2.30       |
| ENSG00000063180 | CA11         | 3.14  | 4.97   | 1.58       |
| ENSG00000074410 | CA12         | 4.32  | 9.43   | 2.18       |
| ENSG00000107159 | CA9          | 0.00  | 1.95   | 1952284.70 |
| ENSG00000167535 | CACNB3       | 3.48  | 7.06   | 2.03       |
| ENSG00000129007 | CALML4       | 4.93  | 8.21   | 1.67       |
| ENSG00000058404 | CAMK2B       | 1.94  | 4.19   | 2.16       |
| ENSG00000153048 | CARHSP1      | 8.92  | 15.95  | 1.79       |
| ENSG00000137812 | CASC5        | 1.45  | 5.58   | 3.86       |
| ENSG00000166762 | CATSPER2     | 1.65  | 2.52   | 1.53       |
| ENSG00000141668 | CBLN2        | 0.38  | 1.83   | 4.88       |
| ENSG00000108468 | CBX1         | 35.19 | 54.98  | 1.56       |
| ENSG00000173894 | CBX2         | 8.67  | 21.26  | 2.45       |
| ENSG00000094916 | CBX5         | 23.52 | 40.79  | 1.73       |
| ENSG00000135736 | CCDC102A     | 1.68  | 2.53   | 1.51       |
| ENSG00000175455 | CCDC14       | 4.40  | 7.63   | 1.74       |
| ENSG00000149548 | CCDC15       | 1.47  | 2.67   | 1.82       |
| ENSG00000198865 | CCDC152      | 16.90 | 28.28  | 1.67       |
| ENSG00000122483 | CCDC18       | 1.25  | 2.15   | 1.71       |
| ENSG00000213213 | KIAA1984     | 1.39  | 4.12   | 2.95       |
| ENSG00000163040 | CCDC74A      | 0.45  | 1.04   | 2.31       |
| ENSG00000120647 | CCDC77       | 3.46  | 5.61   | 1.62       |
| ENSG00000186166 | CCDC84       | 7.92  | 12.55  | 1.58       |
| ENSG00000015133 | CCDC88C      | 5.03  | 7.79   | 1.55       |
| ENSG00000151882 | CCL28        | 0.63  | 1.07   | 1.71       |
| ENSG00000175305 | CCNE2        | 0.52  | 1.59   | 3.07       |
| ENSG00000162063 | CCNF         | 4.23  | 7.40   | 1.75       |
| ENSG00000138764 | CCNG2        | 23.42 | 62.63  | 2.67       |
| ENSG00000163660 | CCNL1        | 7.40  | 11.96  | 1.62       |
| ENSG00000103540 | CCP110       | 3.46  | 9.35   | 2.70       |
| ENSG00000154429 | CCSAP        | 4.96  | 8.21   | 1.66       |

|                 |          |       |       |      |
|-----------------|----------|-------|-------|------|
| ENSG00000174950 | CD164L2  | 0.53  | 1.04  | 1.96 |
| ENSG00000120217 | CD274    | 1.07  | 1.96  | 1.84 |
| ENSG00000167775 | CD320    | 21.28 | 32.63 | 1.53 |
| ENSG00000104894 | CD37     | 1.81  | 5.43  | 3.00 |
| ENSG00000164045 | CDC25A   | 2.72  | 5.61  | 2.06 |
| ENSG00000093009 | CDC45    | 6.85  | 13.72 | 2.00 |
| ENSG00000094804 | CDC6     | 13.43 | 20.95 | 1.56 |
| ENSG00000097046 | CDC7     | 5.58  | 10.79 | 1.93 |
| ENSG00000184661 | CDCA2    | 3.66  | 7.61  | 2.08 |
| ENSG00000111665 | CDCA3    | 3.24  | 6.28  | 1.93 |
| ENSG00000170779 | CDCA4    | 8.28  | 17.45 | 2.11 |
| ENSG00000146670 | CDCA5    | 7.50  | 16.10 | 2.15 |
| ENSG00000144354 | CDCA7    | 4.10  | 8.84  | 2.15 |
| ENSG00000134690 | CDCA8    | 12.93 | 20.57 | 1.59 |
| ENSG00000139880 | CDH24    | 1.08  | 2.46  | 2.27 |
| ENSG00000170312 | CDK1     | 20.16 | 57.29 | 2.84 |
| ENSG00000058091 | CDK14    | 6.89  | 11.49 | 1.67 |
| ENSG00000117266 | CDK18    | 0.41  | 1.13  | 2.74 |
| ENSG00000123374 | CDK2     | 10.92 | 27.76 | 2.54 |
| ENSG00000176749 | CDK5R1   | 4.33  | 11.97 | 2.77 |
| ENSG00000136861 | CDK5RAP2 | 2.93  | 4.48  | 1.53 |
| ENSG00000129757 | CDKN1C   | 1.08  | 4.78  | 4.44 |
| ENSG00000123080 | CDKN2C   | 5.25  | 11.13 | 2.12 |
| ENSG00000129355 | CDKN2D   | 8.00  | 12.89 | 1.61 |
| ENSG00000167513 | CDT1     | 9.41  | 17.90 | 1.90 |
| ENSG00000186567 | CEACAM19 | 0.90  | 1.38  | 1.53 |
| ENSG00000099954 | CECR2    | 0.72  | 1.24  | 1.73 |
| ENSG00000143126 | CELSR2   | 8.07  | 12.73 | 1.58 |
| ENSG00000145241 | CENPC1   | 0.84  | 1.48  | 1.77 |
| ENSG00000138778 | CENPE    | 0.38  | 1.08  | 2.84 |
| ENSG00000117724 | CENPF    | 2.94  | 10.60 | 3.61 |
| ENSG00000153044 | CENPH    | 15.03 | 26.26 | 1.75 |
| ENSG00000102384 | CENPI    | 1.52  | 4.37  | 2.88 |
| ENSG00000151849 | CENPJ    | 0.75  | 1.44  | 1.93 |
| ENSG00000123219 | CENPK    | 1.18  | 3.21  | 2.71 |
| ENSG00000138092 | CENPO    | 5.20  | 8.63  | 1.66 |
| ENSG00000188312 | CENPP    | 2.23  | 3.47  | 1.55 |
| ENSG00000151725 | MLF1IP   | 4.92  | 9.94  | 2.02 |
| ENSG00000166582 | CENPV    | 4.37  | 6.87  | 1.57 |

|                 |            |        |        |      |
|-----------------|------------|--------|--------|------|
| ENSG00000174799 | CEP135     | 1.13   | 1.77   | 1.56 |
| ENSG00000103995 | CEP152     | 0.86   | 1.50   | 1.75 |
| ENSG00000126001 | CEP250     | 9.30   | 15.31  | 1.65 |
| ENSG00000166004 | KIAA1731   | 2.92   | 5.21   | 1.78 |
| ENSG00000138180 | CEP55      | 8.05   | 12.12  | 1.51 |
| ENSG00000114107 | CEP70      | 2.26   | 3.47   | 1.53 |
| ENSG00000112877 | CEP72      | 1.97   | 3.76   | 1.91 |
| ENSG00000148019 | CEP78      | 2.38   | 4.01   | 1.68 |
| ENSG00000172824 | CES4A      | 0.76   | 1.24   | 1.63 |
| ENSG00000206530 | WDR52      | 0.47   | 1.03   | 2.21 |
| ENSG00000105792 | C7orf63    | 3.82   | 9.87   | 2.58 |
| ENSG00000167670 | CHAF1A     | 12.94  | 20.19  | 1.56 |
| ENSG00000159259 | CHAF1B     | 5.25   | 8.20   | 1.56 |
| ENSG00000171316 | CHD7       | 2.26   | 3.43   | 1.52 |
| ENSG00000149554 | CHEK1      | 5.56   | 9.24   | 1.66 |
| ENSG00000183765 | CHEK2      | 1.90   | 3.07   | 1.62 |
| ENSG00000159208 | C1orf51    | 3.26   | 10.75  | 3.30 |
| ENSG00000114737 | CISH       | 0.63   | 1.16   | 1.83 |
| ENSG00000122966 | CIT        | 0.85   | 2.21   | 2.59 |
| ENSG00000164442 | CITED2     | 27.57  | 45.68  | 1.66 |
| ENSG00000169607 | CKAP2L     | 1.95   | 3.87   | 1.98 |
| ENSG00000166165 | CKB        | 120.14 | 268.04 | 2.23 |
| ENSG00000254788 | CKLF-CMTM1 | 0.44   | 1.32   | 2.99 |
| ENSG00000157224 | CLDN12     | 33.02  | 58.36  | 1.77 |
| ENSG00000069493 | CLEC2D     | 0.99   | 1.83   | 1.85 |
| ENSG00000163815 | CLEC3B     | 0.24   | 1.32   | 5.57 |
| ENSG00000172243 | CLEC7A     | 1.12   | 1.73   | 1.55 |
| ENSG00000106665 | CLIP2      | 0.54   | 1.18   | 2.16 |
| ENSG00000105270 | CLIP3      | 0.64   | 1.02   | 1.59 |
| ENSG00000113240 | CLK4       | 2.05   | 3.13   | 1.52 |
| ENSG00000092853 | CLSPN      | 0.76   | 2.29   | 3.02 |
| ENSG00000120885 | CLU        | 2.13   | 4.73   | 2.22 |
| ENSG00000089505 | CMTM1      | 0.49   | 1.13   | 2.32 |
| ENSG00000174871 | CNIH2      | 0.45   | 2.36   | 5.21 |
| ENSG00000149970 | CNKSR2     | 0.95   | 3.00   | 3.16 |
| ENSG00000153721 | CNKSR3     | 1.35   | 2.35   | 1.74 |
| ENSG00000119946 | CNNM1      | 1.96   | 3.70   | 1.89 |
| ENSG00000119397 | CNTRL      | 0.49   | 1.29   | 2.63 |
| ENSG00000144810 | COL8A1     | 0.73   | 1.21   | 1.66 |



|                 |          |       |       |       |
|-----------------|----------|-------|-------|-------|
| ENSG00000196167 | C11orf92 | 22.80 | 79.47 | 3.49  |
| ENSG00000158270 | COLEC12  | 6.54  | 14.99 | 2.29  |
| ENSG00000135469 | COQ10A   | 4.71  | 8.05  | 1.71  |
| ENSG00000140848 | CPNE2    | 2.52  | 4.15  | 1.65  |
| ENSG00000178773 | CPNE7    | 11.01 | 19.50 | 1.77  |
| ENSG00000080819 | CPOX     | 6.20  | 14.24 | 2.30  |
| ENSG00000182809 | CRIP2    | 3.73  | 9.38  | 2.51  |
| ENSG00000072832 | CRMP1    | 2.08  | 3.22  | 1.55  |
| ENSG00000109846 | CRYAB    | 1.13  | 11.37 | 10.05 |
| ENSG00000114646 | CSPG5    | 2.93  | 6.13  | 2.09  |
| ENSG00000119326 | CTNNAL1  | 3.90  | 6.57  | 1.68  |
| ENSG00000162438 | CTRC     | 0.75  | 1.47  | 1.97  |
| ENSG00000143387 | CTSK     | 1.51  | 3.14  | 2.08  |
| ENSG00000107562 | CXCL12   | 0.05  | 1.19  | 25.13 |
| ENSG00000121966 | CXCR4    | 0.07  | 5.12  | 72.11 |
| ENSG00000166394 | CYB5R2   | 0.57  | 1.53  | 2.69  |
| ENSG00000108242 | CYP2C18  | 1.14  | 1.94  | 1.71  |
| ENSG00000138109 | CYP2C9   | 4.31  | 6.50  | 1.51  |
| ENSG00000073067 | CYP2W1   | 0.66  | 1.07  | 1.61  |
| ENSG00000036530 | CYP46A1  | 0.64  | 1.01  | 1.58  |
| ENSG00000142871 | CYR61    | 3.62  | 13.59 | 3.75  |
| ENSG00000035664 | DAPK2    | 0.83  | 1.51  | 1.82  |
| ENSG00000115866 | DARS     | 13.26 | 21.77 | 1.64  |
| ENSG00000006634 | DBF4     | 4.18  | 6.93  | 1.66  |
| ENSG00000156136 | DCK      | 15.27 | 26.04 | 1.71  |
| ENSG00000118655 | DCLRE1B  | 3.82  | 6.52  | 1.71  |
| ENSG00000134574 | DDB2     | 21.20 | 31.89 | 1.50  |
| ENSG00000085788 | DDHD2    | 6.02  | 9.72  | 1.61  |
| ENSG00000165490 | C11orf82 | 1.82  | 3.35  | 1.84  |
| ENSG00000145358 | DDIT4L   | 0.59  | 1.73  | 2.92  |
| ENSG00000013573 | DDX11    | 5.47  | 10.53 | 1.93  |
| ENSG00000067048 | DDX3Y    | 15.33 | 35.33 | 2.30  |
| ENSG00000024526 | DEPDC1   | 1.81  | 4.14  | 2.28  |
| ENSG00000035499 | DEPDC1B  | 2.51  | 5.19  | 2.07  |
| ENSG00000099958 | DERL3    | 0.93  | 4.16  | 4.47  |
| ENSG00000204311 | DFNB59   | 0.52  | 1.17  | 2.24  |
| ENSG00000128191 | DGCR8    | 10.22 | 15.59 | 1.53  |
| ENSG00000065357 | DGKA     | 0.59  | 1.01  | 1.72  |
| ENSG00000104808 | DHDH     | 1.53  | 2.75  | 1.80  |

|                 |          |       |        |       |
|-----------------|----------|-------|--------|-------|
| ENSG00000162496 | DHRS3    | 9.25  | 14.07  | 1.52  |
| ENSG00000139734 | DIAPH3   | 1.21  | 1.85   | 1.53  |
| ENSG00000211452 | DIO1     | 2.52  | 6.68   | 2.65  |
| ENSG00000197406 | DIO3     | 3.19  | 37.72  | 11.82 |
| ENSG00000176490 | DIRAS1   | 6.12  | 10.09  | 1.65  |
| ENSG00000126787 | DLGAP5   | 2.15  | 5.27   | 2.46  |
| ENSG00000144355 | DLX1     | 1.13  | 2.15   | 1.91  |
| ENSG00000197587 | DMBX1    | 0.88  | 1.60   | 1.82  |
| ENSG00000138346 | DNA2     | 0.94  | 2.75   | 2.94  |
| ENSG00000039139 | DNAH5    | 0.86  | 1.35   | 1.56  |
| ENSG00000137094 | DNAJB5   | 2.17  | 4.23   | 1.95  |
| ENSG00000178401 | DNAJC22  | 5.25  | 8.61   | 1.64  |
| ENSG00000213918 | DNASE1   | 7.47  | 11.87  | 1.59  |
| ENSG00000167968 | DNASE1L2 | 1.28  | 1.98   | 1.54  |
| ENSG00000106976 | DNM1     | 0.71  | 1.33   | 1.87  |
| ENSG00000115325 | DOK1     | 1.31  | 2.24   | 1.71  |
| ENSG00000146094 | DOK3     | 0.87  | 1.71   | 1.98  |
| ENSG00000159147 | DONSON   | 1.62  | 2.76   | 1.70  |
| ENSG00000092964 | DPYSL2   | 2.17  | 6.48   | 2.98  |
| ENSG00000113657 | DPYSL3   | 0.76  | 1.73   | 2.29  |
| ENSG00000151640 | DPYSL4   | 3.87  | 24.56  | 6.35  |
| ENSG00000134755 | DSC2     | 21.49 | 42.87  | 1.99  |
| ENSG00000136982 | DSCC1    | 3.75  | 6.99   | 1.87  |
| ENSG00000149636 | DSN1     | 3.97  | 6.98   | 1.76  |
| ENSG00000096696 | DSP      | 32.91 | 111.15 | 3.38  |
| ENSG00000143476 | DTL      | 3.83  | 8.51   | 2.22  |
| ENSG00000134769 | DTNA     | 0.31  | 1.51   | 4.81  |
| ENSG00000178498 | DTX3     | 0.71  | 1.70   | 2.40  |
| ENSG00000120875 | DUSP4    | 21.71 | 40.40  | 1.86  |
| ENSG00000138166 | DUSP5    | 2.43  | 3.93   | 1.62  |
| ENSG00000130829 | DUSP9    | 3.62  | 7.81   | 2.16  |
| ENSG00000007968 | E2F2     | 1.19  | 2.66   | 2.24  |
| ENSG00000165891 | E2F7     | 1.52  | 4.87   | 3.21  |
| ENSG00000129173 | E2F8     | 0.71  | 3.17   | 4.43  |
| ENSG00000088881 | EBF4     | 0.65  | 1.66   | 2.57  |
| ENSG00000114346 | ECT2     | 7.17  | 17.98  | 2.51  |
| ENSG00000127129 | EDN2     | 0.95  | 2.37   | 2.49  |
| ENSG00000102189 | EEA1     | 2.31  | 3.76   | 1.63  |
| ENSG00000172421 | EFCAB3   | 0.93  | 3.20   | 3.43  |

|                 |          |        |        |       |
|-----------------|----------|--------|--------|-------|
| ENSG00000143590 | EFNA3    | 22.65  | 48.09  | 2.12  |
| ENSG00000184349 | EFNA5    | 31.65  | 57.88  | 1.83  |
| ENSG00000146648 | EGFR     | 10.96  | 47.58  | 4.34  |
| ENSG00000135766 | EGLN1    | 12.93  | 25.33  | 1.96  |
| ENSG00000129521 | EGLN3    | 1.18   | 14.04  | 11.93 |
| ENSG00000161960 | EIF4A1   | 1.44   | 2.27   | 1.58  |
| ENSG00000156976 | EIF4A2   | 76.17  | 119.79 | 1.57  |
| ENSG00000102034 | ELF4     | 1.39   | 2.15   | 1.54  |
| ENSG00000166897 | ELFN2    | 0.83   | 1.28   | 1.54  |
| ENSG00000154920 | EME1     | 2.78   | 5.34   | 1.92  |
| ENSG00000213853 | EMP2     | 8.32   | 13.73  | 1.65  |
| ENSG00000074800 | ENO1     | 122.04 | 343.37 | 2.81  |
| ENSG00000111674 | ENO2     | 5.52   | 65.10  | 11.79 |
| ENSG00000120658 | ENOX1    | 1.45   | 2.93   | 2.02  |
| ENSG00000154269 | ENPP3    | 0.50   | 1.30   | 2.62  |
| ENSG00000054179 | ENTPD2   | 2.49   | 6.19   | 2.48  |
| ENSG00000079819 | EPB41L2  | 0.70   | 1.42   | 2.04  |
| ENSG00000196411 | EPHB4    | 6.28   | 11.17  | 1.78  |
| ENSG00000186871 | ERCC6L   | 1.36   | 4.93   | 3.63  |
| ENSG00000197930 | ERO1L    | 5.25   | 23.39  | 4.46  |
| ENSG00000171320 | ESCO2    | 2.69   | 5.43   | 2.02  |
| ENSG00000135476 | ESPL1    | 1.91   | 5.61   | 2.94  |
| ENSG00000187017 | ESPN     | 0.59   | 1.48   | 2.52  |
| ENSG00000158220 | ESYT3    | 1.59   | 2.57   | 1.62  |
| ENSG00000157557 | ETS2     | 2.21   | 4.19   | 1.90  |
| ENSG00000166979 | EVA1C    | 0.71   | 1.52   | 2.16  |
| ENSG00000072840 | EVC      | 7.40   | 11.66  | 1.58  |
| ENSG00000196405 | EVL      | 6.77   | 12.41  | 1.83  |
| ENSG00000174371 | EXO1     | 2.05   | 4.38   | 2.13  |
| ENSG00000181104 | F2R      | 7.24   | 13.93  | 1.92  |
| ENSG00000170231 | FABP6    | 1.86   | 2.92   | 1.57  |
| ENSG00000134824 | FADS2    | 57.78  | 118.24 | 2.05  |
| ENSG00000144199 | FAHD2B   | 1.16   | 2.24   | 1.93  |
| ENSG00000189057 | FAM111B  | 3.56   | 13.48  | 3.79  |
| ENSG00000185519 | FAM131C  | 0.49   | 1.04   | 2.14  |
| ENSG00000138640 | FAM13A   | 6.00   | 12.51  | 2.08  |
| ENSG00000114023 | FAM162A  | 57.17  | 149.73 | 2.62  |
| ENSG00000161682 | FAM171A2 | 0.55   | 1.80   | 3.25  |
| ENSG00000197520 | FAM177B  | 0.44   | 3.61   | 8.16  |

|                 |         |       |       |       |
|-----------------|---------|-------|-------|-------|
| ENSG00000189350 | FAM179A | 0.72  | 1.21  | 1.68  |
| ENSG00000186973 | FAM183A | 1.23  | 1.86  | 1.51  |
| ENSG00000122378 | FAM213A | 6.41  | 9.81  | 1.53  |
| ENSG00000188732 | FAM221A | 3.53  | 5.67  | 1.61  |
| ENSG00000184949 | FAM227A | 1.69  | 3.05  | 1.81  |
| ENSG00000167695 | FAM57A  | 18.50 | 34.06 | 1.84  |
| ENSG00000129195 | FAM64A  | 6.67  | 16.90 | 2.54  |
| ENSG00000188610 | FAM72B  | 5.78  | 8.73  | 1.51  |
| ENSG00000176973 | FAM89B  | 30.30 | 46.29 | 1.53  |
| ENSG00000188343 | FAM92A1 | 0.61  | 1.85  | 3.04  |
| ENSG00000158169 | FANCC   | 2.01  | 3.80  | 1.89  |
| ENSG00000144554 | FANCD2  | 5.11  | 10.80 | 2.11  |
| ENSG00000140525 | FANCI   | 6.95  | 19.55 | 2.81  |
| ENSG00000187790 | FANCM   | 0.95  | 1.83  | 1.92  |
| ENSG00000152767 | FARP1   | 1.33  | 2.05  | 1.55  |
| ENSG00000141665 | FBXO15  | 0.87  | 1.38  | 1.58  |
| ENSG00000214050 | FBXO16  | 2.55  | 4.64  | 1.82  |
| ENSG00000112029 | FBXO5   | 2.95  | 5.90  | 2.00  |
| ENSG00000168496 | FEN1    | 21.52 | 45.89 | 2.13  |
| ENSG00000163497 | FEV     | 1.55  | 2.70  | 1.75  |
| ENSG00000126262 | FFAR2   | 0.75  | 1.97  | 2.63  |
| ENSG00000129682 | FGF13   | 2.68  | 4.40  | 1.64  |
| ENSG00000077782 | FGFR1   | 0.67  | 1.44  | 2.14  |
| ENSG00000132436 | FIGNL1  | 5.83  | 11.71 | 2.01  |
| ENSG00000079150 | FKBP7   | 1.11  | 2.40  | 2.16  |
| ENSG00000115414 | FN1     | 3.85  | 12.90 | 3.35  |
| ENSG00000141560 | FN3KRP  | 12.86 | 19.81 | 1.54  |
| ENSG00000137942 | FNBP1L  | 20.84 | 32.12 | 1.54  |
| ENSG00000170345 | FOS     | 0.64  | 7.09  | 11.09 |
| ENSG00000075426 | FOSL2   | 6.91  | 12.37 | 1.79  |
| ENSG00000111206 | FOXM1   | 13.90 | 24.66 | 1.78  |
| ENSG00000073910 | FRY     | 2.00  | 3.15  | 1.57  |
| ENSG00000075539 | FRYL    | 1.19  | 2.43  | 2.03  |
| ENSG00000075618 | FSCN1   | 3.01  | 18.17 | 6.04  |
| ENSG00000196968 | FUT11   | 5.30  | 28.48 | 5.38  |
| ENSG00000104290 | FZD3    | 3.19  | 5.49  | 1.72  |
| ENSG00000092140 | G2E3    | 5.00  | 7.69  | 1.54  |
| ENSG00000109458 | GAB1    | 1.32  | 2.03  | 1.54  |
| ENSG00000204681 | GABBR1  | 1.55  | 2.33  | 1.51  |

|                 |               |        |         |      |
|-----------------|---------------|--------|---------|------|
| ENSG00000099860 | GADD45B       | 2.64   | 17.73   | 6.73 |
| ENSG00000130222 | GADD45G       | 16.52  | 25.19   | 1.52 |
| ENSG00000108479 | GALK1         | 4.66   | 8.01    | 1.72 |
| ENSG00000111640 | GAPDH         | 727.54 | 1606.61 | 2.21 |
| ENSG00000136895 | GARNL3        | 1.33   | 2.82    | 2.12 |
| ENSG00000139354 | GAS2L3        | 1.27   | 2.77    | 2.18 |
| ENSG00000114480 | GBE1          | 7.96   | 13.27   | 1.67 |
| ENSG00000137880 | GCHFR         | 25.69  | 39.03   | 1.52 |
| ENSG00000001084 | GCLC          | 1.96   | 2.98    | 1.52 |
| ENSG00000187210 | GCNT1         | 10.63  | 24.44   | 2.30 |
| ENSG00000135414 | GDF11         | 7.09   | 12.66   | 1.79 |
| ENSG00000130513 | GDF15         | 727.99 | 1434.35 | 1.97 |
| ENSG00000178295 | GEN1          | 2.04   | 3.71    | 1.81 |
| ENSG00000137563 | GGH           | 2.99   | 4.66    | 1.56 |
| ENSG00000101003 | GIN51         | 8.36   | 21.66   | 2.59 |
| ENSG00000131153 | GIN52         | 3.10   | 5.50    | 1.77 |
| ENSG00000147536 | GIN54         | 3.90   | 7.23    | 1.85 |
| ENSG00000182963 | GJC1          | 1.08   | 2.19    | 2.02 |
| ENSG00000102393 | GLA           | 3.76   | 7.06    | 1.88 |
| ENSG00000149328 | GLB1L2        | 6.98   | 11.74   | 1.68 |
| ENSG00000156689 | GLYATL2       | 2.56   | 4.39    | 1.71 |
| ENSG00000185838 | GNB1L         | 0.88   | 1.38    | 1.58 |
| ENSG00000168243 | GNG4          | 1.20   | 2.82    | 2.35 |
| ENSG00000184206 | RP11-671M22.1 | 0.87   | 1.30    | 1.50 |
| ENSG00000175265 | GOLGA8A       | 7.67   | 25.83   | 3.37 |
| ENSG00000215252 | GOLGA8B       | 5.05   | 8.49    | 1.68 |
| ENSG00000063660 | GPC1          | 4.14   | 6.28    | 1.52 |
| ENSG00000213420 | GPC2          | 1.27   | 3.47    | 2.74 |
| ENSG00000147257 | GPC3          | 2.23   | 4.72    | 2.12 |
| ENSG00000164850 | GPER          | 3.53   | 12.41   | 3.52 |
| ENSG00000105220 | GPI           | 102.92 | 381.99  | 3.71 |
| ENSG00000136235 | GPNMB         | 5.11   | 7.88    | 1.54 |
| ENSG00000077585 | GPR137B       | 8.99   | 14.59   | 1.62 |
| ENSG00000164849 | GPR146        | 0.69   | 3.17    | 4.59 |
| ENSG00000163328 | GPR155        | 1.56   | 2.56    | 1.63 |
| ENSG00000171657 | GPR82         | 0.65   | 1.06    | 1.65 |
| ENSG00000204175 | GPRIN2        | 14.25  | 22.50   | 1.58 |
| ENSG00000160360 | GPSM1         | 11.32  | 18.87   | 1.67 |
| ENSG00000167701 | GPT           | 1.29   | 2.41    | 1.87 |

|                 |          |       |        |       |
|-----------------|----------|-------|--------|-------|
| ENSG00000176884 | GRIN1    | 2.47  | 4.32   | 1.75  |
| ENSG00000198785 | GRIN3A   | 0.39  | 2.18   | 5.54  |
| ENSG00000148180 | GSN      | 1.76  | 2.91   | 1.66  |
| ENSG00000134202 | GSTM3    | 6.98  | 11.09  | 1.59  |
| ENSG00000099984 | GSTT2    | 2.08  | 5.26   | 2.53  |
| ENSG00000133433 | GSTT2B   | 1.44  | 3.75   | 2.61  |
| ENSG00000145736 | GTF2H2   | 6.88  | 10.95  | 1.59  |
| ENSG00000213780 | GTF2H4   | 0.26  | 3.00   | 11.32 |
| ENSG00000075218 | GTSE1    | 5.48  | 13.16  | 2.40  |
| ENSG00000188486 | H2AFX    | 86.91 | 144.85 | 1.67  |
| ENSG00000138796 | HADH     | 35.53 | 61.73  | 1.74  |
| ENSG00000214367 | HAUS3    | 3.09  | 5.31   | 1.72  |
| ENSG00000147874 | HAUS6    | 4.32  | 7.53   | 1.74  |
| ENSG00000119969 | HELLS    | 1.52  | 4.01   | 2.63  |
| ENSG00000069812 | HES2     | 1.46  | 2.85   | 1.96  |
| ENSG00000144485 | HES6     | 55.19 | 98.59  | 1.79  |
| ENSG00000179111 | HES7     | 0.28  | 1.14   | 4.13  |
| ENSG00000135245 | HILPDA   | 13.83 | 35.34  | 2.55  |
| ENSG00000123485 | HJURP    | 3.62  | 9.26   | 2.56  |
| ENSG00000159399 | HK2      | 16.29 | 74.27  | 4.56  |
| ENSG00000206503 | HLA-A    | 40.33 | 62.10  | 1.54  |
| ENSG00000204632 | HLA-G    | 0.65  | 1.55   | 2.38  |
| ENSG00000071794 | HLTF     | 16.54 | 28.65  | 1.73  |
| ENSG00000164104 | HMGB2    | 26.82 | 56.95  | 2.12  |
| ENSG00000029993 | HMGB3    | 12.72 | 22.99  | 1.81  |
| ENSG00000072571 | HMMR     | 11.67 | 21.39  | 1.83  |
| ENSG00000100292 | HMOX1    | 22.56 | 35.53  | 1.57  |
| ENSG00000138668 | HNRNPD   | 14.93 | 25.19  | 1.69  |
| ENSG00000152795 | HNRPDL   | 15.26 | 28.51  | 1.87  |
| ENSG00000051128 | HOMER3   | 2.56  | 4.17   | 1.63  |
| ENSG00000106004 | HOXA5    | 1.98  | 3.01   | 1.52  |
| ENSG00000106006 | HOXA6    | 1.05  | 1.92   | 1.82  |
| ENSG00000115756 | HPCAL1   | 6.52  | 11.94  | 1.83  |
| ENSG00000164120 | HPGD     | 0.93  | 1.70   | 1.82  |
| ENSG00000165704 | HPRT1    | 30.54 | 57.82  | 1.89  |
| ENSG00000176387 | HSD11B2  | 20.31 | 45.46  | 2.24  |
| ENSG00000087076 | HSD17B14 | 0.48  | 1.60   | 3.30  |
| ENSG00000025423 | HSD17B6  | 0.74  | 1.32   | 1.79  |
| ENSG00000102878 | HSF4     | 3.23  | 5.26   | 1.63  |

|                 |            |        |        |       |
|-----------------|------------|--------|--------|-------|
| ENSG00000080824 | HSP90AA1   | 137.24 | 224.15 | 1.63  |
| ENSG00000204388 | HSPA1B     | 60.12  | 103.19 | 1.72  |
| ENSG00000204389 | HSPA1A     | 47.19  | 82.03  | 1.74  |
| ENSG00000106211 | HSPB1      | 269.43 | 458.14 | 1.70  |
| ENSG00000081870 | HSPB11     | 4.50   | 7.38   | 1.64  |
| ENSG00000152137 | HSPB8      | 1.73   | 2.91   | 1.68  |
| ENSG00000120694 | HSPH1      | 12.74  | 21.69  | 1.70  |
| ENSG00000157219 | HTR5A      | 0.03   | 2.42   | 73.90 |
| ENSG00000220575 | AC093726.4 | 0.29   | 3.27   | 11.34 |
| ENSG00000125968 | ID1        | 3.07   | 10.18  | 3.32  |
| ENSG00000117318 | ID3        | 5.06   | 9.83   | 1.94  |
| ENSG00000182054 | IDH2       | 26.13  | 39.49  | 1.51  |
| ENSG00000140443 | IGF1R      | 7.38   | 11.98  | 1.62  |
| ENSG00000126246 | IGFLR1     | 1.60   | 2.96   | 1.85  |
| ENSG00000085552 | IGSF9      | 2.16   | 4.74   | 2.20  |
| ENSG00000080854 | IGSF9B     | 0.68   | 1.20   | 1.76  |
| ENSG00000166130 | IKBIP      | 1.04   | 2.17   | 2.09  |
| ENSG00000124391 | IL17C      | 0.34   | 1.30   | 3.81  |
| ENSG00000056736 | IL17RB     | 4.78   | 8.09   | 1.69  |
| ENSG00000136689 | IL1RN      | 2.12   | 4.64   | 2.19  |
| ENSG00000008517 | IL32       | 1.08   | 4.04   | 3.74  |
| ENSG00000136695 | IL36RN     | 1.30   | 2.27   | 1.75  |
| ENSG00000149503 | INCENP     | 8.65   | 17.25  | 1.99  |
| ENSG00000125629 | INSIG2     | 7.71   | 22.54  | 2.92  |
| ENSG00000198700 | IPO9       | 13.00  | 20.01  | 1.54  |
| ENSG00000160051 | IQCC       | 3.70   | 5.90   | 1.59  |
| ENSG00000169047 | IRS1       | 2.66   | 4.17   | 1.57  |
| ENSG00000105655 | ISYNA1     | 2.71   | 5.24   | 1.93  |
| ENSG00000096433 | ITPR3      | 7.42   | 14.49  | 1.95  |
| ENSG00000116679 | IVNS1ABP   | 3.14   | 9.02   | 2.87  |
| ENSG00000099840 | IZUMO4     | 0.75   | 1.84   | 2.45  |
| ENSG00000171988 | JMJD1C     | 5.64   | 9.11   | 1.61  |
| ENSG00000197256 | KANK2      | 5.70   | 9.42   | 1.65  |
| ENSG00000144445 | KANSL1L    | 1.83   | 3.21   | 1.75  |
| ENSG00000131398 | KCNC3      | 1.32   | 3.63   | 2.76  |
| ENSG00000184408 | KCND2      | 0.33   | 1.81   | 5.39  |
| ENSG00000171385 | KCND3      | 2.24   | 4.33   | 1.93  |
| ENSG00000055118 | KCNH2      | 0.63   | 1.49   | 2.37  |
| ENSG00000183960 | KCNH8      | 0.52   | 1.19   | 2.29  |

|                 |           |        |         |       |
|-----------------|-----------|--------|---------|-------|
| ENSG00000053918 | KCNQ1     | 2.61   | 5.15    | 1.97  |
| ENSG00000089094 | KDM2B     | 2.55   | 3.84    | 1.51  |
| ENSG00000115548 | KDM3A     | 3.43   | 14.20   | 4.14  |
| ENSG00000127663 | KDM4B     | 14.15  | 31.24   | 2.21  |
| ENSG00000166803 | KIAA0101  | 4.46   | 11.66   | 2.61  |
| ENSG00000196123 | KIAA0895L | 8.32   | 15.91   | 1.91  |
| ENSG00000109265 | KIAA1211  | 1.52   | 2.94    | 1.93  |
| ENSG00000163507 | KIAA1524  | 0.86   | 1.53    | 1.76  |
| ENSG00000122778 | KIAA1549  | 3.11   | 4.79    | 1.54  |
| ENSG00000174718 | KIAA1551  | 2.64   | 5.42    | 2.05  |
| ENSG00000130518 | KIAA1683  | 0.84   | 1.67    | 1.98  |
| ENSG00000144320 | KIAA1715  | 3.68   | 8.30    | 2.26  |
| ENSG00000165185 | KIAA1958  | 2.41   | 4.08    | 1.69  |
| ENSG00000116685 | KIAA2013  | 43.85  | 82.48   | 1.88  |
| ENSG00000163808 | KIF15     | 1.06   | 4.89    | 4.63  |
| ENSG00000186185 | KIF18B    | 2.32   | 6.71    | 2.89  |
| ENSG00000112984 | KIF20A    | 7.50   | 19.14   | 2.55  |
| ENSG00000138182 | KIF20B    | 1.40   | 3.13    | 2.23  |
| ENSG00000137807 | KIF23     | 3.16   | 6.59    | 2.08  |
| ENSG00000186638 | KIF24     | 1.45   | 3.10    | 2.14  |
| ENSG00000142945 | KIF2C     | 9.98   | 16.37   | 1.64  |
| ENSG00000084731 | KIF3C     | 1.09   | 1.98    | 1.81  |
| ENSG00000090889 | KIF4A     | 5.95   | 11.90   | 2.00  |
| ENSG00000168280 | KIF5C     | 5.41   | 8.17    | 1.51  |
| ENSG00000166813 | KIF7      | 0.68   | 1.09    | 1.61  |
| ENSG00000116014 | KISS1R    | 0.21   | 11.89   | 57.12 |
| ENSG00000049130 | KITLG     | 0.22   | 1.08    | 4.81  |
| ENSG00000136826 | KLF4      | 6.11   | 11.98   | 1.96  |
| ENSG00000114796 | KLHL24    | 7.49   | 12.35   | 1.65  |
| ENSG00000183655 | KLHL25    | 3.86   | 6.00    | 1.55  |
| ENSG00000174562 | KLK15     | 1.60   | 3.53    | 2.21  |
| ENSG00000167751 | KLK2      | 22.23  | 134.93  | 6.07  |
| ENSG00000142515 | KLK3      | 747.53 | 1313.96 | 1.76  |
| ENSG00000167749 | KLK4      | 83.39  | 134.62  | 1.61  |
| ENSG00000184445 | KNTC1     | 2.56   | 7.53    | 2.94  |
| ENSG00000182481 | KPNA2     | 38.28  | 64.41   | 1.68  |
| ENSG00000171345 | KRT19     | 1.67   | 5.23    | 3.13  |
| ENSG00000167767 | KRT80     | 2.09   | 4.89    | 2.35  |
| ENSG00000126777 | KTN1      | 9.14   | 13.74   | 1.50  |



|                 |               |       |        |       |
|-----------------|---------------|-------|--------|-------|
| ENSG00000213626 | LBH           | 0.12  | 1.01   | 8.34  |
| ENSG00000184925 | LCN12         | 0.31  | 1.08   | 3.50  |
| ENSG00000188501 | LCTL          | 0.71  | 1.09   | 1.53  |
| ENSG00000134333 | LDHA          | 89.28 | 476.41 | 5.34  |
| ENSG00000164406 | LEAP2         | 1.25  | 2.83   | 2.27  |
| ENSG00000106003 | LFNG          | 0.86  | 5.39   | 6.31  |
| ENSG00000100097 | LGALS1        | 0.28  | 1.83   | 6.46  |
| ENSG00000128342 | LIF           | 3.50  | 6.92   | 1.98  |
| ENSG00000105486 | LIG1          | 0.45  | 1.20   | 2.63  |
| ENSG00000111052 | LIN7A         | 1.55  | 3.13   | 2.02  |
| ENSG00000082929 | C4orf6        | 0.06  | 1.12   | 18.51 |
| ENSG00000220008 | LINGO3        | 0.36  | 1.07   | 2.98  |
| ENSG00000113368 | LMNB1         | 28.16 | 66.05  | 2.35  |
| ENSG00000228804 | RP11-211G3.3  | 1.36  | 2.08   | 1.53  |
| ENSG00000257545 | RP11-144F15.1 | 0.80  | 1.86   | 2.32  |
| ENSG00000179240 | RP11-111M22.2 | 0.77  | 1.44   | 1.87  |
| ENSG00000005189 | AC004381.6    | 4.13  | 6.88   | 1.66  |
| ENSG00000175556 | LONRF3        | 2.00  | 3.28   | 1.64  |
| ENSG00000113083 | LOX           | 2.93  | 15.87  | 5.41  |
| ENSG00000176454 | LPCAT4        | 1.78  | 3.13   | 1.76  |
| ENSG00000132793 | LPIN3         | 5.45  | 10.49  | 1.92  |
| ENSG00000139263 | LRIG3         | 1.93  | 3.33   | 1.73  |
| ENSG00000123384 | LRP1          | 1.96  | 3.99   | 2.04  |
| ENSG00000109771 | LRP2BP        | 0.70  | 1.50   | 2.13  |
| ENSG00000100068 | LRP5L         | 2.33  | 3.62   | 1.55  |
| ENSG00000157193 | LRP8          | 2.66  | 4.54   | 1.70  |
| ENSG00000169683 | LRRC45        | 4.10  | 7.89   | 1.93  |
| ENSG00000133739 | LRRCC1        | 2.04  | 3.36   | 1.65  |
| ENSG00000007392 | LUC7L         | 3.70  | 6.95   | 1.88  |
| ENSG00000108848 | LUC7L3        | 19.88 | 30.36  | 1.53  |
| ENSG00000187398 | LUZP2         | 5.55  | 8.62   | 1.55  |
| ENSG00000183833 | MAATS1        | 0.35  | 1.13   | 3.21  |
| ENSG00000133315 | MACROD1       | 3.55  | 6.20   | 1.75  |
| ENSG00000164109 | MAD2L1        | 4.03  | 10.49  | 2.60  |
| ENSG00000185022 | MAFF          | 1.18  | 5.06   | 4.28  |
| ENSG00000154545 | MAGED4        | 0.93  | 1.49   | 1.60  |
| ENSG00000172175 | MALT1         | 9.34  | 37.82  | 4.05  |
| ENSG00000117643 | MAN1C1        | 0.77  | 1.28   | 1.66  |
| ENSG00000172469 | MANEA         | 12.20 | 18.82  | 1.54  |

|                 |          |        |         |      |
|-----------------|----------|--------|---------|------|
| ENSG00000078018 | MAP2     | 1.43   | 2.60    | 1.82 |
| ENSG00000108984 | MAP2K6   | 1.17   | 2.34    | 2.00 |
| ENSG00000139625 | MAP3K12  | 2.53   | 3.89    | 1.54 |
| ENSG00000142733 | MAP3K6   | 1.00   | 1.81    | 1.81 |
| ENSG00000012983 | MAP4K5   | 2.60   | 4.10    | 1.58 |
| ENSG00000188130 | MAPK12   | 4.94   | 7.88    | 1.60 |
| ENSG00000181085 | MAPK15   | 0.79   | 2.26    | 2.87 |
| ENSG00000186868 | MAPT     | 3.96   | 6.09    | 1.54 |
| ENSG00000145416 | 41699    | 1.19   | 1.97    | 1.66 |
| ENSG00000009724 | MASP2    | 0.71   | 1.18    | 1.67 |
| ENSG00000151224 | MAT1A    | 0.89   | 1.60    | 1.80 |
| ENSG00000143384 | MCL1     | 70.21  | 107.22  | 1.53 |
| ENSG00000065328 | MCM10    | 2.45   | 7.56    | 3.08 |
| ENSG00000073111 | MCM2     | 17.20  | 42.21   | 2.45 |
| ENSG00000112118 | MCM3     | 6.83   | 13.31   | 1.95 |
| ENSG00000104738 | MCM4     | 13.95  | 31.93   | 2.29 |
| ENSG00000100297 | MCM5     | 7.97   | 14.13   | 1.77 |
| ENSG00000076003 | MCM6     | 5.64   | 8.92    | 1.58 |
| ENSG00000166508 | MCM7     | 12.52  | 25.69   | 2.05 |
| ENSG00000125885 | MCM8     | 5.38   | 9.44    | 1.75 |
| ENSG00000137337 | MDC1     | 11.52  | 18.78   | 1.63 |
| ENSG00000110492 | MDK      | 49.28  | 86.50   | 1.76 |
| ENSG00000165304 | MELK     | 9.90   | 18.78   | 1.90 |
| ENSG00000176845 | METRNL   | 3.50   | 6.55    | 1.87 |
| ENSG00000185432 | METTL7A  | 15.60  | 26.24   | 1.68 |
| ENSG00000254726 | MEX3A    | 3.17   | 12.88   | 4.07 |
| ENSG00000183496 | MEX3B    | 3.76   | 7.94    | 2.11 |
| ENSG00000181588 | MEX3D    | 12.40  | 33.45   | 2.70 |
| ENSG00000140545 | MFGE8    | 2.16   | 3.33    | 1.55 |
| ENSG00000163975 | MFI2     | 0.82   | 1.45    | 1.77 |
| ENSG00000168389 | MFSD2A   | 1.35   | 2.28    | 1.68 |
| ENSG00000125871 | C20orf72 | 14.98  | 24.65   | 1.65 |
| ENSG00000135596 | MICAL1   | 1.27   | 2.29    | 1.81 |
| ENSG00000133816 | MICAL2   | 3.57   | 7.04    | 1.97 |
| ENSG00000243156 | MICAL3   | 4.21   | 7.82    | 1.86 |
| ENSG00000240972 | MIF      | 599.86 | 1116.65 | 1.86 |
| ENSG00000197182 | FLJ27365 | 1.65   | 2.54    | 1.54 |
| ENSG00000129534 | MIS18BP1 | 1.68   | 3.12    | 1.86 |
| ENSG00000148773 | MKI67    | 5.48   | 16.01   | 2.92 |

|                 |             |       |        |       |
|-----------------|-------------|-------|--------|-------|
| ENSG00000196549 | MME         | 73.53 | 114.49 | 1.56  |
| ENSG00000123342 | MMP19       | 0.06  | 1.34   | 21.14 |
| ENSG00000146263 | MMS22L      | 0.66  | 1.06   | 1.59  |
| ENSG00000121211 | MND1        | 3.98  | 6.94   | 1.74  |
| ENSG00000138587 | MNS1        | 2.26  | 3.77   | 1.67  |
| ENSG00000105926 | MPP6        | 4.32  | 6.56   | 1.52  |
| ENSG00000149573 | MPZL2       | 4.07  | 9.35   | 2.30  |
| ENSG00000184350 | MRGPRES     | 0.32  | 3.31   | 10.49 |
| ENSG00000095002 | MSH2        | 1.99  | 3.26   | 1.63  |
| ENSG00000204410 | MSH5        | 1.73  | 3.82   | 2.21  |
| ENSG00000255152 | MSH5-SAPCD1 | 2.08  | 4.58   | 2.21  |
| ENSG00000135097 | MSH1        | 2.39  | 4.22   | 1.76  |
| ENSG00000173531 | MST1        | 1.63  | 3.27   | 2.01  |
| ENSG00000187193 | MT1X        | 21.15 | 40.87  | 1.93  |
| ENSG00000125148 | MT2A        | 75.07 | 165.17 | 2.20  |
| ENSG00000172167 | MTBP        | 0.84  | 1.49   | 1.78  |
| ENSG00000143033 | MTF2        | 4.55  | 7.21   | 1.59  |
| ENSG00000242114 | MTFP1       | 7.79  | 21.83  | 2.80  |
| ENSG00000146410 | FAM54A      | 0.63  | 1.30   | 2.07  |
| ENSG00000116984 | MTR         | 7.74  | 12.29  | 1.59  |
| ENSG00000176945 | MUC20       | 1.34  | 3.01   | 2.25  |
| ENSG00000119950 | MXI1        | 19.92 | 39.42  | 1.98  |
| ENSG00000101057 | MYBL2       | 17.50 | 29.63  | 1.69  |
| ENSG00000266714 | MYO15B      | 0.73  | 1.23   | 1.70  |
| ENSG00000157483 | MYO1E       | 1.63  | 3.87   | 2.38  |
| ENSG00000162601 | MYSM1       | 6.76  | 11.87  | 1.75  |
| ENSG00000170476 | MZB1        | 1.45  | 2.97   | 2.05  |
| ENSG00000172766 | NAA16       | 3.75  | 5.83   | 1.55  |
| ENSG00000138386 | NAB1        | 1.70  | 3.15   | 1.86  |
| ENSG00000249437 | NAIP        | 2.87  | 6.76   | 2.35  |
| ENSG00000141562 | NARF        | 8.28  | 17.64  | 2.13  |
| ENSG00000132780 | NASP        | 16.52 | 31.59  | 1.91  |
| ENSG00000134369 | NAV1        | 3.66  | 9.15   | 2.50  |
| ENSG00000010292 | NCAPD2      | 24.84 | 40.73  | 1.64  |
| ENSG00000151503 | NCAPD3      | 3.81  | 6.39   | 1.68  |
| ENSG00000109805 | NCAPG       | 5.30  | 11.35  | 2.14  |
| ENSG00000146918 | NCAPG2      | 1.92  | 3.82   | 1.99  |
| ENSG00000121152 | NCAPH       | 5.49  | 13.61  | 2.48  |
| ENSG00000184454 | NCMAP       | 0.70  | 1.09   | 1.56  |

|                 |          |        |        |       |
|-----------------|----------|--------|--------|-------|
| ENSG00000058804 | TMEM48   | 9.58   | 15.85  | 1.65  |
| ENSG00000080986 | NDC80    | 8.03   | 13.58  | 1.69  |
| ENSG00000104419 | NDRG1    | 8.93   | 80.78  | 9.04  |
| ENSG00000185633 | NDUFA4L2 | 6.59   | 203.72 | 30.90 |
| ENSG00000111859 | NEDD9    | 0.93   | 2.22   | 2.38  |
| ENSG00000140398 | NEIL1    | 3.35   | 5.02   | 1.50  |
| ENSG00000109674 | NEIL3    | 2.24   | 4.76   | 2.13  |
| ENSG00000117650 | NEK2     | 6.22   | 10.73  | 1.73  |
| ENSG00000166881 | TMEM194A | 6.59   | 11.49  | 1.74  |
| ENSG00000173848 | NET1     | 24.19  | 38.34  | 1.58  |
| ENSG00000166342 | NETO1    | 16.54  | 32.76  | 1.98  |
| ENSG00000214357 | NEURL1B  | 2.44   | 4.78   | 1.96  |
| ENSG00000170322 | NFRKB    | 10.73  | 18.88  | 1.76  |
| ENSG00000257108 | NHLRC4   | 0.92   | 2.23   | 2.43  |
| ENSG00000084628 | NKAIN1   | 0.20   | 1.23   | 6.26  |
| ENSG00000114857 | NKTR     | 8.32   | 14.40  | 1.73  |
| ENSG00000167034 | NKX3-1   | 168.57 | 256.94 | 1.52  |
| ENSG00000169992 | NLGN2    | 2.02   | 4.56   | 2.26  |
| ENSG00000196338 | NLGN3    | 0.81   | 1.67   | 2.07  |
| ENSG00000140853 | NLRC5    | 0.61   | 1.04   | 1.71  |
| ENSG00000197696 | NMB      | 2.65   | 8.46   | 3.19  |
| ENSG00000053438 | NNAT     | 0.94   | 2.37   | 2.51  |
| ENSG00000164867 | NOS3     | 8.69   | 16.68  | 1.92  |
| ENSG00000074181 | NOTCH3   | 3.03   | 6.08   | 2.01  |
| ENSG00000255346 | NOX5     | 1.23   | 1.87   | 1.53  |
| ENSG00000149308 | NPAT     | 2.11   | 3.69   | 1.74  |
| ENSG00000183979 | NPB      | 1.47   | 2.75   | 1.87  |
| ENSG00000215440 | NPEPL1   | 2.13   | 4.15   | 1.95  |
| ENSG00000163273 | NPPC     | 1.98   | 4.59   | 2.32  |
| ENSG00000183971 | NPW      | 2.97   | 5.00   | 1.68  |
| ENSG00000143257 | NR1I3    | 0.44   | 1.09   | 2.50  |
| ENSG00000123358 | NR4A1    | 3.10   | 6.00   | 1.94  |
| ENSG00000185189 | NRBP2    | 0.92   | 3.32   | 3.61  |
| ENSG00000134986 | NREP     | 4.46   | 14.86  | 3.33  |
| ENSG00000154146 | NRGN     | 2.31   | 3.98   | 1.72  |
| ENSG00000137404 | NRM      | 1.98   | 6.33   | 3.19  |
| ENSG00000168824 | NSG1     | 0.67   | 1.07   | 1.59  |
| ENSG00000101188 | NTSR1    | 0.73   | 1.30   | 1.77  |
| ENSG00000106268 | NUDT1    | 5.35   | 12.41  | 2.32  |

|                 |            |       |        |       |
|-----------------|------------|-------|--------|-------|
| ENSG00000143228 | NUF2       | 3.32  | 9.14   | 2.75  |
| ENSG00000198088 | NUP62CL    | 1.69  | 3.06   | 1.81  |
| ENSG00000137804 | NUSAP1     | 22.58 | 49.42  | 2.19  |
| ENSG00000182379 | NXPH4      | 35.25 | 70.12  | 1.99  |
| ENSG00000111331 | OAS3       | 3.27  | 5.61   | 1.71  |
| ENSG00000154358 | OBSCN      | 1.52  | 2.69   | 1.77  |
| ENSG00000109205 | ODAM       | 0.19  | 1.43   | 7.54  |
| ENSG00000115758 | ODC1       | 77.41 | 119.17 | 1.54  |
| ENSG00000046651 | OFD1       | 2.75  | 4.52   | 1.64  |
| ENSG00000105088 | OLFM2      | 0.87  | 2.92   | 3.37  |
| ENSG00000180785 | OR51E1     | 1.34  | 16.18  | 12.05 |
| ENSG00000085840 | ORC1       | 1.88  | 4.73   | 2.52  |
| ENSG00000091039 | OSBPL8     | 15.77 | 26.00  | 1.65  |
| ENSG00000169914 | OTUD3      | 4.08  | 6.64   | 1.63  |
| ENSG00000180914 | OXTR       | 0.47  | 1.12   | 2.40  |
| ENSG00000090530 | LEPREL1    | 0.45  | 1.09   | 2.44  |
| ENSG00000122884 | P4HA1      | 10.70 | 65.96  | 6.16  |
| ENSG00000124507 | PACSIN1    | 3.22  | 4.85   | 1.50  |
| ENSG00000076641 | PAG1       | 1.30  | 3.10   | 2.38  |
| ENSG00000112941 | PAPD7      | 9.84  | 15.26  | 1.55  |
| ENSG00000162073 | PAQR4      | 11.86 | 21.51  | 1.81  |
| ENSG00000137819 | PAQR5      | 0.61  | 1.08   | 1.75  |
| ENSG00000178184 | PARD6G     | 4.45  | 7.34   | 1.65  |
| ENSG00000267270 | AC139100.2 | 0.87  | 1.47   | 1.70  |
| ENSG00000185480 | PARPBP     | 4.17  | 6.60   | 1.58  |
| ENSG00000159086 | GCFC1      | 2.94  | 5.50   | 1.87  |
| ENSG00000168078 | PBK        | 6.45  | 16.03  | 2.49  |
| ENSG00000197479 | PCDHB11    | 1.14  | 1.82   | 1.60  |
| ENSG00000132646 | PCNA       | 30.32 | 54.50  | 1.80  |
| ENSG00000106333 | PCOLCE     | 0.41  | 1.18   | 2.86  |
| ENSG00000174788 | PCP2       | 0.32  | 1.10   | 3.49  |
| ENSG00000099139 | PCSK5      | 0.33  | 1.06   | 3.19  |
| ENSG00000152256 | PDK1       | 5.48  | 24.00  | 4.38  |
| ENSG00000067992 | PDK3       | 7.68  | 17.24  | 2.24  |
| ENSG00000083642 | PDS5B      | 8.10  | 13.50  | 1.67  |
| ENSG00000241360 | PDXP       | 13.56 | 21.18  | 1.56  |
| ENSG00000067840 | PDZD4      | 0.81  | 1.97   | 2.41  |
| ENSG00000121440 | PDZRN3     | 2.68  | 5.02   | 1.87  |
| ENSG00000134020 | PEBP4      | 0.33  | 1.82   | 5.45  |

|                 |         |        |        |        |
|-----------------|---------|--------|--------|--------|
| ENSG00000179094 | PER1    | 1.76   | 3.63   | 2.06   |
| ENSG00000049246 | PER3    | 4.06   | 6.66   | 1.64   |
| ENSG00000170525 | PFKFB3  | 4.16   | 57.22  | 13.77  |
| ENSG00000114268 | PFKFB4  | 2.09   | 22.40  | 10.70  |
| ENSG00000141959 | PFKL    | 18.84  | 31.42  | 1.67   |
| ENSG00000067057 | PFKP    | 24.51  | 126.89 | 5.18   |
| ENSG00000171314 | PGAM1   | 210.09 | 461.41 | 2.20   |
| ENSG00000096088 | PGC     | 0.88   | 1.70   | 1.93   |
| ENSG00000102144 | PGK1    | 111.95 | 657.28 | 5.87   |
| ENSG00000079739 | PGM1    | 25.95  | 46.47  | 1.79   |
| ENSG00000130517 | PGPEP1  | 13.61  | 20.69  | 1.52   |
| ENSG00000130024 | PHF10   | 8.70   | 16.65  | 1.91   |
| ENSG00000078043 | PIAS2   | 4.48   | 14.39  | 3.21   |
| ENSG00000083535 | PIBF1   | 0.67   | 1.05   | 1.56   |
| ENSG00000177595 | PIDD    | 2.46   | 3.77   | 1.54   |
| ENSG00000140451 | PIF1    | 1.07   | 1.85   | 1.73   |
| ENSG00000137193 | PIM1    | 2.56   | 8.23   | 3.22   |
| ENSG00000102096 | PIM2    | 7.99   | 13.92  | 1.74   |
| ENSG00000067225 | PKM     | 65.83  | 187.14 | 2.84   |
| ENSG00000127564 | PKMYT1  | 2.36   | 4.37   | 1.85   |
| ENSG00000160447 | PKN3    | 0.83   | 1.48   | 1.77   |
| ENSG00000057294 | PKP2    | 1.48   | 2.29   | 1.54   |
| ENSG00000188257 | PLA2G2A | 4.45   | 24.23  | 5.45   |
| ENSG00000159337 | PLA2G4D | 0.19   | 7.37   | 38.01  |
| ENSG00000124181 | PLCG1   | 12.95  | 22.64  | 1.75   |
| ENSG00000169499 | PLEKHA2 | 2.91   | 4.57   | 1.57   |
| ENSG00000106086 | PLEKHA8 | 2.79   | 4.43   | 1.59   |
| ENSG00000090924 | PLEKHG2 | 1.62   | 2.66   | 1.64   |
| ENSG00000126822 | PLEKHG3 | 5.08   | 7.66   | 1.51   |
| ENSG00000196155 | PLEKHG4 | 2.87   | 4.58   | 1.59   |
| ENSG00000023902 | PLEKHO1 | 0.59   | 2.07   | 3.54   |
| ENSG00000183281 | PLGLB1  | 0.95   | 1.85   | 1.95   |
| ENSG00000145632 | PLK2    | 2.51   | 6.03   | 2.41   |
| ENSG00000142731 | PLK4    | 1.92   | 6.84   | 3.57   |
| ENSG00000083444 | PLOD1   | 46.64  | 164.23 | 3.52   |
| ENSG00000152952 | PLOD2   | 0.08   | 9.73   | 128.36 |
| ENSG00000102007 | PLP2    | 10.00  | 15.21  | 1.52   |
| ENSG00000187838 | PLSCR3  | 1.53   | 2.31   | 1.51   |
| ENSG00000164050 | PLXNB1  | 2.28   | 4.10   | 1.80   |

|                 |          |       |       |        |
|-----------------|----------|-------|-------|--------|
| ENSG00000185664 | PMEL     | 0.72  | 1.42  | 1.98   |
| ENSG00000132424 | PNISR    | 5.83  | 10.35 | 1.78   |
| ENSG00000183837 | PNMA3    | 0.77  | 1.69  | 2.18   |
| ENSG00000101868 | POLA1    | 4.89  | 7.62  | 1.56   |
| ENSG00000014138 | POLA2    | 4.84  | 9.15  | 1.89   |
| ENSG00000062822 | POLD1    | 5.03  | 10.62 | 2.11   |
| ENSG00000051341 | POLQ     | 1.17  | 3.85  | 3.29   |
| ENSG00000204531 | POU5F1   | 0.86  | 2.09  | 2.43   |
| ENSG00000143847 | PPFIA4   | 0.16  | 6.33  | 40.26  |
| ENSG00000104881 | PPP1R13L | 1.21  | 2.33  | 1.92   |
| ENSG00000087074 | PPP1R15A | 5.85  | 10.40 | 1.78   |
| ENSG00000146112 | PPP1R18  | 0.80  | 1.40  | 1.74   |
| ENSG00000173281 | PPP1R3B  | 7.02  | 14.27 | 2.03   |
| ENSG00000235194 | PPP1R3E  | 4.68  | 7.84  | 1.68   |
| ENSG00000167393 | PPP2R3B  | 1.01  | 1.74  | 1.73   |
| ENSG00000198901 | PRC1     | 5.66  | 13.05 | 2.31   |
| ENSG00000198056 | PRIM1    | 1.10  | 2.04  | 1.85   |
| ENSG00000188191 | PRKAR1B  | 1.38  | 2.60  | 1.89   |
| ENSG00000154229 | PRKCA    | 2.33  | 3.92  | 1.68   |
| ENSG00000115825 | PRKD3    | 1.99  | 3.81  | 1.91   |
| ENSG00000183943 | PRKX     | 7.46  | 14.91 | 2.00   |
| ENSG00000135406 | PRPH     | 1.63  | 3.98  | 2.44   |
| ENSG00000068489 | PRR11    | 7.81  | 14.31 | 1.83   |
| ENSG00000184838 | PRR16    | 1.40  | 3.96  | 2.83   |
| ENSG00000183248 | FLJ22184 | 8.75  | 20.80 | 2.38   |
| ENSG00000103023 | PRSS54   | 0.00  | 1.45  | 385.37 |
| ENSG00000204264 | PSMB8    | 0.62  | 1.21  | 1.96   |
| ENSG00000131470 | PSMC3IP  | 1.19  | 2.67  | 2.25   |
| ENSG00000134222 | PSRC1    | 3.76  | 7.21  | 1.92   |
| ENSG00000117569 | PTBP2    | 1.15  | 1.72  | 1.50   |
| ENSG00000171522 | PTGER4   | 0.83  | 5.39  | 6.50   |
| ENSG00000213413 | PVRIG    | 1.30  | 2.80  | 2.15   |
| ENSG00000130508 | PXDN     | 2.46  | 5.85  | 2.38   |
| ENSG00000167964 | RAB26    | 19.15 | 33.27 | 1.74   |
| ENSG00000137502 | RAB30    | 2.19  | 3.79  | 1.73   |
| ENSG00000168461 | RAB31    | 1.35  | 4.42  | 3.28   |
| ENSG00000105649 | RAB3A    | 15.55 | 26.01 | 1.67   |
| ENSG00000161800 | RACGAP1  | 5.98  | 11.64 | 1.95   |
| ENSG00000070950 | RAD18    | 1.83  | 3.38  | 1.85   |

|                 |          |       |       |      |
|-----------------|----------|-------|-------|------|
| ENSG00000051180 | RAD51    | 3.14  | 6.38  | 2.03 |
| ENSG00000111247 | RAD51AP1 | 6.82  | 13.97 | 2.05 |
| ENSG00000197275 | RAD54B   | 0.83  | 1.26  | 1.51 |
| ENSG00000085999 | RAD54L   | 4.08  | 9.95  | 2.44 |
| ENSG00000160271 | RALGDS   | 7.65  | 13.40 | 1.75 |
| ENSG00000136237 | RAPGEF5  | 1.20  | 1.95  | 1.63 |
| ENSG00000108352 | RAPGEFL1 | 2.52  | 3.79  | 1.50 |
| ENSG00000077092 | RARB     | 1.25  | 2.01  | 1.61 |
| ENSG00000106538 | RARRES2  | 0.61  | 1.00  | 1.65 |
| ENSG00000155903 | RASA2    | 2.26  | 3.43  | 1.52 |
| ENSG00000101265 | RASSF2   | 0.68  | 3.97  | 5.80 |
| ENSG00000102054 | RBBP7    | 8.47  | 12.90 | 1.52 |
| ENSG00000080839 | RBL1     | 2.14  | 3.66  | 1.71 |
| ENSG00000147274 | RBMX     | 28.63 | 45.07 | 1.57 |
| ENSG00000139194 | RBP5     | 1.49  | 2.44  | 1.64 |
| ENSG00000168214 | RBPJ     | 15.78 | 25.61 | 1.62 |
| ENSG00000166831 | RBPM2    | 0.66  | 1.71  | 2.60 |
| ENSG00000166965 | RCCD1    | 6.31  | 10.24 | 1.62 |
| ENSG00000142552 | RCN3     | 5.35  | 12.09 | 2.26 |
| ENSG00000054967 | RELT     | 0.66  | 1.64  | 2.48 |
| ENSG00000169891 | REPS2    | 8.80  | 18.91 | 2.15 |
| ENSG00000133119 | RFC3     | 16.28 | 36.91 | 2.27 |
| ENSG00000163918 | RFC4     | 4.32  | 7.44  | 1.72 |
| ENSG00000111445 | RFC5     | 12.00 | 20.32 | 1.69 |
| ENSG00000168411 | RFWD3    | 4.20  | 7.67  | 1.83 |
| ENSG00000080298 | RFX3     | 1.37  | 2.50  | 1.83 |
| ENSG00000242732 | RGAG4    | 1.30  | 3.07  | 2.35 |
| ENSG00000159496 | RGL4     | 1.14  | 1.95  | 1.72 |
| ENSG00000076344 | RGS11    | 0.61  | 1.03  | 1.68 |
| ENSG00000159788 | RGS12    | 1.96  | 3.09  | 1.58 |
| ENSG00000164292 | RHOBTB3  | 0.75  | 2.42  | 3.24 |
| ENSG00000166405 | RIC3     | 1.27  | 1.92  | 1.51 |
| ENSG00000080345 | RIF1     | 3.00  | 4.80  | 1.60 |
| ENSG00000188026 | RILPL1   | 1.77  | 3.30  | 1.87 |
| ENSG00000177181 | RIMKLA   | 3.51  | 14.73 | 4.20 |
| ENSG00000166532 | RIMKLB   | 2.97  | 4.76  | 1.61 |
| ENSG00000132669 | RIN2     | 2.69  | 7.61  | 2.83 |
| ENSG00000175643 | RMI2     | 4.17  | 8.42  | 2.02 |
| ENSG00000258818 | RNASE4   | 6.82  | 12.92 | 1.89 |



|                 |          |        |        |       |
|-----------------|----------|--------|--------|-------|
| ENSG00000104889 | RNASEH2A | 19.26  | 40.19  | 2.09  |
| ENSG00000151692 | RNF144A  | 5.40   | 9.61   | 1.78  |
| ENSG00000141622 | RNF165   | 0.57   | 1.09   | 1.90  |
| ENSG00000101236 | RNF24    | 8.75   | 13.18  | 1.51  |
| ENSG00000204618 | RNF39    | 0.55   | 1.10   | 2.00  |
| ENSG00000108375 | RNF43    | 2.91   | 7.78   | 2.67  |
| ENSG00000069667 | RORA     | 0.27   | 1.01   | 3.75  |
| ENSG00000129824 | RPS4Y1   | 160.31 | 243.86 | 1.52  |
| ENSG00000083750 | RRAGB    | 4.64   | 9.01   | 1.94  |
| ENSG00000025039 | RRAGD    | 3.64   | 5.60   | 1.54  |
| ENSG00000167325 | RRM1     | 27.36  | 54.81  | 2.00  |
| ENSG00000171848 | RRM2     | 13.11  | 56.94  | 4.34  |
| ENSG00000081019 | RSBN1    | 6.13   | 9.45   | 1.54  |
| ENSG00000182010 | RTKN2    | 0.91   | 2.22   | 2.45  |
| ENSG00000197747 | S100A10  | 0.32   | 1.94   | 6.02  |
| ENSG00000213694 | S1PR3    | 1.32   | 6.33   | 4.79  |
| ENSG00000151835 | SACS     | 1.85   | 6.76   | 3.65  |
| ENSG00000164105 | SAP30    | 3.34   | 7.08   | 2.12  |
| ENSG00000228727 | SAPCD1   | 0.58   | 1.53   | 2.66  |
| ENSG00000156876 | SASS6    | 1.68   | 3.60   | 2.15  |
| ENSG00000073060 | SCARB1   | 9.73   | 17.27  | 1.77  |
| ENSG00000145284 | SCD5     | 5.33   | 10.23  | 1.92  |
| ENSG00000132330 | SCLY     | 1.15   | 2.25   | 1.95  |
| ENSG00000168447 | SCNN1B   | 0.25   | 3.47   | 13.74 |
| ENSG00000169439 | SDC2     | 2.08   | 8.87   | 4.26  |
| ENSG00000100003 | SEC14L2  | 1.58   | 2.65   | 1.67  |
| ENSG00000075223 | SEMA3C   | 2.31   | 5.39   | 2.33  |
| ENSG00000185033 | SEMA4B   | 6.40   | 10.16  | 1.59  |
| ENSG00000168758 | SEMA4C   | 1.65   | 3.54   | 2.15  |
| ENSG00000095539 | SEMA4G   | 0.85   | 1.59   | 1.87  |
| ENSG00000100167 | 41885    | 9.18   | 28.82  | 3.14  |
| ENSG00000183569 | SERHL2   | 2.14   | 4.03   | 1.88  |
| ENSG00000168528 | SERINC2  | 41.08  | 62.59  | 1.52  |
| ENSG00000163536 | SERPINI1 | 1.68   | 2.69   | 1.60  |
| ENSG00000149212 | SESN3    | 20.46  | 37.04  | 1.81  |
| ENSG00000187231 | SESTD1   | 1.16   | 2.06   | 1.77  |
| ENSG00000152217 | SETBP1   | 3.92   | 6.02   | 1.53  |
| ENSG00000116560 | SFPQ     | 18.11  | 33.74  | 1.86  |
| ENSG00000107819 | SFXN3    | 10.78  | 29.47  | 2.73  |

|                 |          |       |        |       |
|-----------------|----------|-------|--------|-------|
| ENSG00000129810 | SGOL1    | 1.34  | 3.00   | 2.24  |
| ENSG00000163535 | SGOL2    | 1.82  | 4.24   | 2.33  |
| ENSG00000160999 | SH2B2    | 2.01  | 3.86   | 1.92  |
| ENSG00000100092 | SH3BP1   | 7.39  | 11.15  | 1.51  |
| ENSG00000214193 | SH3D21   | 2.03  | 6.27   | 3.08  |
| ENSG00000251322 | SHANK3   | 3.55  | 6.13   | 1.73  |
| ENSG00000171241 | SHCBP1   | 3.93  | 6.52   | 1.66  |
| ENSG00000116991 | SIPA1L2  | 17.40 | 33.96  | 1.95  |
| ENSG00000126778 | SIX1     | 1.85  | 3.20   | 1.74  |
| ENSG00000165480 | SKA3     | 2.07  | 3.55   | 1.72  |
| ENSG00000145604 | SKP2     | 9.74  | 18.21  | 1.87  |
| ENSG00000064651 | SLC12A2  | 8.84  | 13.77  | 1.56  |
| ENSG00000112394 | SLC16A10 | 1.94  | 3.17   | 1.64  |
| ENSG00000141526 | SLC16A3  | 0.51  | 8.26   | 16.27 |
| ENSG00000106688 | SLC1A1   | 3.73  | 8.13   | 2.18  |
| ENSG00000153291 | SLC25A27 | 3.31  | 5.03   | 1.52  |
| ENSG00000197119 | SLC25A29 | 10.96 | 22.54  | 2.06  |
| ENSG00000075303 | SLC25A40 | 4.17  | 6.41   | 1.54  |
| ENSG00000112759 | SLC29A1  | 4.31  | 9.74   | 2.26  |
| ENSG00000164638 | SLC29A4  | 4.37  | 6.78   | 1.55  |
| ENSG00000117394 | SLC2A1   | 16.54 | 49.30  | 2.98  |
| ENSG00000181856 | SLC2A4   | 1.32  | 2.70   | 2.05  |
| ENSG00000138821 | SLC39A8  | 2.57  | 9.79   | 3.81  |
| ENSG00000138449 | SLC40A1  | 0.64  | 1.39   | 2.18  |
| ENSG00000033867 | SLC4A7   | 5.16  | 8.08   | 1.57  |
| ENSG00000063127 | SLC6A16  | 0.34  | 1.04   | 3.02  |
| ENSG00000131389 | SLC6A6   | 1.85  | 4.68   | 2.52  |
| ENSG00000130821 | SLC6A8   | 48.52 | 101.82 | 2.10  |
| ENSG00000101187 | SLCO4A1  | 11.42 | 17.45  | 1.53  |
| ENSG00000137571 | SLCO5A1  | 1.06  | 2.36   | 2.23  |
| ENSG00000133302 | ANKRD32  | 1.61  | 2.60   | 1.61  |
| ENSG00000121871 | SLITRK3  | 0.67  | 1.07   | 1.59  |
| ENSG00000137834 | SMAD6    | 3.19  | 5.98   | 1.87  |
| ENSG00000136824 | SMC2     | 5.43  | 13.89  | 2.56  |
| ENSG00000108055 | SMC3     | 19.19 | 29.51  | 1.54  |
| ENSG00000113810 | SMC4     | 7.49  | 17.30  | 2.31  |
| ENSG00000183963 | SMTN     | 4.88  | 7.44   | 1.52  |
| ENSG00000143499 | SMYD2    | 2.06  | 5.08   | 2.46  |
| ENSG00000164975 | SNAPC3   | 10.59 | 16.84  | 1.59  |

|                 |          |       |        |       |
|-----------------|----------|-------|--------|-------|
| ENSG00000214265 | SNURF    | 2.81  | 5.22   | 1.86  |
| ENSG00000109762 | SNX25    | 8.40  | 13.56  | 1.61  |
| ENSG00000134243 | SORT1    | 3.72  | 6.20   | 1.66  |
| ENSG00000124766 | SOX4     | 34.13 | 149.50 | 4.38  |
| ENSG00000189120 | SP6      | 1.91  | 4.06   | 2.13  |
| ENSG00000076382 | SPAG5    | 4.71  | 8.49   | 1.80  |
| ENSG00000161888 | SPC24    | 8.57  | 25.38  | 2.96  |
| ENSG00000152253 | SPC25    | 3.22  | 7.24   | 2.25  |
| ENSG00000205238 | SPDYE2   | 1.40  | 2.65   | 1.89  |
| ENSG00000176170 | SPHK1    | 1.47  | 3.11   | 2.12  |
| ENSG00000269404 | SPIB     | 0.75  | 1.31   | 1.75  |
| ENSG00000163611 | SPICE1   | 1.49  | 2.49   | 1.67  |
| ENSG00000164056 | SPRY1    | 4.01  | 8.58   | 2.14  |
| ENSG00000184402 | SS18L1   | 15.03 | 22.63  | 1.51  |
| ENSG00000117155 | SSX2IP   | 5.94  | 9.68   | 1.63  |
| ENSG00000110080 | ST3GAL4  | 6.29  | 14.04  | 2.23  |
| ENSG00000185482 | STAC3    | 0.77  | 1.53   | 1.99  |
| ENSG00000164211 | STARD4   | 5.36  | 9.21   | 1.72  |
| ENSG00000173757 | STAT5B   | 6.89  | 10.62  | 1.54  |
| ENSG00000118804 | STBD1    | 4.71  | 7.61   | 1.62  |
| ENSG00000159167 | STC1     | 0.15  | 13.69  | 89.67 |
| ENSG00000123473 | STIL     | 1.73  | 3.33   | 1.92  |
| ENSG00000117632 | STMN1    | 9.64  | 23.34  | 2.42  |
| ENSG00000015592 | STMN4    | 0.19  | 1.22   | 6.62  |
| ENSG00000261052 | SULT1A3  | 0.67  | 1.12   | 1.66  |
| ENSG00000088002 | SULT2B1  | 5.72  | 8.81   | 1.54  |
| ENSG00000099994 | SUSD2    | 1.05  | 1.94   | 1.85  |
| ENSG00000101945 | SUV39H1  | 3.63  | 5.96   | 1.64  |
| ENSG00000152455 | SUV39H2  | 4.16  | 6.61   | 1.59  |
| ENSG00000133247 | SUV420H2 | 4.34  | 6.64   | 1.53  |
| ENSG00000161860 | SYCE2    | 1.36  | 2.84   | 2.09  |
| ENSG00000132872 | SYT4     | 1.88  | 7.12   | 3.79  |
| ENSG00000011347 | SYT7     | 11.26 | 21.20  | 1.88  |
| ENSG00000137501 | SYTL2    | 0.67  | 1.48   | 2.20  |
| ENSG00000013810 | TACC3    | 18.68 | 31.32  | 1.68  |
| ENSG00000149591 | TAGLN    | 2.58  | 4.07   | 1.58  |
| ENSG00000185418 | TARSL2   | 1.81  | 2.93   | 1.62  |
| ENSG00000177565 | TBL1XR1  | 35.47 | 58.19  | 1.64  |
| ENSG00000028839 | TBPL1    | 8.94  | 13.74  | 1.54  |

|                 |           |       |        |       |
|-----------------|-----------|-------|--------|-------|
| ENSG00000170379 | FAM115C   | 0.56  | 2.35   | 4.22  |
| ENSG00000196507 | TCEAL3    | 17.34 | 29.28  | 1.69  |
| ENSG00000137310 | TCF19     | 9.32  | 16.55  | 1.78  |
| ENSG00000042088 | TDP1      | 7.03  | 11.11  | 1.58  |
| ENSG00000074219 | TEAD2     | 1.60  | 5.09   | 3.17  |
| ENSG00000009694 | TENM1     | 3.85  | 8.12   | 2.11  |
| ENSG00000164362 | TERT      | 0.27  | 1.53   | 5.75  |
| ENSG00000219435 | C11orf20  | 1.03  | 2.44   | 2.37  |
| ENSG00000160180 | TFF3      | 1.57  | 4.64   | 2.96  |
| ENSG00000003436 | TFPI      | 10.37 | 16.12  | 1.55  |
| ENSG00000069702 | TGFBR3    | 2.05  | 3.66   | 1.79  |
| ENSG00000118707 | TGIF2     | 12.61 | 20.26  | 1.61  |
| ENSG00000173451 | THAP2     | 0.77  | 1.30   | 1.70  |
| ENSG00000051596 | THOC3     | 5.87  | 9.59   | 1.63  |
| ENSG00000116001 | TIA1      | 5.30  | 8.23   | 1.55  |
| ENSG00000140534 | TICRR     | 1.34  | 5.44   | 4.07  |
| ENSG00000145365 | TIFA      | 4.30  | 9.21   | 2.14  |
| ENSG00000035862 | TIMP2     | 15.54 | 24.78  | 1.59  |
| ENSG00000167900 | TK1       | 23.42 | 42.51  | 1.82  |
| ENSG00000065717 | TLE2      | 0.97  | 1.62   | 1.67  |
| ENSG00000169908 | TM4SF1    | 0.28  | 12.70  | 44.60 |
| ENSG00000144339 | TMEFF2    | 5.44  | 11.60  | 2.13  |
| ENSG00000166292 | TMEM100   | 0.12  | 2.54   | 21.03 |
| ENSG00000179029 | TMEM107   | 4.66  | 7.92   | 1.70  |
| ENSG00000152558 | TMEM123   | 75.50 | 130.05 | 1.72  |
| ENSG00000006118 | TMEM132A  | 27.52 | 46.58  | 1.69  |
| ENSG00000138111 | TMEM180   | 2.55  | 3.91   | 1.53  |
| ENSG00000214128 | TMEM213   | 0.73  | 1.29   | 1.78  |
| ENSG00000151715 | TMEM45B   | 7.94  | 14.95  | 1.88  |
| ENSG00000105696 | TMEM59L   | 1.73  | 4.66   | 2.70  |
| ENSG00000125895 | TMEM74B   | 0.29  | 1.97   | 6.84  |
| ENSG00000109084 | TMEM97    | 33.92 | 67.65  | 1.99  |
| ENSG00000120802 | TMPO      | 18.21 | 31.11  | 1.71  |
| ENSG00000087128 | TMPRSS11E | 1.88  | 6.08   | 3.24  |
| ENSG00000184012 | TMPRSS2   | 52.81 | 101.93 | 1.93  |
| ENSG00000205542 | TMSB4X    | 18.60 | 37.98  | 2.04  |
| ENSG00000185215 | TNFAIP2   | 0.53  | 1.28   | 2.41  |
| ENSG00000006327 | TNFRSF12A | 15.18 | 23.11  | 1.52  |
| ENSG00000127863 | TNFRSF19  | 14.31 | 38.47  | 2.69  |

|                 |          |        |        |      |
|-----------------|----------|--------|--------|------|
| ENSG00000215788 | TNFRSF25 | 0.60   | 1.11   | 1.86 |
| ENSG00000121858 | TNFSF10  | 0.52   | 1.38   | 2.66 |
| ENSG00000160949 | TONSL    | 2.57   | 4.24   | 1.65 |
| ENSG00000131747 | TOP2A    | 4.42   | 13.31  | 3.01 |
| ENSG00000177302 | TOP3A    | 3.73   | 6.58   | 1.76 |
| ENSG00000163781 | TOPBP1   | 3.99   | 7.38   | 1.85 |
| ENSG00000175274 | TP53I11  | 14.88  | 25.49  | 1.71 |
| ENSG00000078900 | TP73     | 0.99   | 1.68   | 1.69 |
| ENSG00000111669 | TPI1     | 266.90 | 632.56 | 2.37 |
| ENSG00000088325 | TPX2     | 20.29  | 36.06  | 1.78 |
| ENSG00000183763 | TRAIP    | 1.19   | 1.95   | 1.65 |
| ENSG00000173626 | BET3L    | 1.03   | 1.81   | 1.75 |
| ENSG00000132274 | TRIM22   | 2.23   | 3.43   | 1.54 |
| ENSG00000038382 | TRIO     | 4.95   | 8.43   | 1.70 |
| ENSG00000125733 | TRIP10   | 6.43   | 10.25  | 1.60 |
| ENSG00000071539 | TRIP13   | 8.14   | 17.74  | 2.18 |
| ENSG00000135451 | TROAP    | 6.65   | 11.34  | 1.71 |
| ENSG00000144481 | TRPM8    | 1.21   | 10.04  | 8.28 |
| ENSG00000162526 | TSSK3    | 1.47   | 2.41   | 1.64 |
| ENSG00000168026 | TTC21A   | 0.75   | 1.25   | 1.66 |
| ENSG00000182670 | TTC3     | 11.43  | 17.52  | 1.53 |
| ENSG00000112742 | TTK      | 1.91   | 4.86   | 2.55 |
| ENSG00000214021 | TTLL3    | 2.75   | 4.67   | 1.70 |
| ENSG00000137941 | TTLL7    | 1.11   | 1.95   | 1.75 |
| ENSG00000136295 | TTYH3    | 13.55  | 21.48  | 1.59 |
| ENSG00000167552 | TUBA1A   | 1.69   | 7.91   | 4.68 |
| ENSG00000123416 | TUBA1B   | 81.72  | 138.89 | 1.70 |
| ENSG00000075886 | TUBA3D   | 2.37   | 4.99   | 2.11 |
| ENSG00000196230 | TUBB     | 257.21 | 488.59 | 1.90 |
| ENSG00000258947 | TUBB3    | 3.50   | 14.43  | 4.12 |
| ENSG00000104833 | TUBB4A   | 1.93   | 3.30   | 1.70 |
| ENSG00000176014 | TUBB6    | 2.11   | 4.83   | 2.29 |
| ENSG00000122691 | TWIST1   | 3.13   | 5.17   | 1.65 |
| ENSG00000087301 | TXNDC16  | 3.49   | 5.37   | 1.54 |
| ENSG00000176890 | TYMS     | 21.91  | 71.89  | 3.28 |
| ENSG00000176912 | C18orf56 | 7.57   | 14.05  | 1.86 |
| ENSG00000175063 | UBE2C    | 23.88  | 51.75  | 2.17 |
| ENSG00000156587 | UBE2L6   | 1.11   | 2.00   | 1.81 |
| ENSG00000077152 | UBE2T    | 7.13   | 16.84  | 2.36 |

|                 |         |       |       |      |
|-----------------|---------|-------|-------|------|
| ENSG00000109775 | UFSP2   | 2.91  | 5.93  | 2.04 |
| ENSG00000162738 | VANGL2  | 1.53  | 3.05  | 1.99 |
| ENSG00000143494 | VASH2   | 1.40  | 4.40  | 3.14 |
| ENSG00000112715 | VEGFA   | 23.20 | 50.43 | 2.17 |
| ENSG00000173511 | VEGFB   | 7.52  | 44.42 | 5.91 |
| ENSG00000026025 | VIM     | 3.58  | 13.57 | 3.79 |
| ENSG00000114812 | VIPR1   | 5.34  | 8.04  | 1.51 |
| ENSG00000167397 | VKORC1  | 18.10 | 34.75 | 1.92 |
| ENSG00000147852 | VLDLR   | 4.09  | 7.55  | 1.84 |
| ENSG00000197969 | VPS13A  | 5.57  | 9.75  | 1.75 |
| ENSG00000139722 | VPS37B  | 20.36 | 31.94 | 1.57 |
| ENSG00000100749 | VRK1    | 6.35  | 10.34 | 1.63 |
| ENSG00000132821 | VSTM2L  | 1.77  | 6.01  | 3.39 |
| ENSG00000185222 | WBP5    | 39.35 | 60.08 | 1.53 |
| ENSG00000198554 | WDHD1   | 1.54  | 2.98  | 1.93 |
| ENSG00000184465 | WDR27   | 1.06  | 1.92  | 1.82 |
| ENSG00000005448 | WDR54   | 5.23  | 9.31  | 1.78 |
| ENSG00000075702 | WDR62   | 1.45  | 2.69  | 1.85 |
| ENSG00000158023 | WDR66   | 0.83  | 1.72  | 2.05 |
| ENSG00000092470 | WDR76   | 3.10  | 5.56  | 1.79 |
| ENSG00000166483 | WEE1    | 6.62  | 13.97 | 2.11 |
| ENSG00000109685 | WHSC1   | 9.32  | 15.35 | 1.65 |
| ENSG00000116729 | WLS     | 3.03  | 5.51  | 1.82 |
| ENSG00000109046 | WSB1    | 19.45 | 35.72 | 1.84 |
| ENSG00000196584 | XRCC2   | 3.56  | 7.78  | 2.18 |
| ENSG00000163872 | YEATS2  | 10.18 | 18.06 | 1.77 |
| ENSG00000100027 | YPEL1   | 1.42  | 5.30  | 3.74 |
| ENSG00000179059 | ZFP42   | 0.57  | 1.05  | 1.84 |
| ENSG00000138658 | C4orf21 | 0.36  | 1.16  | 3.21 |
| ENSG00000108175 | ZMIZ1   | 20.22 | 33.16 | 1.64 |
| ENSG00000197020 | ZNF100  | 3.35  | 5.28  | 1.58 |
| ENSG00000196418 | ZNF124  | 2.54  | 4.43  | 1.74 |
| ENSG00000131127 | ZNF141  | 3.28  | 6.28  | 1.92 |
| ENSG00000170949 | ZNF160  | 4.12  | 8.06  | 1.96 |
| ENSG00000096654 | ZNF184  | 2.93  | 4.57  | 1.56 |
| ENSG00000005801 | ZNF195  | 6.12  | 9.79  | 1.60 |
| ENSG00000149050 | ZNF214  | 1.15  | 1.84  | 1.60 |
| ENSG00000159905 | ZNF221  | 1.07  | 1.96  | 1.83 |
| ENSG00000167840 | ZNF232  | 7.00  | 11.36 | 1.62 |

|                 |          |       |       |      |
|-----------------|----------|-------|-------|------|
| ENSG00000196150 | ZNF250   | 1.30  | 2.07  | 1.60 |
| ENSG00000213096 | ZNF254   | 6.46  | 9.74  | 1.51 |
| ENSG00000198039 | ZNF273   | 1.85  | 3.32  | 1.79 |
| ENSG00000249459 | ZNF286B  | 1.32  | 2.14  | 1.62 |
| ENSG00000188994 | ZNF292   | 1.07  | 3.79  | 3.53 |
| ENSG00000130684 | ZNF337   | 6.41  | 11.29 | 1.76 |
| ENSG00000178338 | ZNF354B  | 3.80  | 6.55  | 1.72 |
| ENSG00000144331 | ZNF385B  | 0.85  | 1.43  | 1.69 |
| ENSG00000186918 | ZNF395   | 4.60  | 19.03 | 4.14 |
| ENSG00000198466 | ZNF587   | 14.12 | 21.92 | 1.55 |
| ENSG00000198521 | ZNF43    | 4.13  | 6.62  | 1.60 |
| ENSG00000118620 | ZNF430   | 2.62  | 3.96  | 1.51 |
| ENSG00000196705 | ZNF431   | 4.29  | 7.03  | 1.64 |
| ENSG00000249087 | C1orf213 | 0.94  | 1.44  | 1.53 |
| ENSG00000180855 | ZNF443   | 2.09  | 3.18  | 1.52 |
| ENSG00000178187 | ZNF454   | 1.75  | 3.16  | 1.81 |
| ENSG00000173258 | ZNF483   | 1.33  | 2.23  | 1.68 |
| ENSG00000175322 | ZNF519   | 0.46  | 1.08  | 2.33 |
| ENSG00000203326 | ZNF525   | 3.98  | 7.07  | 1.78 |
| ENSG00000183647 | ZNF530   | 2.33  | 3.69  | 1.58 |
| ENSG00000074657 | ZNF532   | 10.17 | 16.00 | 1.57 |
| ENSG00000213020 | ZNF611   | 2.28  | 3.47  | 1.52 |
| ENSG00000160229 | ZNF66P   | 1.30  | 2.43  | 1.88 |
| ENSG00000198046 | ZNF667   | 3.83  | 6.33  | 1.65 |
| ENSG00000188295 | ZNF669   | 4.26  | 6.62  | 1.55 |
| ENSG00000197372 | ZNF675   | 2.41  | 3.85  | 1.59 |
| ENSG00000164684 | ZNF704   | 1.58  | 2.39  | 1.51 |
| ENSG00000182141 | ZNF708   | 5.05  | 8.37  | 1.66 |
| ENSG00000196081 | ZNF724P  | 1.48  | 3.17  | 2.14 |
| ENSG00000183850 | ZNF730   | 1.87  | 3.58  | 1.91 |
| ENSG00000237440 | ZNF737   | 5.81  | 9.28  | 1.60 |
| ENSG00000172687 | ZNF738   | 2.81  | 5.91  | 2.11 |
| ENSG00000214189 | ZNF788   | 0.72  | 1.22  | 1.70 |
| ENSG00000167766 | ZNF83    | 9.03  | 14.35 | 1.59 |
| ENSG00000198040 | ZNF84    | 8.78  | 16.55 | 1.89 |
| ENSG00000178917 | ZNF852   | 4.70  | 7.57  | 1.61 |
| ENSG00000214029 | ZNF891   | 2.74  | 4.36  | 1.59 |
| ENSG00000146757 | ZNF92    | 4.34  | 8.49  | 1.95 |
| ENSG00000184635 | ZNF93    | 0.92  | 2.15  | 2.34 |

|                 |               |       |        |       |
|-----------------|---------------|-------|--------|-------|
| ENSG00000149506 | ZP1           | 0.29  | 1.18   | 4.13  |
| ENSG00000176371 | ZSCAN2        | 4.88  | 10.31  | 2.11  |
| ENSG00000187987 | ZSCAN23       | 1.84  | 3.84   | 2.09  |
| ENSG00000132003 | ZSWIM4        | 2.50  | 3.88   | 1.55  |
| ENSG00000174442 | ZWILCH        | 8.53  | 13.06  | 1.53  |
| ENSG00000122952 | ZWINT         | 9.59  | 25.75  | 2.69  |
| ENSG00000203995 | ZYG11A        | 0.71  | 1.07   | 1.51  |
| ENSG00000196644 | GPR89C        | 3.11  | 4.76   | 1.53  |
| ENSG00000255054 | RP1-317E23.6  | 1.85  | 3.29   | 1.78  |
| ENSG00000255062 | RP11-712L6.5  | 0.13  | 3.19   | 23.68 |
| ENSG00000187951 | ARHGAP11B     | 1.64  | 2.65   | 1.61  |
| ENSG00000255439 | VKORC1        | 5.70  | 11.00  | 1.93  |
| ENSG00000017373 | SRCIN1        | 1.56  | 2.71   | 1.73  |
| ENSG00000187456 | RDM1          | 1.11  | 2.04   | 1.84  |
| ENSG00000197813 | AC011450.1    | 1.25  | 3.86   | 3.08  |
| ENSG00000223802 | CERS1         | 4.32  | 9.26   | 2.14  |
| ENSG00000266953 | RP11-618P17.4 | 45.08 | 134.74 | 2.99  |
| ENSG00000267740 | AC024592.12   | 0.16  | 4.11   | 26.37 |
| ENSG00000268193 | AC002985.3    | 0.76  | 1.87   | 2.48  |
| ENSG00000249590 | RP4-539M6.19  | 8.63  | 15.46  | 1.79  |
| ENSG00000206532 | RP11-553A10.1 | 1.16  | 2.01   | 1.74  |
| ENSG00000229729 | RP11-159G9.5  | 3.36  | 5.73   | 1.70  |
| ENSG00000214597 | TMEM249       | 0.78  | 1.51   | 1.93  |
| ENSG00000225885 | AC023590.1    | 0.85  | 1.54   | 1.81  |
| ENSG00000157950 | SSX2B         | 1.09  | 1.90   | 1.75  |
| ENSG00000205664 | RP11-706O15.1 | 6.00  | 9.61   | 1.60  |



**Supplementary Table S2: HypoxiaXshREST up M**

| Gene ID         | Gene Symbol | LNCaP-shREST |       |       | Fold change |      |
|-----------------|-------------|--------------|-------|-------|-------------|------|
|                 |             | 0 day        | 3 day | 6 day | 3/0         | 6/0  |
| ENSG00000009724 | MASP2       | 1.14         | 1.74  | 1.84  | 1.53        | 1.61 |
| ENSG00000069812 | HES2        | 1.24         | 1.67  | 1.86  | 1.35        | 1.50 |
| ENSG00000077585 | GPR137B     | 4.18         | 3.75  | 6.92  | 0.90        | 1.66 |
| ENSG00000116729 | WLS         | 5.88         | 9.11  | 9.06  | 1.55        | 1.54 |
| ENSG00000116991 | SIPA1L2     | 14.23        | 22.92 | 21.54 | 1.61        | 1.51 |
| ENSG00000118292 | C1orf54     | 0.41         | 0.89  | 1.41  | 2.17        | 3.44 |
| ENSG00000134698 | EIF2C4      | 4.43         | 7.28  | 7.23  | 1.64        | 1.63 |
| ENSG00000135766 | EGLN1       | 9.93         | 15.42 | 14.15 | 1.55        | 1.42 |
| ENSG00000143387 | CTSK        | 1.76         | 2.82  | 3.59  | 1.60        | 2.04 |
| ENSG00000154358 | OBSCN       | 1.41         | 2.66  | 3.45  | 1.89        | 2.45 |
| ENSG00000159388 | BTG2        | 14.95        | 29.85 | 25.03 | 2.00        | 1.67 |
| ENSG00000162496 | DHRS3       | 0.97         | 2.85  | 3.48  | 2.94        | 3.59 |
| ENSG00000162526 | TSSK3       | 1.84         | 2.55  | 3.16  | 1.39        | 1.72 |
| ENSG00000162738 | VANGL2      | 1.81         | 2.95  | 3.07  | 1.63        | 1.70 |
| ENSG00000168243 | GNG4        | 1.12         | 1.63  | 2.18  | 1.46        | 1.95 |
| ENSG00000171385 | KCND3       | 1.17         | 2.51  | 3.61  | 2.15        | 3.09 |
| ENSG00000177181 | RIMKLA      | 3.85         | 4.68  | 6.57  | 1.22        | 1.71 |
| ENSG00000186973 | FAM183A     | 0.48         | 0.79  | 1.00  | 1.65        | 2.08 |
| ENSG00000188257 | PLA2G2A     | 0.34         | 0.62  | 1.38  | 1.82        | 4.06 |
| ENSG00000197520 | FAM177B     | 0.83         | 1.19  | 1.51  | 1.43        | 1.82 |
| ENSG00000214193 | SH3D21      | 1.18         | 1.83  | 3.35  | 1.55        | 2.84 |
| ENSG00000215788 | TNFRSF25    | 0.87         | 1.19  | 2.04  | 1.37        | 2.34 |
| ENSG00000240038 | AMY2B       | 0.72         | 1.13  | 1.28  | 1.57        | 1.78 |
| ENSG00000026025 | VIM         | 0.68         | 0.80  | 1.21  | 1.18        | 1.78 |
| ENSG00000108175 | ZMIZ1       | 16.51        | 22.80 | 29.19 | 1.38        | 1.77 |
| ENSG00000108242 | CYP2C18     | 0.95         | 1.92  | 1.98  | 2.02        | 2.08 |
| ENSG00000119946 | CNNM1       | 1.23         | 1.65  | 2.53  | 1.34        | 2.06 |
| ENSG00000119950 | MXI1        | 8.07         | 16.29 | 16.25 | 2.02        | 2.01 |
| ENSG00000122884 | P4HA1       | 15.70        | 15.41 | 29.65 | 0.98        | 1.89 |
| ENSG00000138109 | CYP2C9      | 4.06         | 9.22  | 9.77  | 2.27        | 2.41 |
| ENSG00000138111 | TMEM180     | 2.57         | 3.50  | 4.75  | 1.36        | 1.85 |
| ENSG00000138166 | DUSP5       | 0.70         | 1.38  | 1.40  | 1.97        | 2.00 |
| ENSG00000151640 | DPYSL4      | 2.36         | 6.56  | 9.26  | 2.78        | 3.92 |
| ENSG00000171988 | JMJD1C      | 7.08         | 13.91 | 12.61 | 1.96        | 1.78 |
| ENSG00000011347 | SYT7        | 7.65         | 7.59  | 12.18 | 0.99        | 1.59 |
| ENSG00000023445 | BIRC3       | 0.81         | 1.37  | 1.84  | 1.69        | 2.27 |

|                 |               |       |       |       |       |        |
|-----------------|---------------|-------|-------|-------|-------|--------|
| ENSG00000080854 | IGSF9B        | 1.06  | 1.56  | 2.04  | 1.47  | 1.92   |
| ENSG00000110492 | MDK           | 33.75 | 52.40 | 55.47 | 1.55  | 1.64   |
| ENSG00000132274 | TRIM22        | 1.71  | 3.61  | 3.77  | 2.11  | 2.20   |
| ENSG00000137501 | SYTL2         | 0.84  | 2.04  | 2.03  | 2.43  | 2.42   |
| ENSG00000137502 | RAB30         | 1.64  | 2.64  | 2.73  | 1.61  | 1.66   |
| ENSG00000149050 | ZNF214        | 1.15  | 1.80  | 1.98  | 1.57  | 1.72   |
| ENSG00000149212 | SESN3         | 20.35 | 39.35 | 44.26 | 1.93  | 2.17   |
| ENSG00000149591 | TAGLN         | 1.53  | 2.27  | 2.98  | 1.48  | 1.95   |
| ENSG00000151715 | TMEM45B       | 2.35  | 2.21  | 3.59  | 0.94  | 1.53   |
| ENSG00000166405 | RIC3          | 1.65  | 3.80  | 4.12  | 2.30  | 2.50   |
| ENSG00000173511 | VEGFB         | 5.87  | 8.40  | 12.51 | 1.43  | 2.13   |
| ENSG00000175274 | TP53I11       | 7.67  | 11.30 | 13.56 | 1.47  | 1.77   |
| ENSG00000179240 | RP11-111M22.2 | 1.45  | 2.02  | 2.51  | 1.39  | 1.73   |
| ENSG00000187398 | LUZP2         | 4.19  | 6.97  | 7.29  | 1.66  | 1.74   |
| ENSG00000196167 | C11orf92      | 7.12  | 11.13 | 16.36 | 1.56  | 2.30   |
| ENSG00000111674 | ENO2          | 3.52  | 5.17  | 10.18 | 1.47  | 2.89   |
| ENSG00000123384 | LRP1          | 1.06  | 2.36  | 2.83  | 2.23  | 2.67   |
| ENSG00000135406 | PRPH          | 1.18  | 1.40  | 2.45  | 1.19  | 2.08   |
| ENSG00000135469 | COQ10A        | 3.31  | 4.77  | 5.89  | 1.44  | 1.78   |
| ENSG00000139194 | RBP5          | 1.20  | 1.83  | 2.11  | 1.53  | 1.76   |
| ENSG00000139625 | MAP3K12       | 2.69  | 4.78  | 6.64  | 1.78  | 2.47   |
| ENSG00000158023 | WDR66         | 0.73  | 1.15  | 1.22  | 1.58  | 1.67   |
| ENSG00000167767 | KRT80         | 0.39  | 1.06  | 0.75  | 2.72  | 1.92   |
| ENSG00000173451 | THAP2         | 0.88  | 1.45  | 1.31  | 1.65  | 1.49   |
| ENSG00000178498 | DTX3          | 1.39  | 2.81  | 3.45  | 2.02  | 2.48   |
| ENSG00000185482 | STAC3         | 0.73  | 1.93  | 1.68  | 2.64  | 2.30   |
| ENSG00000185633 | NDUFA4L2      | 1.34  | 5.54  | 19.00 | 4.13  | 14.18  |
| ENSG00000188026 | RILPL1        | 1.71  | 3.30  | 3.75  | 1.93  | 2.19   |
| ENSG00000198040 | ZNF84         | 9.61  | 17.29 | 17.84 | 1.80  | 1.86   |
| ENSG00000214029 | ZNF891        | 2.97  | 4.82  | 5.25  | 1.62  | 1.77   |
| ENSG00000240771 | ARHGEF25      | 1.47  | 3.09  | 3.98  | 2.10  | 2.71   |
| ENSG00000120658 | ENOX1         | 6.81  | 11.15 | 13.31 | 1.64  | 1.95   |
| ENSG00000127863 | TNFRSF19      | 11.66 | 21.14 | 18.80 | 1.81  | 1.61   |
| ENSG00000152767 | FARP1         | 0.86  | 1.33  | 1.39  | 1.55  | 1.62   |
| ENSG00000036530 | CYP46A1       | 1.36  | 2.10  | 2.29  | 1.54  | 1.68   |
| ENSG00000185215 | TNFAIP2       | 0.38  | 0.92  | 1.26  | 2.42  | 3.32   |
| ENSG00000196405 | EVL           | 3.95  | 6.00  | 7.27  | 1.52  | 1.84   |
| ENSG00000197119 | SLC25A29      | 7.00  | 12.57 | 15.97 | 1.80  | 2.28   |
| ENSG00000197406 | DIO3          | 0.03  | 1.64  | 3.72  | 54.67 | 124.00 |

|                 |           |       |        |        |       |       |
|-----------------|-----------|-------|--------|--------|-------|-------|
| ENSG00000227051 | C14orf132 | 1.34  | 1.71   | 2.10   | 1.28  | 1.57  |
| ENSG00000258818 | RNASE4    | 2.41  | 4.11   | 4.58   | 1.71  | 1.90  |
| ENSG00000140398 | NEIL1     | 3.08  | 6.07   | 8.25   | 1.97  | 2.68  |
| ENSG00000156218 | ADAMTSL3  | 6.68  | 10.09  | 9.59   | 1.51  | 1.44  |
| ENSG00000166762 | CATSPER2  | 1.68  | 3.14   | 3.28   | 1.87  | 1.95  |
| ENSG00000166839 | ANKDD1A   | 1.87  | 3.75   | 3.30   | 2.01  | 1.76  |
| ENSG00000172379 | ARNT2     | 1.77  | 2.68   | 2.92   | 1.51  | 1.65  |
| ENSG00000175265 | GOLGA8A   | 11.33 | 33.56  | 37.37  | 2.96  | 3.30  |
| ENSG00000215252 | GOLGA8B   | 5.05  | 16.46  | 16.68  | 3.26  | 3.30  |
| ENSG00000006327 | TNFRSF12A | 4.31  | 9.01   | 8.84   | 2.09  | 2.05  |
| ENSG00000102878 | HSF4      | 3.80  | 5.35   | 8.05   | 1.41  | 2.12  |
| ENSG00000167968 | DNASE1L2  | 1.83  | 2.32   | 3.09   | 1.27  | 1.69  |
| ENSG00000178773 | CPNE7     | 11.93 | 15.04  | 19.92  | 1.26  | 1.67  |
| ENSG00000183971 | NPW       | 0.93  | 1.53   | 2.22   | 1.65  | 2.39  |
| ENSG00000196123 | KIAA0895L | 10.04 | 12.22  | 15.96  | 1.22  | 1.59  |
| ENSG00000196155 | PLEKHG4   | 1.77  | 2.48   | 3.53   | 1.40  | 1.99  |
| ENSG00000242173 | ARHGDIG   | 3.42  | 4.95   | 7.05   | 1.45  | 2.06  |
| ENSG00000257108 | NHLRC4    | 0.92  | 1.08   | 1.86   | 1.17  | 2.02  |
| ENSG00000017373 | SRCIN1    | 0.69  | 1.48   | 1.91   | 2.14  | 2.77  |
| ENSG00000035862 | TIMP2     | 3.67  | 4.59   | 6.61   | 1.25  | 1.80  |
| ENSG00000176749 | CDK5R1    | 5.16  | 6.85   | 8.38   | 1.33  | 1.62  |
| ENSG00000176845 | METRNL    | 0.52  | 0.87   | 1.10   | 1.67  | 2.12  |
| ENSG00000183979 | NPB       | 0.08  | 1.17   | 0.03   | 14.63 | 0.38  |
| ENSG00000186868 | MAPT      | 0.75  | 1.27   | 1.74   | 1.69  | 2.32  |
| ENSG00000198720 | ANKRD13B  | 4.53  | 7.37   | 8.79   | 1.63  | 1.94  |
| ENSG00000132872 | SYT4      | 1.19  | 3.51   | 17.64  | 2.95  | 14.82 |
| ENSG00000141665 | FBXO15    | 2.31  | 3.62   | 3.93   | 1.57  | 1.70  |
| ENSG00000152217 | SETBP1    | 3.57  | 5.99   | 6.34   | 1.68  | 1.78  |
| ENSG00000063180 | CA11      | 2.68  | 4.60   | 5.47   | 1.72  | 2.04  |
| ENSG00000087074 | PPP1R15A  | 1.45  | 2.99   | 2.68   | 2.06  | 1.85  |
| ENSG00000087076 | HSD17B14  | 0.44  | 2.44   | 3.46   | 5.55  | 7.86  |
| ENSG00000104808 | DHDH      | 0.85  | 0.87   | 1.54   | 1.02  | 1.81  |
| ENSG00000105088 | OLFM2     | 0.32  | 1.17   | 2.03   | 3.66  | 6.34  |
| ENSG00000105270 | CLIP3     | 0.53  | 1.39   | 1.51   | 2.62  | 2.85  |
| ENSG00000105290 | APLP1     | 6.10  | 6.74   | 10.16  | 1.10  | 1.67  |
| ENSG00000105696 | TMEM59L   | 0.80  | 2.38   | 4.22   | 2.98  | 5.28  |
| ENSG00000116014 | KISS1R    | 0.19  | 0.27   | 1.17   | 1.42  | 6.16  |
| ENSG00000130513 | GDF15     | 44.87 | 311.01 | 365.37 | 6.93  | 8.14  |
| ENSG00000130517 | PGPEP1    | 5.11  | 11.47  | 12.48  | 2.24  | 2.44  |

|                 |             |       |       |        |            |          |
|-----------------|-------------|-------|-------|--------|------------|----------|
| ENSG00000130518 | KIAA1683    | 0.48  | 1.26  | 1.54   | 2.63       | 3.21     |
| ENSG00000130813 | C19orf66    | 1.19  | 2.27  | 2.80   | 1.91       | 2.35     |
| ENSG00000131398 | KCNC3       | 1.29  | 2.91  | 3.61   | 2.26       | 2.80     |
| ENSG00000132003 | ZSWIM4      | 0.90  | 1.42  | 1.62   | 1.58       | 1.80     |
| ENSG00000167766 | ZNF83       | 8.55  | 12.75 | 14.88  | 1.49       | 1.74     |
| ENSG00000170949 | ZNF160      | 2.98  | 4.26  | 4.70   | 1.43       | 1.58     |
| ENSG00000174788 | PCP2        | 0.21  | 1.17  | 1.41   | 5.57       | 6.71     |
| ENSG00000176490 | DIRAS1      | 4.98  | 7.00  | 8.06   | 1.41       | 1.62     |
| ENSG00000183248 | FLJ22184    | 4.56  | 5.52  | 7.20   | 1.21       | 1.58     |
| ENSG00000186567 | CEACAM19    | 1.04  | 2.07  | 2.03   | 1.99       | 1.95     |
| ENSG00000198046 | ZNF667      | 3.23  | 4.49  | 5.07   | 1.39       | 1.57     |
| ENSG00000223802 | CERS1       | 1.59  | 1.98  | 2.64   | 1.25       | 1.66     |
| ENSG00000267740 | AC024592.12 | 0.00  | 7.41  | 0.07   | 7410000.00 | 70000.00 |
| ENSG00000003436 | TFPI        | 21.25 | 37.71 | 34.52  | 1.77       | 1.62     |
| ENSG00000115325 | DOK1        | 0.68  | 0.92  | 1.19   | 1.35       | 1.75     |
| ENSG00000115548 | KDM3A       | 1.96  | 3.61  | 4.14   | 1.84       | 2.11     |
| ENSG00000125629 | INSIG2      | 5.67  | 8.94  | 8.84   | 1.58       | 1.56     |
| ENSG00000135976 | ANKRD36     | 1.24  | 1.49  | 2.06   | 1.20       | 1.66     |
| ENSG00000144199 | FAHD2B      | 0.60  | 1.35  | 1.78   | 2.25       | 2.97     |
| ENSG00000144339 | TMEFF2      | 36.93 | 46.20 | 57.05  | 1.25       | 1.54     |
| ENSG00000144485 | HES6        | 23.53 | 59.16 | 59.18  | 2.51       | 2.52     |
| ENSG00000152256 | PDK1        | 8.32  | 10.33 | 12.52  | 1.24       | 1.50     |
| ENSG00000163328 | GPR155      | 1.92  | 3.21  | 3.10   | 1.67       | 1.61     |
| ENSG00000163497 | FEV         | 3.03  | 5.16  | 7.00   | 1.70       | 2.31     |
| ENSG00000163516 | ANKZF1      | 7.12  | 8.42  | 12.16  | 1.18       | 1.71     |
| ENSG00000168280 | KIF5C       | 3.39  | 6.58  | 6.70   | 1.94       | 1.98     |
| ENSG00000169047 | IRS1        | 1.34  | 3.05  | 2.96   | 2.28       | 2.21     |
| ENSG00000183281 | PLGLB1      | 1.07  | 2.21  | 1.98   | 2.07       | 1.85     |
| ENSG00000118707 | TGIF2       | 5.82  | 8.78  | 9.40   | 1.51       | 1.62     |
| ENSG00000130684 | ZNF337      | 5.41  | 12.20 | 13.23  | 2.26       | 2.45     |
| ENSG00000132793 | LPIN3       | 3.19  | 3.95  | 5.17   | 1.24       | 1.62     |
| ENSG00000132821 | VSTM2L      | 0.10  | 0.70  | 2.35   | 7.00       | 23.50    |
| ENSG00000184402 | SS18L1      | 15.21 | 23.96 | 24.29  | 1.58       | 1.60     |
| ENSG00000215440 | NPEPL1      | 1.32  | 1.99  | 2.44   | 1.51       | 1.85     |
| ENSG00000160180 | TFF3        | 0.67  | 2.43  | 4.33   | 3.63       | 6.46     |
| ENSG00000184012 | TMPRSS2     | 57.44 | 56.14 | 112.41 | 0.98       | 1.96     |
| ENSG00000100027 | YPEL1       | 1.30  | 2.03  | 2.76   | 1.56       | 2.12     |
| ENSG00000100292 | HMOX1       | 4.87  | 20.46 | 21.32  | 4.20       | 4.38     |
| ENSG00000128342 | LIF         | 1.38  | 3.84  | 3.72   | 2.78       | 2.70     |

|                 |              |       |       |        |       |      |
|-----------------|--------------|-------|-------|--------|-------|------|
| ENSG00000133466 | C1QTNF6      | 1.17  | 2.84  | 3.11   | 2.43  | 2.66 |
| ENSG00000159496 | RGL4         | 0.89  | 1.15  | 1.43   | 1.29  | 1.61 |
| ENSG00000166897 | ELFN2        | 0.26  | 0.80  | 1.00   | 3.08  | 3.85 |
| ENSG00000185022 | MAFF         | 0.61  | 0.86  | 1.14   | 1.41  | 1.87 |
| ENSG00000188130 | MAPK12       | 5.94  | 6.90  | 10.73  | 1.16  | 1.81 |
| ENSG00000197182 | FLJ27365     | 3.05  | 4.11  | 4.95   | 1.35  | 1.62 |
| ENSG00000251322 | SHANK3       | 2.06  | 2.79  | 3.60   | 1.35  | 1.75 |
| ENSG00000114796 | KLHL24       | 3.10  | 5.49  | 6.04   | 1.77  | 1.95 |
| ENSG00000145020 | AMT          | 0.69  | 1.93  | 2.90   | 2.80  | 4.20 |
| ENSG00000152952 | PLOD2        | 0.20  | 0.28  | 1.55   | 1.40  | 7.75 |
| ENSG00000156976 | EIF4A2       | 63.94 | 92.81 | 105.20 | 1.45  | 1.65 |
| ENSG00000163536 | SERPINI1     | 1.08  | 1.18  | 2.04   | 1.09  | 1.89 |
| ENSG00000168026 | TTC21A       | 0.51  | 1.06  | 1.08   | 2.08  | 2.12 |
| ENSG00000170017 | ALCAM        | 14.99 | 31.93 | 29.00  | 2.13  | 1.93 |
| ENSG00000173531 | MST1         | 1.83  | 4.98  | 8.23   | 2.72  | 4.50 |
| ENSG00000176945 | MUC20        | 0.96  | 1.72  | 1.51   | 1.79  | 1.57 |
| ENSG00000177565 | TBL1XR1      | 39.62 | 60.96 | 62.42  | 1.54  | 1.58 |
| ENSG00000214021 | TTLL3        | 2.40  | 4.38  | 4.69   | 1.83  | 1.95 |
| ENSG00000228804 | RP11-211G3.3 | 0.07  | 1.72  | 0.12   | 24.57 | 1.71 |
| ENSG00000250151 | ARPC4-TTLL3  | 3.59  | 6.74  | 9.65   | 1.88  | 2.69 |
| ENSG00000072832 | CRMP1        | 1.22  | 2.39  | 2.63   | 1.96  | 2.16 |
| ENSG00000072840 | EVC          | 4.09  | 5.84  | 7.05   | 1.43  | 1.72 |
| ENSG00000109458 | GAB1         | 1.17  | 2.26  | 1.99   | 1.93  | 1.70 |
| ENSG00000109771 | LRP2BP       | 0.80  | 1.09  | 1.22   | 1.36  | 1.53 |
| ENSG00000138696 | BMPR1B       | 3.96  | 4.76  | 7.32   | 1.20  | 1.85 |
| ENSG00000145284 | SCD5         | 5.05  | 9.42  | 11.74  | 1.87  | 2.32 |
| ENSG00000168824 | NSG1         | 0.54  | 1.00  | 0.97   | 1.85  | 1.80 |
| ENSG00000205129 | C4orf47      | 0.57  | 0.45  | 1.31   | 0.79  | 2.30 |
| ENSG00000039139 | DNAH5        | 1.21  | 2.49  | 2.77   | 2.06  | 2.29 |
| ENSG00000113083 | LOX          | 2.24  | 4.65  | 5.52   | 2.08  | 2.46 |
| ENSG00000113108 | APBB3        | 4.00  | 5.72  | 8.03   | 1.43  | 2.01 |
| ENSG00000113240 | CLK4         | 3.26  | 6.82  | 6.01   | 2.09  | 1.84 |
| ENSG00000145632 | PLK2         | 5.71  | 8.76  | 8.76   | 1.53  | 1.53 |
| ENSG00000164406 | LEAP2        | 2.00  | 3.20  | 2.38   | 1.60  | 1.19 |
| ENSG00000249437 | NAIP         | 1.78  | 2.57  | 3.27   | 1.44  | 1.84 |
| ENSG00000025039 | RRAGD        | 3.57  | 4.43  | 5.67   | 1.24  | 1.59 |
| ENSG00000112715 | VEGFA        | 5.93  | 22.96 | 25.38  | 3.87  | 4.28 |
| ENSG00000131016 | AKAP12       | 2.16  | 1.40  | 3.28   | 0.65  | 1.52 |
| ENSG00000132424 | PNISR        | 8.54  | 12.95 | 12.82  | 1.52  | 1.50 |

|                 |              |       |       |       |      |      |
|-----------------|--------------|-------|-------|-------|------|------|
| ENSG00000153291 | SLC25A27     | 3.74  | 10.44 | 11.77 | 2.79 | 3.15 |
| ENSG00000173626 | BET3L        | 2.09  | 2.94  | 3.37  | 1.41 | 1.61 |
| ENSG00000184465 | WDR27        | 1.68  | 2.29  | 2.76  | 1.36 | 1.64 |
| ENSG00000187987 | ZSCAN23      | 2.38  | 3.14  | 3.87  | 1.32 | 1.63 |
| ENSG00000204420 | C6orf25      | 0.64  | 1.50  | 1.81  | 2.34 | 2.83 |
| ENSG00000204618 | RNF39        | 0.40  | 0.87  | 1.10  | 2.18 | 2.75 |
| ENSG00000204681 | GABBR1       | 1.35  | 4.53  | 4.90  | 3.36 | 3.63 |
| ENSG00000213780 | GTF2H4       | 0.79  | 3.09  | 0.84  | 3.91 | 1.06 |
| ENSG00000055118 | KCNH2        | 0.88  | 1.28  | 1.83  | 1.45 | 2.08 |
| ENSG00000058404 | CAMK2B       | 3.07  | 3.37  | 5.48  | 1.10 | 1.79 |
| ENSG00000075618 | FSCN1        | 1.39  | 1.98  | 2.09  | 1.42 | 1.50 |
| ENSG00000105792 | C7orf63      | 2.66  | 4.41  | 6.19  | 1.66 | 2.33 |
| ENSG00000106004 | HOXA5        | 1.74  | 2.35  | 3.22  | 1.35 | 1.85 |
| ENSG00000106333 | PCOLCE       | 0.45  | 0.76  | 1.16  | 1.69 | 2.58 |
| ENSG00000136235 | GPNMB        | 1.68  | 4.27  | 5.05  | 2.54 | 3.01 |
| ENSG00000157224 | CLDN12       | 20.48 | 35.89 | 40.57 | 1.75 | 1.98 |
| ENSG00000164867 | NOS3         | 0.80  | 2.99  | 4.99  | 3.74 | 6.24 |
| ENSG00000188732 | FAM221A      | 3.95  | 5.41  | 6.66  | 1.37 | 1.69 |
| ENSG00000213420 | GPC2         | 1.63  | 2.69  | 3.12  | 1.65 | 1.91 |
| ENSG00000214128 | TMEM213      | 0.93  | 1.43  | 1.48  | 1.54 | 1.59 |
| ENSG00000091879 | ANGPT2       | 0.86  | 3.20  | 4.67  | 3.72 | 5.43 |
| ENSG00000104419 | NDRG1        | 9.41  | 6.31  | 15.46 | 0.67 | 1.64 |
| ENSG00000104765 | BNIP3L       | 23.66 | 33.71 | 43.07 | 1.42 | 1.82 |
| ENSG00000120875 | DUSP4        | 8.90  | 16.00 | 18.55 | 1.80 | 2.08 |
| ENSG00000167701 | GPT          | 1.47  | 2.32  | 3.75  | 1.58 | 2.55 |
| ENSG00000169499 | PLEKHA2      | 1.02  | 1.83  | 2.19  | 1.79 | 2.15 |
| ENSG00000185189 | NRBP2        | 1.21  | 1.45  | 2.42  | 1.20 | 2.00 |
| ENSG00000241852 | C8orf58      | 0.57  | 1.04  | 0.86  | 1.82 | 1.51 |
| ENSG00000248801 | RP11-664D7.4 | 1.42  | 1.61  | 2.28  | 1.13 | 1.61 |
| ENSG00000080298 | RFX3         | 1.14  | 2.03  | 1.93  | 1.78 | 1.69 |
| ENSG00000099139 | PCSK5        | 2.63  | 3.11  | 4.46  | 1.18 | 1.70 |
| ENSG00000106688 | SLC1A1       | 2.12  | 2.92  | 4.02  | 1.38 | 1.90 |
| ENSG00000106976 | DNM1         | 0.58  | 1.35  | 1.64  | 2.33 | 2.83 |
| ENSG00000107331 | ABCA2        | 9.28  | 8.63  | 14.82 | 0.93 | 1.60 |
| ENSG00000120217 | CD274        | 1.70  | 3.95  | 7.26  | 2.32 | 4.27 |
| ENSG00000136826 | KLF4         | 2.39  | 3.97  | 4.03  | 1.66 | 1.69 |
| ENSG00000136895 | GARNL3       | 0.80  | 1.42  | 1.55  | 1.78 | 1.94 |
| ENSG00000148180 | GSN          | 0.54  | 0.99  | 1.20  | 1.83 | 2.22 |
| ENSG00000160360 | GPSM1        | 7.10  | 9.84  | 10.99 | 1.39 | 1.55 |

|                 |          |      |       |       |      |      |
|-----------------|----------|------|-------|-------|------|------|
| ENSG00000173258 | ZNF483   | 1.72 | 2.47  | 2.95  | 1.44 | 1.72 |
| ENSG00000230185 | C9orf147 | 1.20 | 1.88  | 1.75  | 1.57 | 1.46 |
| ENSG00000009694 | TENM1    | 5.01 | 8.82  | 11.34 | 1.76 | 2.26 |
| ENSG00000046651 | OFD1     | 2.48 | 4.30  | 4.45  | 1.73 | 1.79 |
| ENSG00000067840 | PDZD4    | 0.74 | 0.94  | 1.58  | 1.27 | 2.14 |
| ENSG00000102007 | PLP2     | 1.72 | 2.34  | 3.26  | 1.36 | 1.90 |
| ENSG00000129682 | FGF13    | 0.82 | 3.15  | 2.73  | 3.84 | 3.33 |
| ENSG00000165288 | BRWD3    | 1.60 | 2.40  | 2.37  | 1.50 | 1.48 |
| ENSG00000169891 | REPS2    | 4.27 | 11.17 | 15.16 | 2.62 | 3.55 |
| ENSG00000205542 | TMSB4X   | 0.80 | 3.43  | 3.31  | 4.29 | 4.14 |
| ENSG00000242732 | RGAG4    | 1.61 | 2.90  | 2.83  | 1.80 | 1.76 |

**Supplementary Table S3: Hypoxia down M**

| LNCaP           |             |         |         |             |
|-----------------|-------------|---------|---------|-------------|
| Gene ID         | Gene Symbol | 10% FBS | Hypoxia | Fold change |
| ENSG00000090861 | AARS        | 113.63  | 56.69   | 0.50        |
| ENSG00000197150 | ABCB8       | 10.50   | 6.13    | 0.58        |
| ENSG00000101986 | ABCD1       | 45.00   | 27.34   | 0.61        |
| ENSG00000114779 | ABHD14B     | 54.72   | 26.37   | 0.48        |
| ENSG00000100439 | ABHD4       | 43.49   | 23.68   | 0.54        |
| ENSG00000114626 | ABTB1       | 1.78    | 1.16    | 0.65        |
| ENSG00000115170 | ACVR1       | 2.83    | 1.79    | 0.63        |
| ENSG00000170634 | ACYP2       | 4.41    | 2.57    | 0.58        |
| ENSG00000063761 | ADCK1       | 8.03    | 4.96    | 0.62        |
| ENSG00000205336 | GPR56       | 21.87   | 12.23   | 0.56        |
| ENSG00000128165 | ADM2        | 70.77   | 19.49   | 0.28        |
| ENSG00000153531 | ADPRHL1     | 18.71   | 10.72   | 0.57        |
| ENSG00000130706 | ADRM1       | 92.59   | 59.20   | 0.64        |
| ENSG00000038002 | AGA         | 10.04   | 6.23    | 0.62        |
| ENSG00000106546 | AHR         | 2.33    | 1.24    | 0.53        |
| ENSG00000146416 | AIG1        | 21.82   | 13.43   | 0.62        |
| ENSG00000112297 | AIM1        | 5.03    | 2.70    | 0.54        |
| ENSG00000106305 | AIMP2       | 75.78   | 41.92   | 0.55        |
| ENSG00000129474 | AJUBA       | 16.41   | 10.26   | 0.63        |
| ENSG00000179841 | AKAP5       | 4.13    | 2.10    | 0.51        |
| ENSG00000106948 | AKNA        | 2.72    | 1.74    | 0.64        |
| ENSG00000072210 | ALDH3A2     | 60.18   | 34.10   | 0.57        |
| ENSG00000119523 | ALG2        | 35.60   | 22.68   | 0.64        |
| ENSG00000137760 | ALKBH8      | 2.39    | 1.14    | 0.48        |
| ENSG00000073331 | ALPK1       | 3.09    | 1.96    | 0.64        |
| ENSG00000167522 | ANKRD11     | 23.53   | 14.50   | 0.62        |
| ENSG00000089847 | ANKRD24     | 2.39    | 1.21    | 0.51        |
| ENSG00000154065 | ANKRD29     | 1.74    | 0.92    | 0.53        |
| ENSG00000137494 | ANKRD42     | 4.29    | 2.79    | 0.65        |
| ENSG00000138279 | ANXA7       | 31.17   | 20.32   | 0.65        |
| ENSG00000042753 | AP2S1       | 63.31   | 38.56   | 0.61        |
| ENSG00000163697 | APBB2       | 3.37    | 1.72    | 0.51        |
| ENSG00000184831 | APOO        | 7.79    | 4.97    | 0.64        |
| ENSG00000143761 | ARF1        | 390.94  | 236.06  | 0.60        |
| ENSG00000168374 | ARF4        | 122.07  | 71.21   | 0.58        |
| ENSG00000081181 | ARG2        | 115.50  | 64.87   | 0.56        |



|                 |           |        |        |      |
|-----------------|-----------|--------|--------|------|
| ENSG00000145819 | ARHGAP26  | 4.63   | 2.69   | 0.58 |
| ENSG00000116584 | ARHGEF2   | 11.81  | 5.60   | 0.47 |
| ENSG00000125962 | ARMCX5    | 10.33  | 6.52   | 0.63 |
| ENSG00000133794 | ARNTL     | 3.46   | 2.19   | 0.63 |
| ENSG00000130429 | ARPC1B    | 31.16  | 11.65  | 0.37 |
| ENSG00000136950 | ARPC5L    | 63.73  | 35.52  | 0.56 |
| ENSG00000140450 | ARRDC4    | 14.20  | 3.27   | 0.23 |
| ENSG00000204147 | ASAH2B    | 8.15   | 5.34   | 0.66 |
| ENSG00000088280 | ASAP3     | 3.97   | 2.01   | 0.51 |
| ENSG00000198356 | ASNA1     | 103.43 | 66.67  | 0.64 |
| ENSG00000070669 | ASNS      | 52.30  | 15.02  | 0.29 |
| ENSG00000148219 | ASTN2     | 2.13   | 1.16   | 0.54 |
| ENSG00000162772 | ATF3      | 46.61  | 26.99  | 0.58 |
| ENSG00000128272 | ATF4      | 513.68 | 268.56 | 0.52 |
| ENSG00000169136 | ATF5      | 48.73  | 19.46  | 0.40 |
| ENSG00000118217 | ATF6      | 23.53  | 12.82  | 0.55 |
| ENSG00000175224 | ATG13     | 25.03  | 15.92  | 0.64 |
| ENSG00000130734 | ATG4D     | 22.88  | 14.41  | 0.63 |
| ENSG00000070961 | ATP2B1    | 16.87  | 8.44   | 0.50 |
| ENSG00000064270 | ATP2C2    | 16.81  | 7.77   | 0.46 |
| ENSG00000124788 | ATXN1     | 5.92   | 1.68   | 0.28 |
| ENSG00000086062 | B4GALT1   | 91.60  | 47.64  | 0.52 |
| ENSG00000127152 | BCL11B    | 1.13   | 0.14   | 0.13 |
| ENSG00000105829 | BET1      | 8.24   | 5.10   | 0.62 |
| ENSG00000177951 | BET1L     | 41.25  | 22.98  | 0.56 |
| ENSG00000133134 | BEX2      | 106.82 | 41.44  | 0.39 |
| ENSG00000090013 | BLVRB     | 79.39  | 41.86  | 0.53 |
| ENSG00000113734 | BNIP1     | 23.45  | 13.52  | 0.58 |
| ENSG00000165714 | LOH12CR1  | 8.89   | 5.52   | 0.62 |
| ENSG00000106245 | BUD31     | 64.50  | 36.08  | 0.56 |
| ENSG00000112276 | BVES      | 2.00   | 1.22   | 0.61 |
| ENSG00000168070 | C11orf85  | 1.16   | 0.75   | 0.64 |
| ENSG00000189227 | C15orf61  | 17.35  | 9.63   | 0.56 |
| ENSG00000166246 | C16orf71  | 1.71   | 0.87   | 0.51 |
| ENSG00000174109 | C16orf91  | 39.86  | 26.06  | 0.65 |
| ENSG00000205710 | C17orf107 | 5.84   | 2.15   | 0.37 |
| ENSG00000224877 | C17orf89  | 105.80 | 68.80  | 0.65 |
| ENSG00000187624 | C17orf97  | 3.00   | 1.96   | 0.65 |
| ENSG00000197982 | C1orf122  | 62.32  | 34.84  | 0.56 |

|                 |           |        |        |      |
|-----------------|-----------|--------|--------|------|
| ENSG00000203724 | C1orf53   | 17.43  | 7.51   | 0.43 |
| ENSG00000171984 | C20orf196 | 5.80   | 3.71   | 0.64 |
| ENSG00000159079 | C21orf59  | 10.76  | 7.10   | 0.66 |
| ENSG00000128346 | C22orf23  | 6.26   | 2.92   | 0.47 |
| ENSG00000237651 | C2orf74   | 3.12   | 1.91   | 0.61 |
| ENSG00000151881 | C5orf28   | 15.97  | 6.41   | 0.40 |
| ENSG00000164241 | C5orf63   | 4.40   | 2.89   | 0.66 |
| ENSG00000204387 | C6orf48   | 236.13 | 150.77 | 0.64 |
| ENSG00000137434 | C6orf52   | 1.66   | 0.74   | 0.45 |
| ENSG00000104205 | SGK3      | 6.01   | 3.48   | 0.58 |
| ENSG00000238227 | C9orf69   | 45.95  | 29.76  | 0.65 |
| ENSG00000165698 | C9orf9    | 10.05  | 6.31   | 0.63 |
| ENSG00000136436 | CALCOCO2  | 25.44  | 16.36  | 0.64 |
| ENSG00000112186 | CAP2      | 22.79  | 9.79   | 0.43 |
| ENSG00000149260 | CAPN5     | 22.61  | 5.52   | 0.24 |
| ENSG00000187796 | CARD9     | 4.92   | 3.19   | 0.65 |
| ENSG00000110619 | CARS      | 6.95   | 4.01   | 0.58 |
| ENSG00000147044 | CASK      | 5.35   | 3.19   | 0.60 |
| ENSG00000196954 | CASP4     | 3.72   | 2.05   | 0.55 |
| ENSG00000121691 | CAT       | 79.85  | 46.45  | 0.58 |
| ENSG00000139899 | CBLN3     | 3.19   | 2.03   | 0.63 |
| ENSG00000141582 | CBX4      | 124.51 | 66.78  | 0.54 |
| ENSG00000048342 | CC2D2A    | 4.45   | 2.77   | 0.62 |
| ENSG00000103021 | CCDC113   | 16.77  | 9.54   | 0.57 |
| ENSG00000166946 | CCNDBP1   | 15.68  | 10.20  | 0.65 |
| ENSG00000163249 | CCNYL1    | 6.01   | 3.85   | 0.64 |
| ENSG00000196352 | CD55      | 8.76   | 1.82   | 0.21 |
| ENSG00000176386 | CDC26     | 1.90   | 1.17   | 0.61 |
| ENSG00000128283 | CDC42EP1  | 12.03  | 7.89   | 0.66 |
| ENSG00000147883 | CDKN2B    | 1.58   | 1.02   | 0.65 |
| ENSG00000153879 | CEBPG     | 59.63  | 28.36  | 0.48 |
| ENSG00000093072 | CECR1     | 1.19   | 0.64   | 0.54 |
| ENSG00000160401 | C9orf117  | 5.09   | 2.90   | 0.57 |
| ENSG00000128965 | CHAC1     | 77.56  | 7.07   | 0.09 |
| ENSG00000250479 | CHCHD10   | 77.47  | 48.89  | 0.63 |
| ENSG00000163528 | CHCHD4    | 30.98  | 18.48  | 0.60 |
| ENSG00000123989 | CHPF      | 49.12  | 25.56  | 0.52 |
| ENSG00000109572 | CLCN3     | 55.35  | 34.85  | 0.63 |
| ENSG00000073464 | CLCN4     | 5.44   | 1.97   | 0.36 |

|                 |         |        |        |      |
|-----------------|---------|--------|--------|------|
| ENSG00000106404 | CLDN15  | 6.87   | 3.81   | 0.55 |
| ENSG00000181885 | CLDN7   | 196.09 | 124.98 | 0.64 |
| ENSG00000153132 | CLGN    | 27.28  | 10.21  | 0.37 |
| ENSG00000169504 | CLIC4   | 66.96  | 32.65  | 0.49 |
| ENSG00000175416 | CLTB    | 22.99  | 14.03  | 0.61 |
| ENSG00000125246 | CLYBL   | 1.27   | 0.64   | 0.50 |
| ENSG00000091317 | CMTM6   | 44.41  | 28.95  | 0.65 |
| ENSG00000205423 | CNEP1R1 | 4.17   | 2.63   | 0.63 |
| ENSG00000100528 | CNIH    | 74.15  | 44.03  | 0.59 |
| ENSG00000136152 | COG3    | 28.39  | 18.07  | 0.64 |
| ENSG00000084636 | COL16A1 | 1.06   | 0.57   | 0.53 |
| ENSG00000163359 | COL6A3  | 23.38  | 11.14  | 0.48 |
| ENSG00000173163 | COMMD1  | 11.61  | 6.56   | 0.57 |
| ENSG00000110442 | COMMD9  | 11.92  | 7.28   | 0.61 |
| ENSG00000165644 | COMTD1  | 13.17  | 7.44   | 0.56 |
| ENSG00000129083 | COPB1   | 20.38  | 9.91   | 0.49 |
| ENSG00000105669 | COPE    | 28.08  | 16.06  | 0.57 |
| ENSG00000181789 | COPG1   | 139.56 | 73.81  | 0.53 |
| ENSG00000203667 | COX20   | 15.76  | 9.69   | 0.61 |
| ENSG00000115944 | COX7A2L | 28.72  | 17.58  | 0.61 |
| ENSG00000137449 | CPEB2   | 2.49   | 1.08   | 0.43 |
| ENSG00000107864 | CPEB3   | 2.61   | 1.53   | 0.58 |
| ENSG00000110090 | CPT1A   | 39.04  | 24.20  | 0.62 |
| ENSG00000157184 | CPT2    | 45.29  | 29.85  | 0.66 |
| ENSG00000107175 | CREB3   | 50.53  | 28.15  | 0.56 |
| ENSG00000182158 | CREB3L2 | 15.45  | 10.10  | 0.65 |
| ENSG00000095794 | CREM    | 4.89   | 2.44   | 0.50 |
| ENSG00000150938 | CRIM1   | 4.58   | 2.55   | 0.56 |
| ENSG00000121552 | CSTA    | 2.67   | 0.63   | 0.24 |
| ENSG00000126890 | CTAG2   | 1.43   | 0.75   | 0.53 |
| ENSG00000150527 | CTAGE5  | 12.17  | 4.53   | 0.37 |
| ENSG00000117151 | CTBS    | 17.39  | 11.25  | 0.65 |
| ENSG00000175215 | CTDSP2  | 49.93  | 31.20  | 0.62 |
| ENSG00000116761 | CTH     | 34.66  | 8.30   | 0.24 |
| ENSG00000064601 | CTSA    | 9.58   | 6.28   | 0.66 |
| ENSG00000117984 | CTSD    | 104.73 | 69.10  | 0.66 |
| ENSG00000135047 | CTSL1   | 59.57  | 34.67  | 0.58 |
| ENSG00000140465 | CYP1A1  | 1.86   | 0.92   | 0.49 |
| ENSG00000120306 | CYSTM1  | 37.48  | 20.01  | 0.53 |

|                 |               |        |        |      |
|-----------------|---------------|--------|--------|------|
| ENSG00000189186 | DCAF8L2       | 1.30   | 0.85   | 0.66 |
| ENSG00000204843 | DCTN1         | 8.94   | 5.44   | 0.61 |
| ENSG00000132437 | DDC           | 10.63  | 3.63   | 0.34 |
| ENSG00000175197 | DDIT3         | 114.66 | 39.34  | 0.34 |
| ENSG00000168209 | DDIT4         | 472.74 | 278.31 | 0.59 |
| ENSG00000105671 | DDX49         | 43.90  | 25.58  | 0.58 |
| ENSG00000155792 | DEPTOR        | 10.44  | 4.13   | 0.40 |
| ENSG00000116133 | DHCR24        | 211.42 | 132.49 | 0.63 |
| ENSG00000100867 | DHRS2         | 1.90   | 0.77   | 0.40 |
| ENSG00000187630 | DHRS4L2       | 9.64   | 6.14   | 0.64 |
| ENSG00000086189 | DIMT1         | 8.83   | 5.56   | 0.63 |
| ENSG00000268471 | DKFZP434I0714 | 14.69  | 8.76   | 0.60 |
| ENSG00000103423 | DNAJA3        | 43.14  | 25.29  | 0.59 |
| ENSG00000128590 | DNAJB9        | 31.75  | 17.26  | 0.54 |
| ENSG00000136770 | DNAJC1        | 10.98  | 7.17   | 0.65 |
| ENSG00000077232 | DNAJC10       | 13.44  | 7.94   | 0.59 |
| ENSG00000120675 | DNAJC15       | 4.70   | 2.80   | 0.60 |
| ENSG00000105612 | DNASE2        | 44.71  | 25.40  | 0.57 |
| ENSG00000137976 | DNASE2B       | 8.92   | 5.83   | 0.65 |
| ENSG00000213221 | DNLZ          | 3.64   | 2.15   | 0.59 |
| ENSG00000129932 | DOHH          | 14.31  | 9.06   | 0.63 |
| ENSG00000173852 | DPY19L1       | 1.40   | 0.71   | 0.51 |
| ENSG00000125821 | DTD1          | 61.84  | 39.23  | 0.63 |
| ENSG00000198842 | DUSP27        | 11.25  | 1.18   | 0.10 |
| ENSG00000145088 | EAF2          | 1.50   | 0.55   | 0.37 |
| ENSG00000167969 | ECI1          | 27.09  | 17.73  | 0.65 |
| ENSG00000088298 | EDEM2         | 9.47   | 5.35   | 0.56 |
| ENSG00000114654 | CCDC48        | 7.18   | 3.59   | 0.50 |
| ENSG00000138798 | EGF           | 7.96   | 4.45   | 0.56 |
| ENSG00000113790 | EHHADH        | 2.31   | 1.45   | 0.63 |
| ENSG00000119718 | EIF2B2        | 29.08  | 17.65  | 0.61 |
| ENSG00000163412 | EIF4E3        | 1.60   | 1.04   | 0.65 |
| ENSG00000187840 | EIF4EBP1      | 328.85 | 154.09 | 0.47 |
| ENSG00000075151 | EIF4G3        | 8.05   | 4.89   | 0.61 |
| ENSG00000141642 | ELAC1         | 4.79   | 2.11   | 0.44 |
| ENSG00000111145 | ELK3          | 3.32   | 1.89   | 0.57 |
| ENSG00000138080 | EMILIN1       | 1.27   | 0.60   | 0.47 |
| ENSG00000165675 | ENOX2         | 4.53   | 2.95   | 0.65 |
| ENSG00000168032 | ENTPD3        | 6.13   | 2.08   | 0.34 |

|                 |          |        |       |      |
|-----------------|----------|--------|-------|------|
| ENSG00000187097 | ENTPD5   | 13.78  | 8.89  | 0.65 |
| ENSG00000115109 | EPB41L5  | 14.56  | 8.35  | 0.57 |
| ENSG00000086289 | EPDR1    | 2.26   | 0.98  | 0.43 |
| ENSG00000142627 | EPHA2    | 1.85   | 1.15  | 0.62 |
| ENSG00000044524 | EPHA3    | 5.48   | 3.24  | 0.59 |
| ENSG00000135333 | EPHA7    | 2.07   | 1.35  | 0.65 |
| ENSG00000143819 | EPHX1    | 217.72 | 94.02 | 0.43 |
| ENSG00000172031 | EPHX4    | 2.12   | 1.34  | 0.63 |
| ENSG00000136628 | EPRS     | 31.43  | 17.54 | 0.56 |
| ENSG00000068912 | ERLEC1   | 30.46  | 18.27 | 0.60 |
| ENSG00000164010 | ERMAP    | 8.81   | 5.78  | 0.66 |
| ENSG00000178607 | ERN1     | 23.37  | 9.04  | 0.39 |
| ENSG00000089248 | ERP29    | 131.70 | 74.48 | 0.57 |
| ENSG00000104413 | ESRP1    | 67.23  | 28.39 | 0.42 |
| ENSG00000139641 | ESYT1    | 68.26  | 44.56 | 0.65 |
| ENSG00000105672 | ETV2     | 1.76   | 0.58  | 0.33 |
| ENSG00000142459 | EVI5L    | 8.55   | 5.24  | 0.61 |
| ENSG00000138190 | EXOC6    | 5.21   | 3.34  | 0.64 |
| ENSG00000120699 | EXOSC8   | 22.33  | 14.33 | 0.64 |
| ENSG00000182197 | EXT1     | 1.83   | 1.01  | 0.55 |
| ENSG00000169122 | FAM110B  | 4.13   | 2.34  | 0.57 |
| ENSG00000135842 | FAM129A  | 22.19  | 6.93  | 0.31 |
| ENSG00000196227 | FAM217B  | 8.80   | 5.01  | 0.57 |
| ENSG00000203778 | C6orf225 | 5.69   | 3.30  | 0.58 |
| ENSG00000204805 | FAM27E4P | 11.47  | 7.12  | 0.62 |
| ENSG00000168672 | FAM84B   | 49.41  | 25.69 | 0.52 |
| ENSG00000107872 | FBXL15   | 13.88  | 8.23  | 0.59 |
| ENSG00000197361 | FBXL22   | 4.60   | 1.91  | 0.42 |
| ENSG00000037637 | FBXO42   | 11.47  | 6.87  | 0.60 |
| ENSG00000162746 | FCRLB    | 1.29   | 0.74  | 0.58 |
| ENSG00000161513 | FDXR     | 6.77   | 4.44  | 0.66 |
| ENSG00000105550 | FGF21    | 2.18   | 0.48  | 0.22 |
| ENSG00000198855 | FICD     | 9.55   | 4.94  | 0.52 |
| ENSG00000100442 | FKBP3    | 5.51   | 3.36  | 0.61 |
| ENSG00000119686 | FLVCR2   | 4.41   | 2.43  | 0.55 |
| ENSG00000139445 | FOXN4    | 1.18   | 0.63  | 0.54 |
| ENSG00000150907 | FOXO1    | 2.10   | 1.16  | 0.55 |
| ENSG00000070601 | FRMPD1   | 6.79   | 3.27  | 0.48 |
| ENSG00000150667 | FSIP1    | 1.65   | 0.88  | 0.53 |

|                 |            |        |       |      |
|-----------------|------------|--------|-------|------|
| ENSG00000226124 | AC073043.2 | 1.10   | 0.68  | 0.62 |
| ENSG00000140564 | FURIN      | 34.27  | 14.30 | 0.42 |
| ENSG00000174951 | FUT1       | 8.17   | 4.33  | 0.53 |
| ENSG00000171124 | FUT3       | 2.83   | 1.52  | 0.54 |
| ENSG00000165060 | FXN        | 12.40  | 8.13  | 0.66 |
| ENSG00000156958 | GALK2      | 10.95  | 7.15  | 0.65 |
| ENSG00000141441 | FAM59A     | 2.34   | 1.41  | 0.60 |
| ENSG00000106105 | GARS       | 202.98 | 61.74 | 0.30 |
| ENSG00000059691 | PET112     | 1.97   | 1.30  | 0.66 |
| ENSG00000107862 | GBF1       | 43.02  | 28.25 | 0.66 |
| ENSG00000104381 | GDAP1      | 6.97   | 3.60  | 0.52 |
| ENSG00000198380 | GFPT1      | 39.27  | 17.23 | 0.44 |
| ENSG00000168237 | GLYCTK     | 2.56   | 1.02  | 0.40 |
| ENSG00000144591 | GMPPA      | 12.46  | 6.49  | 0.52 |
| ENSG00000127955 | GNAI1      | 73.23  | 37.83 | 0.52 |
| ENSG00000156052 | GNAQ       | 2.12   | 1.39  | 0.66 |
| ENSG00000066455 | GOLGA5     | 35.55  | 23.10 | 0.65 |
| ENSG00000135052 | GOLM1      | 81.82  | 51.78 | 0.63 |
| ENSG00000120053 | GOT1       | 45.24  | 21.63 | 0.48 |
| ENSG00000152642 | GPD1L      | 13.17  | 8.31  | 0.63 |
| ENSG00000183671 | GPR1       | 2.63   | 0.31  | 0.12 |
| ENSG00000112218 | GPR63      | 3.70   | 2.03  | 0.55 |
| ENSG00000164294 | GPX8       | 8.67   | 3.50  | 0.40 |
| ENSG00000106070 | GRB10      | 32.11  | 16.67 | 0.52 |
| ENSG00000030582 | GRN        | 39.38  | 23.68 | 0.60 |
| ENSG00000164284 | GRPEL2     | 41.42  | 25.57 | 0.62 |
| ENSG00000100983 | GSS        | 35.04  | 22.34 | 0.64 |
| ENSG00000065621 | GSTO2      | 1.78   | 1.08  | 0.61 |
| ENSG00000172432 | GTPBP2     | 28.16  | 13.21 | 0.47 |
| ENSG00000246705 | H2AFJ      | 92.28  | 55.94 | 0.61 |
| ENSG00000131373 | HACL1      | 2.20   | 1.43  | 0.65 |
| ENSG00000143575 | HAX1       | 136.75 | 72.87 | 0.53 |
| ENSG00000163517 | HDAC11     | 10.26  | 6.55  | 0.64 |
| ENSG00000184508 | HDDC3      | 19.18  | 11.65 | 0.61 |
| ENSG00000138642 | HERC6      | 4.44   | 2.32  | 0.52 |
| ENSG00000051108 | HERPUD1    | 104.84 | 40.81 | 0.39 |
| ENSG00000113924 | HGD        | 1.52   | 1.00  | 0.66 |
| ENSG00000235173 | FAM203A    | 10.19  | 6.27  | 0.62 |
| ENSG00000137133 | HINT2      | 38.30  | 19.91 | 0.52 |

|                 |           |        |       |      |
|-----------------|-----------|--------|-------|------|
| ENSG00000180573 | HIST1H2AC | 106.58 | 54.79 | 0.51 |
| ENSG00000180596 | HIST1H2BC | 41.58  | 13.29 | 0.32 |
| ENSG00000124635 | HIST1H2BJ | 18.16  | 5.22  | 0.29 |
| ENSG00000233822 | HIST1H2BN | 10.91  | 5.60  | 0.51 |
| ENSG00000197409 | HIST1H3D  | 22.56  | 12.78 | 0.57 |
| ENSG00000197153 | HIST1H3J  | 3.23   | 1.31  | 0.41 |
| ENSG00000203814 | HIST2H2BF | 14.18  | 8.73  | 0.62 |
| ENSG00000159267 | HLCS      | 14.06  | 7.51  | 0.53 |
| ENSG00000101294 | HM13      | 63.12  | 41.18 | 0.65 |
| ENSG00000221887 | HMSD      | 1.21   | 0.35  | 0.29 |
| ENSG00000108511 | HOXB6     | 4.21   | 2.52  | 0.60 |
| ENSG00000170689 | HOXB9     | 9.83   | 4.08  | 0.41 |
| ENSG00000198353 | HOXC4     | 2.29   | 1.39  | 0.61 |
| ENSG00000002587 | HS3ST1    | 1.43   | 0.54  | 0.38 |
| ENSG00000204228 | HSD17B8   | 59.31  | 32.94 | 0.56 |
| ENSG00000155304 | HSPA13    | 26.98  | 14.05 | 0.52 |
| ENSG00000149428 | HYOU1     | 47.18  | 25.26 | 0.54 |
| ENSG00000196305 | IARS      | 24.47  | 14.11 | 0.58 |
| ENSG00000138413 | IDH1      | 103.90 | 35.52 | 0.34 |
| ENSG00000068079 | IFI35     | 10.47  | 3.42  | 0.33 |
| ENSG00000115267 | IFIH1     | 2.23   | 1.47  | 0.66 |
| ENSG00000185745 | IFIT1     | 2.33   | 0.90  | 0.38 |
| ENSG00000006652 | IFRD1     | 21.54  | 12.43 | 0.58 |
| ENSG00000119650 | IFT43     | 11.66  | 6.33  | 0.54 |
| ENSG00000197081 | IGF2R     | 66.79  | 37.87 | 0.57 |
| ENSG00000183067 | IGSF5     | 1.15   | 0.34  | 0.29 |
| ENSG00000134470 | IL15RA    | 1.06   | 0.57  | 0.54 |
| ENSG00000172458 | IL17D     | 4.01   | 2.52  | 0.63 |
| ENSG00000174564 | IL20RB    | 1.06   | 0.48  | 0.46 |
| ENSG00000132376 | INPP5K    | 6.20   | 3.34  | 0.54 |
| ENSG00000136003 | ISCU      | 32.18  | 14.69 | 0.46 |
| ENSG00000159556 | ISL2      | 2.95   | 1.21  | 0.41 |
| ENSG00000091409 | ITGA6     | 20.61  | 13.07 | 0.63 |
| ENSG00000086544 | ITPKC     | 12.22  | 7.62  | 0.62 |
| ENSG00000150995 | ITPR1     | 6.61   | 2.50  | 0.38 |
| ENSG00000077684 | PHF17     | 7.01   | 4.07  | 0.58 |
| ENSG00000188385 | JAKMIP3   | 3.50   | 2.22  | 0.63 |
| ENSG00000153814 | JAZF1     | 1.26   | 0.65  | 0.51 |
| ENSG00000140044 | JDP2      | 9.07   | 4.00  | 0.44 |

|                 |              |        |       |      |
|-----------------|--------------|--------|-------|------|
| ENSG00000161677 | JOSD2        | 13.38  | 8.15  | 0.61 |
| ENSG00000143543 | JTB          | 114.58 | 70.40 | 0.61 |
| ENSG00000026559 | KCNG1        | 1.72   | 1.13  | 0.65 |
| ENSG00000235750 | KIAA0040     | 3.96   | 1.75  | 0.44 |
| ENSG00000164659 | KIAA1324L    | 3.50   | 2.30  | 0.66 |
| ENSG00000165757 | KIAA1462     | 1.01   | 0.64  | 0.63 |
| ENSG00000102554 | KLF5         | 2.53   | 1.09  | 0.43 |
| ENSG00000162755 | KLHDC9       | 20.01  | 12.97 | 0.65 |
| ENSG00000171798 | KNDC1        | 1.79   | 0.82  | 0.46 |
| ENSG00000147592 | LACTB2       | 18.31  | 9.37  | 0.51 |
| ENSG00000053747 | LAMA3        | 29.71  | 16.95 | 0.57 |
| ENSG00000185896 | LAMP1        | 60.47  | 39.69 | 0.66 |
| ENSG00000078081 | LAMP3        | 1.38   | 0.64  | 0.47 |
| ENSG00000166173 | LARP6        | 27.27  | 12.06 | 0.44 |
| ENSG00000205629 | LCMT1        | 20.14  | 12.81 | 0.64 |
| ENSG00000148346 | LCN2         | 16.05  | 1.13  | 0.07 |
| ENSG00000136167 | LCP1         | 54.25  | 28.36 | 0.52 |
| ENSG00000166816 | LDHD         | 14.40  | 7.05  | 0.49 |
| ENSG00000205213 | LGR4         | 4.42   | 2.86  | 0.65 |
| ENSG00000183250 | C21orf67     | 3.55   | 1.87  | 0.53 |
| ENSG00000107798 | LIPA         | 12.37  | 6.39  | 0.52 |
| ENSG00000168216 | LMBRD1       | 5.55   | 3.47  | 0.63 |
| ENSG00000143013 | LMO4         | 18.02  | 8.42  | 0.47 |
| ENSG00000136944 | LMX1B        | 2.55   | 1.65  | 0.65 |
| ENSG00000206535 | LNP1         | 5.57   | 3.46  | 0.62 |
| ENSG00000232671 | RP11-126K1.2 | 3.11   | 1.79  | 0.58 |
| ENSG00000196365 | LONP1        | 43.11  | 25.45 | 0.59 |
| ENSG00000167419 | LPO          | 1.10   | 0.52  | 0.47 |
| ENSG00000197324 | LRP10        | 50.04  | 28.45 | 0.57 |
| ENSG00000079691 | LRRC16A      | 4.84   | 2.69  | 0.56 |
| ENSG00000010626 | LRRC23       | 7.26   | 4.66  | 0.64 |
| ENSG00000141294 | LRRC46       | 1.83   | 0.92  | 0.50 |
| ENSG00000108829 | LRRC59       | 100.49 | 53.07 | 0.53 |
| ENSG00000171492 | LRRC8D       | 46.39  | 17.38 | 0.37 |
| ENSG00000181817 | LSM10        | 40.60  | 25.36 | 0.62 |
| ENSG00000160886 | LY6K         | 1.01   | 0.48  | 0.48 |
| ENSG00000205707 | LYRM5        | 21.99  | 11.64 | 0.53 |
| ENSG00000163818 | LZTFL1       | 2.63   | 1.66  | 0.63 |
| ENSG00000099866 | MADCAM1      | 1.11   | 0.68  | 0.61 |



|                 |          |        |       |      |
|-----------------|----------|--------|-------|------|
| ENSG00000102316 | MAGED2   | 103.55 | 49.11 | 0.47 |
| ENSG00000187391 | MAGI2    | 1.23   | 0.77  | 0.63 |
| ENSG00000112893 | MAN2A1   | 3.85   | 2.53  | 0.66 |
| ENSG00000140941 | MAP1LC3B | 34.41  | 13.43 | 0.39 |
| ENSG00000047849 | MAP4     | 29.70  | 19.54 | 0.66 |
| ENSG00000116871 | MAP7D1   | 42.46  | 24.29 | 0.57 |
| ENSG00000069956 | MAPK6    | 93.70  | 59.88 | 0.64 |
| ENSG00000173926 | 41701    | 1.16   | 0.67  | 0.57 |
| ENSG00000116141 | MARK1    | 4.78   | 2.39  | 0.50 |
| ENSG00000166986 | MARS     | 66.96  | 28.66 | 0.43 |
| ENSG00000180398 | MCFD2    | 34.96  | 21.95 | 0.63 |
| ENSG00000140563 | MCTP2    | 2.16   | 1.32  | 0.61 |
| ENSG00000065833 | ME1      | 25.31  | 12.21 | 0.48 |
| ENSG00000156603 | MED19    | 15.56  | 9.66  | 0.62 |
| ENSG00000160563 | MED27    | 9.99   | 6.55  | 0.66 |
| ENSG00000159479 | MED8     | 16.70  | 10.87 | 0.65 |
| ENSG00000143995 | MEIS1    | 1.02   | 0.47  | 0.46 |
| ENSG00000172878 | METAP1D  | 5.41   | 3.54  | 0.65 |
| ENSG00000214756 | METTL12  | 14.23  | 9.26  | 0.65 |
| ENSG00000101574 | METTL4   | 3.36   | 2.18  | 0.65 |
| ENSG00000198948 | MFAP3L   | 3.68   | 1.93  | 0.52 |
| ENSG00000118855 | MFSD1    | 24.73  | 15.92 | 0.64 |
| ENSG00000167700 | MFSD3    | 31.85  | 19.20 | 0.60 |
| ENSG00000008394 | MGST1    | 75.30  | 48.79 | 0.65 |
| ENSG00000100139 | MICALL1  | 26.30  | 12.07 | 0.46 |
| ENSG00000165175 | MID1IP1  | 140.27 | 61.22 | 0.44 |
| ENSG00000080561 | MID2     | 9.15   | 5.55  | 0.61 |
| ENSG00000125457 | MIF4GD   | 14.57  | 7.58  | 0.52 |
| ENSG00000167965 | MLST8    | 58.72  | 32.80 | 0.56 |
| ENSG00000139428 | MMAB     | 11.78  | 7.47  | 0.63 |
| ENSG00000130675 | MNX1     | 11.64  | 4.95  | 0.43 |
| ENSG00000075643 | MOCOS    | 38.51  | 11.12 | 0.29 |
| ENSG00000164077 | MON1A    | 4.94   | 3.01  | 0.61 |
| ENSG00000171160 | MORN4    | 18.81  | 11.10 | 0.59 |
| ENSG00000073146 | MOV10L1  | 1.18   | 0.47  | 0.40 |
| ENSG00000060762 | MPC1     | 9.63   | 6.11  | 0.63 |
| ENSG00000254858 | MPV17L2  | 16.72  | 9.56  | 0.57 |
| ENSG00000153029 | MR1      | 3.98   | 2.22  | 0.56 |
| ENSG00000175110 | MRPS22   | 18.47  | 11.72 | 0.63 |

|                 |           |        |       |      |
|-----------------|-----------|--------|-------|------|
| ENSG00000147586 | MRPS28    | 22.73  | 14.30 | 0.63 |
| ENSG00000061794 | MRPS35    | 143.07 | 84.45 | 0.59 |
| ENSG00000175806 | MSRA      | 3.69   | 1.60  | 0.43 |
| ENSG00000148450 | MSRB2     | 32.32  | 21.09 | 0.65 |
| ENSG00000174099 | MSRB3     | 1.43   | 0.75  | 0.52 |
| ENSG00000163132 | MSX1      | 11.03  | 6.32  | 0.57 |
| ENSG00000120149 | MSX2      | 2.89   | 1.77  | 0.61 |
| ENSG00000125144 | MTIG      | 41.88  | 25.57 | 0.61 |
| ENSG00000168502 | SOGA2     | 2.72   | 1.63  | 0.60 |
| ENSG00000066855 | MTRF1     | 28.36  | 17.55 | 0.62 |
| ENSG00000120254 | MTHFD1L   | 13.73  | 8.59  | 0.63 |
| ENSG00000065911 | MTHFD2    | 111.69 | 45.01 | 0.40 |
| ENSG00000104643 | MTMR9     | 10.53  | 6.86  | 0.65 |
| ENSG00000172732 | MUS81     | 11.60  | 6.84  | 0.59 |
| ENSG00000074842 | C19orf10  | 57.90  | 36.89 | 0.64 |
| ENSG00000152620 | NADKD1    | 28.79  | 18.85 | 0.65 |
| ENSG00000108784 | NAGLU     | 37.01  | 22.14 | 0.60 |
| ENSG00000186462 | NAP1L2    | 10.76  | 3.59  | 0.33 |
| ENSG00000134440 | NARS      | 71.63  | 42.57 | 0.59 |
| ENSG00000020129 | NCDN      | 22.57  | 14.75 | 0.65 |
| ENSG00000124151 | NCOA3     | 7.92   | 4.79  | 0.60 |
| ENSG00000111912 | NCOA7     | 10.00  | 5.24  | 0.52 |
| ENSG00000137806 | NDUFAF1   | 15.50  | 9.82  | 0.63 |
| ENSG00000164182 | NDUFAF2   | 56.71  | 32.04 | 0.56 |
| ENSG00000109390 | NDUFC1    | 3.97   | 2.38  | 0.60 |
| ENSG00000114670 | NEK11     | 1.20   | 0.68  | 0.57 |
| ENSG00000160602 | NEK8      | 5.41   | 3.20  | 0.59 |
| ENSG00000082641 | NFE2L1    | 148.50 | 90.31 | 0.61 |
| ENSG00000169599 | NFU1      | 2.06   | 0.87  | 0.42 |
| ENSG00000101004 | NINL      | 1.67   | 0.52  | 0.31 |
| ENSG00000104361 | NIPAL2    | 8.08   | 5.00  | 0.62 |
| ENSG00000136783 | NIPSNAP3A | 57.60  | 34.37 | 0.60 |
| ENSG00000112981 | NME5      | 3.90   | 2.22  | 0.57 |
| ENSG00000141458 | NPC1      | 8.52   | 4.21  | 0.49 |
| ENSG00000181019 | NQO1      | 23.85  | 10.00 | 0.42 |
| ENSG00000025434 | NR1H3     | 6.24   | 4.01  | 0.64 |
| ENSG00000106459 | NRF1      | 19.61  | 8.14  | 0.42 |
| ENSG00000073969 | NSF       | 36.57  | 23.58 | 0.64 |
| ENSG00000070081 | NUCB2     | 22.86  | 14.81 | 0.65 |

|                 |              |        |        |      |
|-----------------|--------------|--------|--------|------|
| ENSG00000168101 | NUDT16L1     | 35.94  | 23.13  | 0.64 |
| ENSG00000176046 | NUPR1        | 284.14 | 167.66 | 0.59 |
| ENSG00000135114 | OASL         | 1.78   | 0.47   | 0.26 |
| ENSG00000065154 | OAT          | 3.35   | 1.86   | 0.56 |
| ENSG00000087263 | OGFOD1       | 22.13  | 13.18  | 0.60 |
| ENSG00000162600 | OMA1         | 9.01   | 5.82   | 0.65 |
| ENSG00000079156 | OSBPL6       | 1.70   | 0.59   | 0.35 |
| ENSG00000116885 | OSCP1        | 4.43   | 2.79   | 0.63 |
| ENSG00000140961 | OSGIN1       | 2.98   | 1.52   | 0.51 |
| ENSG00000089723 | OTUB2        | 5.32   | 2.94   | 0.55 |
| ENSG00000101104 | PABPC1L      | 21.86  | 10.97  | 0.50 |
| ENSG00000100266 | PACSIN2      | 37.74  | 23.95  | 0.63 |
| ENSG00000217930 | PAM16        | 3.49   | 2.23   | 0.64 |
| ENSG00000073150 | PANX2        | 5.52   | 2.24   | 0.41 |
| ENSG00000167081 | PBX3         | 2.92   | 1.37   | 0.47 |
| ENSG00000156453 | PCDH1        | 15.45  | 4.02   | 0.26 |
| ENSG00000100889 | PCK2         | 206.33 | 40.43  | 0.20 |
| ENSG00000156973 | PDE6D        | 3.64   | 2.11   | 0.58 |
| ENSG00000104213 | PDGFRL       | 2.18   | 0.59   | 0.27 |
| ENSG00000164494 | PDSS2        | 9.32   | 6.09   | 0.65 |
| ENSG00000198300 | PEG3         | 20.67  | 12.04  | 0.58 |
| ENSG00000124299 | PEPD         | 4.16   | 2.61   | 0.63 |
| ENSG00000157911 | PEX10        | 44.42  | 23.60  | 0.53 |
| ENSG00000162928 | PEX13        | 16.71  | 10.62  | 0.64 |
| ENSG00000092621 | PHGDH        | 202.48 | 101.92 | 0.50 |
| ENSG00000008710 | PKD1         | 10.85  | 7.14   | 0.66 |
| ENSG00000135549 | PKIB         | 14.75  | 9.04   | 0.61 |
| ENSG00000165495 | PKNOX2       | 4.02   | 1.27   | 0.32 |
| ENSG00000168907 | PLA2G4F      | 5.85   | 3.49   | 0.60 |
| ENSG00000170965 | PLAC1        | 1.48   | 0.22   | 0.15 |
| ENSG00000187091 | PLCD1        | 1.94   | 1.16   | 0.60 |
| ENSG00000115762 | PLEKHB2      | 46.45  | 30.59  | 0.66 |
| ENSG00000152527 | PLEKHH2      | 1.18   | 0.55   | 0.47 |
| ENSG00000120594 | PLXDC2       | 5.74   | 3.24   | 0.56 |
| ENSG00000141682 | PMAIP1       | 19.25  | 11.89  | 0.62 |
| ENSG00000013503 | POLR3B       | 14.31  | 8.39   | 0.59 |
| ENSG00000188242 | CTD-2228K2.5 | 26.71  | 16.56  | 0.62 |
| ENSG00000112033 | PPARD        | 11.05  | 7.22   | 0.65 |
| ENSG00000168938 | PPIC         | 9.17   | 4.13   | 0.45 |

|                 |          |        |        |      |
|-----------------|----------|--------|--------|------|
| ENSG00000164088 | PPM1M    | 6.57   | 3.09   | 0.47 |
| ENSG00000066027 | PPP2R5A  | 20.08  | 11.91  | 0.59 |
| ENSG00000126432 | PRDX5    | 457.53 | 273.14 | 0.60 |
| ENSG00000138078 | PREPL    | 10.30  | 5.32   | 0.52 |
| ENSG00000005249 | PRKAR2B  | 13.14  | 6.78   | 0.52 |
| ENSG00000184500 | PROS1    | 2.30   | 1.29   | 0.56 |
| ENSG00000148426 | C10orf47 | 9.40   | 5.88   | 0.63 |
| ENSG00000205352 | PRR13    | 38.17  | 24.86  | 0.65 |
| ENSG00000204983 | PRSS1    | 6.94   | 1.66   | 0.24 |
| ENSG00000112812 | PRSS16   | 9.71   | 6.17   | 0.64 |
| ENSG00000010438 | PRSS3    | 1.08   | 0.44   | 0.41 |
| ENSG00000135069 | PSAT1    | 439.75 | 113.42 | 0.26 |
| ENSG00000161057 | PSMC2    | 50.71  | 31.59  | 0.62 |
| ENSG00000146733 | PSPH     | 38.86  | 14.23  | 0.37 |
| ENSG00000165983 | PTER     | 15.82  | 9.66   | 0.61 |
| ENSG00000184007 | PTP4A2   | 37.15  | 23.78  | 0.64 |
| ENSG00000158079 | PTPDC1   | 15.84  | 6.00   | 0.38 |
| ENSG00000163629 | PTPN13   | 9.12   | 5.31   | 0.58 |
| ENSG00000070778 | PTPN21   | 2.76   | 1.43   | 0.52 |
| ENSG00000187024 | PTRH1    | 2.08   | 1.32   | 0.64 |
| ENSG00000150787 | PTS      | 25.74  | 16.01  | 0.62 |
| ENSG00000185129 | PURA     | 8.41   | 5.20   | 0.62 |
| ENSG00000168297 | PXK      | 6.35   | 3.85   | 0.61 |
| ENSG00000183010 | PYCR1    | 117.57 | 74.20  | 0.63 |
| ENSG00000170473 | WIBG     | 30.03  | 19.32  | 0.64 |
| ENSG00000116260 | QSOX1    | 46.07  | 26.32  | 0.57 |
| ENSG00000169228 | RAB24    | 9.83   | 6.30   | 0.64 |
| ENSG00000172007 | RAB33B   | 4.33   | 2.18   | 0.50 |
| ENSG00000172794 | RAB37    | 1.39   | 0.81   | 0.58 |
| ENSG00000167994 | RAB3IL1  | 3.69   | 2.24   | 0.61 |
| ENSG00000172780 | RAB43    | 24.54  | 14.77  | 0.60 |
| ENSG00000171570 | RAB4B    | 28.70  | 16.25  | 0.57 |
| ENSG00000105404 | RABAC1   | 10.97  | 5.66   | 0.52 |
| ENSG00000154710 | RABGEF1  | 14.08  | 8.61   | 0.61 |
| ENSG00000155918 | RAET1L   | 2.80   | 1.53   | 0.55 |
| ENSG00000184672 | RALYL    | 1.17   | 0.50   | 0.42 |
| ENSG00000123728 | RAP2C    | 7.40   | 4.86   | 0.66 |
| ENSG00000173166 | RAPH1    | 5.67   | 2.67   | 0.47 |
| ENSG00000125826 | RBCK1    | 139.76 | 62.58  | 0.45 |

|                 |              |        |        |      |
|-----------------|--------------|--------|--------|------|
| ENSG00000171174 | RBKS         | 1.31   | 0.70   | 0.53 |
| ENSG00000112183 | RBM24        | 24.40  | 11.54  | 0.47 |
| ENSG00000155636 | RBM45        | 4.25   | 2.24   | 0.53 |
| ENSG00000121039 | RDH10        | 5.08   | 2.62   | 0.52 |
| ENSG00000072042 | RDH11        | 120.08 | 71.19  | 0.59 |
| ENSG00000104856 | RELB         | 1.28   | 0.72   | 0.56 |
| ENSG00000189056 | RELN         | 2.62   | 0.98   | 0.37 |
| ENSG00000139890 | REM2         | 1.77   | 1.14   | 0.65 |
| ENSG00000042445 | RETSAT       | 28.93  | 14.45  | 0.50 |
| ENSG00000076043 | REXO2        | 42.62  | 26.72  | 0.63 |
| ENSG00000175449 | RFESD        | 1.06   | 0.40   | 0.38 |
| ENSG00000144468 | RHBDD1       | 11.07  | 5.52   | 0.50 |
| ENSG00000100263 | RHBDD3       | 14.98  | 9.88   | 0.66 |
| ENSG00000079841 | RIMS1        | 3.59   | 2.25   | 0.63 |
| ENSG00000249884 | RNF103-CHMP3 | 17.82  | 11.18  | 0.63 |
| ENSG00000137393 | RNF144B      | 7.48   | 3.30   | 0.44 |
| ENSG00000168159 | RNF187       | 383.82 | 188.93 | 0.49 |
| ENSG00000163481 | RNF25        | 5.37   | 3.55   | 0.66 |
| ENSG00000105982 | RNF32        | 2.09   | 1.29   | 0.62 |
| ENSG00000181852 | RNF41        | 58.46  | 29.65  | 0.51 |
| ENSG00000189050 | RNFT1        | 3.35   | 2.09   | 0.62 |
| ENSG00000067836 | ROGDI        | 13.93  | 9.01   | 0.65 |
| ENSG00000185483 | ROR1         | 3.16   | 1.37   | 0.43 |
| ENSG00000124787 | RPP40        | 5.89   | 3.21   | 0.55 |
| ENSG00000156990 | RPUSD3       | 7.42   | 4.60   | 0.62 |
| ENSG00000137996 | RTCA         | 35.92  | 22.84  | 0.64 |
| ENSG00000115310 | RTN4         | 49.19  | 31.49  | 0.64 |
| ENSG00000156253 | RWDD2B       | 7.59   | 4.93   | 0.65 |
| ENSG00000189334 | S100A14      | 1.37   | 0.79   | 0.57 |
| ENSG00000163993 | S100P        | 200.60 | 13.20  | 0.07 |
| ENSG00000031698 | SARS         | 194.54 | 84.79  | 0.44 |
| ENSG00000092108 | SCFD1        | 16.22  | 9.90   | 0.61 |
| ENSG00000121064 | SCPEP1       | 18.89  | 12.19  | 0.65 |
| ENSG00000128228 | SDF2L1       | 75.59  | 48.38  | 0.64 |
| ENSG00000139410 | SDSL         | 32.49  | 9.43   | 0.29 |
| ENSG00000166562 | SEC11C       | 46.66  | 29.15  | 0.62 |
| ENSG00000150961 | SEC24D       | 6.16   | 2.97   | 0.48 |
| ENSG00000106803 | SEC61B       | 292.65 | 193.02 | 0.66 |
| ENSG00000091490 | SEL1L3       | 20.89  | 8.44   | 0.40 |

|                 |          |        |       |      |
|-----------------|----------|--------|-------|------|
| ENSG00000143416 | SELENBP1 | 49.57  | 29.04 | 0.59 |
| ENSG00000135622 | SEMA4F   | 3.82   | 2.43  | 0.64 |
| ENSG00000166192 | SENP8    | 4.92   | 3.00  | 0.61 |
| ENSG00000179918 | SEPHS2   | 160.92 | 64.95 | 0.40 |
| ENSG00000120742 | SERP1    | 94.03  | 61.86 | 0.66 |
| ENSG00000196136 | SERPINA3 | 2.17   | 0.33  | 0.15 |
| ENSG00000166401 | SERPINB8 | 2.15   | 1.19  | 0.55 |
| ENSG00000166224 | SGPL1    | 40.03  | 22.52 | 0.56 |
| ENSG00000197860 | SGTB     | 6.85   | 3.92  | 0.57 |
| ENSG00000185437 | SH3BGR   | 10.52  | 2.89  | 0.27 |
| ENSG00000147010 | SH3KBP1  | 2.90   | 1.57  | 0.54 |
| ENSG00000125089 | SH3TC1   | 1.76   | 1.12  | 0.64 |
| ENSG00000196470 | SIAH1    | 13.93  | 6.80  | 0.49 |
| ENSG00000165449 | SLC16A9  | 5.70   | 3.24  | 0.57 |
| ENSG00000115902 | SLC1A4   | 13.02  | 4.42  | 0.34 |
| ENSG00000105281 | SLC1A5   | 105.95 | 32.03 | 0.30 |
| ENSG00000146477 | SLC22A3  | 56.35  | 31.00 | 0.55 |
| ENSG00000178537 | SLC25A20 | 10.98  | 4.50  | 0.41 |
| ENSG00000136868 | SLC31A1  | 92.22  | 34.73 | 0.38 |
| ENSG00000164414 | SLC35A1  | 3.45   | 1.75  | 0.51 |
| ENSG00000102100 | SLC35A2  | 23.70  | 13.84 | 0.58 |
| ENSG00000213699 | C2orf18  | 30.61  | 18.54 | 0.61 |
| ENSG00000176273 | SLC35G1  | 3.44   | 1.93  | 0.56 |
| ENSG00000157637 | SLC38A10 | 23.15  | 14.57 | 0.63 |
| ENSG00000141873 | SLC39A3  | 22.84  | 15.06 | 0.66 |
| ENSG00000112473 | SLC39A7  | 134.36 | 79.45 | 0.59 |
| ENSG00000168003 | SLC3A2   | 107.37 | 47.84 | 0.45 |
| ENSG00000167703 | SLC43A2  | 8.17   | 3.84  | 0.47 |
| ENSG00000158715 | SLC45A3  | 122.83 | 74.23 | 0.60 |
| ENSG00000211584 | SLC48A1  | 11.78  | 6.79  | 0.58 |
| ENSG00000088836 | SLC4A11  | 1.07   | 0.43  | 0.41 |
| ENSG00000196517 | SLC6A9   | 16.86  | 3.37  | 0.20 |
| ENSG00000139514 | SLC7A1   | 88.53  | 50.30 | 0.57 |
| ENSG00000151012 | SLC7A11  | 65.83  | 18.28 | 0.28 |
| ENSG00000103257 | SLC7A5   | 66.63  | 19.30 | 0.29 |
| ENSG00000090020 | SLC9A1   | 17.28  | 10.22 | 0.59 |
| ENSG00000197818 | SLC9A8   | 9.87   | 5.32  | 0.54 |
| ENSG00000170365 | SMAD1    | 6.65   | 4.21  | 0.63 |
| ENSG00000224531 | C6orf228 | 19.93  | 12.55 | 0.63 |

|                 |          |        |        |      |
|-----------------|----------|--------|--------|------|
| ENSG00000163683 | C4orf34  | 40.59  | 21.19  | 0.52 |
| ENSG00000250317 | C4orf52  | 50.20  | 31.55  | 0.63 |
| ENSG00000088826 | SMOX     | 8.37   | 2.80   | 0.33 |
| ENSG00000166311 | SMPD1    | 33.33  | 19.08  | 0.57 |
| ENSG00000135587 | SMPD2    | 15.00  | 9.69   | 0.65 |
| ENSG00000019549 | SNAI2    | 1.52   | 0.67   | 0.44 |
| ENSG00000174446 | SNAPC5   | 19.84  | 12.66  | 0.64 |
| ENSG00000128739 | SNRPN    | 16.75  | 11.02  | 0.66 |
| ENSG00000002919 | SNX11    | 12.33  | 7.77   | 0.63 |
| ENSG00000064652 | SNX24    | 3.60   | 1.70   | 0.47 |
| ENSG00000112320 | SOBP     | 1.97   | 1.00   | 0.51 |
| ENSG00000120669 | SOHLH2   | 12.09  | 7.91   | 0.65 |
| ENSG00000137642 | SORL1    | 5.97   | 3.01   | 0.50 |
| ENSG00000104450 | SPAG1    | 4.99   | 2.35   | 0.47 |
| ENSG00000134278 | SPIRE1   | 15.31  | 8.67   | 0.57 |
| ENSG00000167778 | SPRYD3   | 21.04  | 12.51  | 0.59 |
| ENSG00000161011 | SQSTM1   | 85.07  | 55.84  | 0.66 |
| ENSG00000174780 | SRP72    | 83.62  | 54.59  | 0.65 |
| ENSG00000182934 | SRPR     | 49.16  | 30.69  | 0.62 |
| ENSG00000144867 | SRPRB    | 56.42  | 32.95  | 0.58 |
| ENSG00000114850 | SSR3     | 87.37  | 49.35  | 0.56 |
| ENSG00000138134 | STAMBPL1 | 1.65   | 0.96   | 0.58 |
| ENSG00000072786 | STK10    | 1.53   | 0.90   | 0.59 |
| ENSG00000144589 | STK11IP  | 3.46   | 2.14   | 0.62 |
| ENSG00000081320 | STK17B   | 9.65   | 5.16   | 0.54 |
| ENSG00000169302 | STK32A   | 1.28   | 0.54   | 0.42 |
| ENSG00000196182 | STK40    | 23.01  | 11.86  | 0.52 |
| ENSG00000162236 | STX5     | 17.26  | 10.75  | 0.62 |
| ENSG00000166263 | STXBP4   | 3.16   | 1.96   | 0.62 |
| ENSG00000164506 | STXBP5   | 4.45   | 2.73   | 0.61 |
| ENSG00000129103 | SUMF2    | 74.67  | 42.81  | 0.57 |
| ENSG00000148291 | SURF2    | 36.39  | 20.16  | 0.55 |
| ENSG00000148248 | SURF4    | 157.88 | 103.78 | 0.66 |
| ENSG00000197321 | SVIL     | 3.52   | 1.56   | 0.44 |
| ENSG00000175854 | SWI5     | 28.42  | 17.74  | 0.62 |
| ENSG00000138162 | TACC2    | 15.76  | 7.06   | 0.45 |
| ENSG00000136463 | TACO1    | 43.62  | 28.66  | 0.66 |
| ENSG00000197780 | TAF13    | 38.21  | 24.35  | 0.64 |
| ENSG00000187325 | TAF9B    | 24.57  | 13.97  | 0.57 |

|                 |          |        |       |      |
|-----------------|----------|--------|-------|------|
| ENSG00000204267 | TAP2     | 8.20   | 4.47  | 0.55 |
| ENSG00000113407 | TARS     | 83.60  | 51.66 | 0.62 |
| ENSG00000095383 | TBC1D2   | 1.32   | 0.76  | 0.57 |
| ENSG00000136111 | TBC1D4   | 12.51  | 7.22  | 0.58 |
| ENSG00000154144 | TBRG1    | 37.18  | 18.35 | 0.49 |
| ENSG00000187735 | TCEA1    | 62.29  | 34.99 | 0.56 |
| ENSG00000196116 | TDRD7    | 4.00   | 2.59  | 0.65 |
| ENSG00000166848 | TERF2IP  | 60.08  | 34.74 | 0.58 |
| ENSG00000135269 | TES      | 47.68  | 30.13 | 0.63 |
| ENSG00000088992 | TESC     | 1.06   | 0.68  | 0.65 |
| ENSG00000068323 | TFE3     | 24.87  | 14.29 | 0.57 |
| ENSG00000092295 | TGM1     | 2.39   | 0.57  | 0.24 |
| ENSG00000113272 | THG1L    | 7.48   | 4.58  | 0.61 |
| ENSG00000078237 | C12orf5  | 13.74  | 8.45  | 0.62 |
| ENSG00000104980 | TIMM44   | 13.16  | 6.85  | 0.52 |
| ENSG00000143155 | TIPRL    | 53.60  | 31.95 | 0.60 |
| ENSG00000149809 | TM7SF2   | 74.36  | 46.17 | 0.62 |
| ENSG00000150403 | TMCO3    | 95.54  | 46.17 | 0.48 |
| ENSG00000170006 | TMEM154  | 2.43   | 1.30  | 0.54 |
| ENSG00000168701 | TMEM208  | 49.10  | 30.68 | 0.62 |
| ENSG00000169964 | TMEM42   | 22.74  | 14.36 | 0.63 |
| ENSG00000103978 | TMEM87A  | 16.40  | 10.64 | 0.65 |
| ENSG00000167920 | TMEM99   | 24.64  | 15.05 | 0.61 |
| ENSG00000067182 | TNFRSF1A | 21.22  | 11.87 | 0.56 |
| ENSG00000117586 | TNFSF4   | 2.24   | 1.18  | 0.53 |
| ENSG00000111907 | TPD52L1  | 17.25  | 6.84  | 0.40 |
| ENSG00000141933 | TPGS1    | 10.60  | 6.79  | 0.64 |
| ENSG00000166340 | TPP1     | 28.66  | 18.39 | 0.64 |
| ENSG00000102871 | TRADD    | 11.79  | 6.95  | 0.59 |
| ENSG00000167515 | TRAPPC2L | 11.78  | 7.24  | 0.61 |
| ENSG00000182400 | TRAPPC6B | 10.44  | 6.62  | 0.63 |
| ENSG00000101255 | TRIB3    | 234.09 | 59.59 | 0.25 |
| ENSG00000154370 | TRIM11   | 15.00  | 9.45  | 0.63 |
| ENSG00000221926 | TRIM16   | 12.47  | 7.92  | 0.64 |
| ENSG00000136932 | C9orf156 | 5.12   | 3.32  | 0.65 |
| ENSG00000163467 | TSACC    | 3.64   | 1.96  | 0.54 |
| ENSG00000157514 | TSC22D3  | 55.22  | 19.69 | 0.36 |
| ENSG00000198860 | TSEN15   | 40.15  | 21.93 | 0.55 |
| ENSG00000106537 | TSPAN13  | 131.66 | 81.77 | 0.62 |



|                 |          |        |       |      |
|-----------------|----------|--------|-------|------|
| ENSG00000048140 | TSPAN17  | 18.35  | 11.47 | 0.63 |
| ENSG00000258992 | TSPY1    | 2.21   | 1.44  | 0.65 |
| ENSG00000032389 | TSSC1    | 3.86   | 2.52  | 0.65 |
| ENSG00000113312 | TTC1     | 49.78  | 29.97 | 0.60 |
| ENSG00000018699 | TTC27    | 11.38  | 6.71  | 0.59 |
| ENSG00000172425 | TTC36    | 4.80   | 3.11  | 0.65 |
| ENSG00000155158 | TTC39B   | 4.30   | 1.66  | 0.39 |
| ENSG00000100271 | TTLL1    | 4.83   | 2.88  | 0.60 |
| ENSG00000074935 | TUBE1    | 4.01   | 2.60  | 0.65 |
| ENSG00000247596 | TWF2     | 22.86  | 14.37 | 0.63 |
| ENSG00000115514 | TXNDC9   | 6.65   | 4.11  | 0.62 |
| ENSG00000025708 | TYMP     | 4.80   | 3.02  | 0.63 |
| ENSG00000161265 | U2AF1L4  | 4.32   | 2.21  | 0.51 |
| ENSG00000118939 | UCHL3    | 43.53  | 18.28 | 0.42 |
| ENSG00000109814 | UGDH     | 19.98  | 11.17 | 0.56 |
| ENSG00000135226 | UGT2B28  | 5.60   | 3.53  | 0.63 |
| ENSG00000065060 | UHRF1BP1 | 21.89  | 12.86 | 0.59 |
| ENSG00000107731 | UNC5B    | 1.60   | 1.04  | 0.65 |
| ENSG00000183696 | UPP1     | 4.88   | 1.41  | 0.29 |
| ENSG00000126088 | UROD     | 27.96  | 17.96 | 0.64 |
| ENSG00000168899 | VAMP5    | 1.25   | 0.68  | 0.55 |
| ENSG00000128218 | VPREB3   | 2.97   | 1.79  | 0.60 |
| ENSG00000139719 | VPS33A   | 5.37   | 3.50  | 0.65 |
| ENSG00000140105 | WARS     | 40.34  | 13.22 | 0.33 |
| ENSG00000139668 | WDFY2    | 3.90   | 2.50  | 0.64 |
| ENSG00000065268 | WDR18    | 34.62  | 22.05 | 0.64 |
| ENSG00000176473 | WDR25    | 3.69   | 2.34  | 0.63 |
| ENSG00000196998 | WDR45    | 6.98   | 3.71  | 0.53 |
| ENSG00000135925 | WNT10A   | 3.64   | 2.12  | 0.58 |
| ENSG00000151718 | WWC2     | 1.01   | 0.55  | 0.55 |
| ENSG00000186153 | WWOX     | 2.92   | 1.85  | 0.63 |
| ENSG00000198373 | WWP2     | 18.04  | 10.32 | 0.57 |
| ENSG00000100219 | XBP1     | 128.64 | 59.28 | 0.46 |
| ENSG00000184575 | XPOT     | 141.60 | 80.52 | 0.57 |
| ENSG00000134684 | YARS     | 28.94  | 12.03 | 0.42 |
| ENSG00000166913 | YWHAB    | 154.54 | 98.85 | 0.64 |
| ENSG00000104219 | ZDHHC2   | 8.57   | 5.53  | 0.64 |
| ENSG00000174165 | ZDHHC24  | 19.74  | 12.28 | 0.62 |
| ENSG00000104231 | ZFAND1   | 26.27  | 17.16 | 0.65 |

|                 |               |        |       |      |
|-----------------|---------------|--------|-------|------|
| ENSG00000156639 | ZFAND3        | 59.65  | 33.65 | 0.56 |
| ENSG00000220201 | ZGLP1         | 1.57   | 0.98  | 0.63 |
| ENSG00000066185 | ZMYND12       | 2.58   | 1.67  | 0.65 |
| ENSG00000147394 | ZNF185        | 1.91   | 0.85  | 0.45 |
| ENSG00000085644 | ZNF213        | 9.81   | 5.80  | 0.59 |
| ENSG00000159915 | ZNF233        | 1.94   | 1.04  | 0.54 |
| ENSG00000138311 | ZNF365        | 1.05   | 0.44  | 0.42 |
| ENSG00000105136 | ZNF419        | 18.57  | 8.51  | 0.46 |
| ENSG00000268107 | AC003005.4    | 5.30   | 3.05  | 0.58 |
| ENSG00000198342 | ZNF442        | 1.44   | 0.95  | 0.66 |
| ENSG00000180035 | ZNF48         | 4.18   | 2.75  | 0.66 |
| ENSG00000083814 | ZNF671        | 3.91   | 2.30  | 0.59 |
| ENSG00000152439 | ZNF773        | 4.78   | 2.98  | 0.62 |
| ENSG00000223547 | ZNF844        | 10.12  | 6.28  | 0.62 |
| ENSG00000174276 | ZNHIT2        | 34.73  | 21.21 | 0.61 |
| ENSG00000170044 | ZPLD1         | 1.66   | 0.18  | 0.11 |
| ENSG00000117289 | TXNIP         | 158.42 | 5.85  | 0.04 |
| ENSG00000136653 | RASSF5        | 4.96   | 3.04  | 0.61 |
| ENSG00000182217 | HIST2H4B      | 35.73  | 8.76  | 0.25 |
| ENSG00000183941 | HIST2H4A      | 79.94  | 25.95 | 0.32 |
| ENSG00000258466 | RP11-1012A1.4 | 48.10  | 26.02 | 0.54 |
| ENSG00000258941 | MIA2          | 16.74  | 5.94  | 0.35 |
| ENSG00000205456 | TP53TG3       | 1.04   | 0.59  | 0.57 |
| ENSG00000161326 | DUSP14        | 38.11  | 22.24 | 0.58 |
| ENSG00000267618 | RAD51L3-RFFL  | 7.97   | 4.67  | 0.59 |
| ENSG00000167807 | FDX1L         | 7.94   | 4.90  | 0.62 |
| ENSG00000258674 | YJEFN3        | 1.76   | 0.95  | 0.54 |
| ENSG00000268434 | AC011530.4    | 1.38   | 0.79  | 0.57 |
| ENSG00000234949 | AC104667.3    | 10.13  | 4.82  | 0.48 |
| ENSG00000247121 | CTD-2260A17.2 | 3.03   | 1.96  | 0.65 |
| ENSG00000234432 | AC092171.1    | 12.03  | 5.67  | 0.47 |
| ENSG00000255046 | RP11-297N6.4  | 1.78   | 1.08  | 0.61 |
| ENSG00000185554 | NXF2          | 16.29  | 8.12  | 0.50 |

**Supplementary Table S4: HypoxiaXshREST down M**

| Gene ID         | Gene Symbol | LNCaP-shREST |       |       | Fold change |      |
|-----------------|-------------|--------------|-------|-------|-------------|------|
|                 |             | 0 day        | 3 day | 6 day | 3/0         | 6/0  |
| ENSG00000157911 | PEX10       | 69.68        | 37.98 | 41.78 | 0.55        | 0.60 |
| ENSG00000165644 | COMTD1      | 14.60        | 8.94  | 9.80  | 0.61        | 0.67 |
| ENSG00000176273 | SLC35G1     | 3.78         | 2.58  | 2.29  | 0.68        | 0.61 |
| ENSG00000246705 | H2AFJ       | 4.70         | 2.68  | 3.36  | 0.57        | 0.71 |
| ENSG00000102554 | KLF5        | 2.43         | 2.22  | 1.51  | 0.91        | 0.62 |
| ENSG00000100867 | DHRS2       | 4.17         | 0.45  | 0.49  | 0.11        | 0.12 |
| ENSG00000168907 | PLA2G4F     | 11.49        | 4.48  | 6.15  | 0.39        | 0.54 |
| ENSG00000103257 | SLC7A5      | 33.10        | 21.45 | 23.44 | 0.65        | 0.71 |
| ENSG00000140961 | OSGIN1      | 1.73         | 0.96  | 1.24  | 0.55        | 0.72 |
| ENSG00000181019 | NQO1        | 24.03        | 11.81 | 12.56 | 0.49        | 0.52 |
| ENSG00000108829 | LRRC59      | 53.39        | 32.58 | 31.89 | 0.61        | 0.60 |
| ENSG00000042753 | AP2S1       | 72.32        | 38.13 | 40.63 | 0.53        | 0.56 |
| ENSG00000254858 | MPV17L2     | 13.28        | 8.75  | 9.08  | 0.66        | 0.68 |
| ENSG00000064601 | CTSA        | 9.70         | 5.62  | 7.54  | 0.58        | 0.78 |
| ENSG00000128228 | SDF2L1      | 51.78        | 19.30 | 24.63 | 0.37        | 0.48 |
| ENSG00000145088 | EAF2        | 4.55         | 1.12  | 1.12  | 0.25        | 0.25 |
| ENSG00000206535 | LNP1        | 1.87         | 1.20  | 1.48  | 0.64        | 0.79 |
| ENSG00000164182 | NDUFAF2     | 40.38        | 31.55 | 26.13 | 0.78        | 0.65 |
| ENSG00000124635 | HIST1H2BJ   | 27.64        | 4.93  | 8.72  | 0.18        | 0.32 |
| ENSG00000086289 | EPDR1       | 2.26         | 1.49  | 1.98  | 0.66        | 0.88 |
| ENSG00000127955 | GNAI1       | 2.64         | 3.00  | 1.44  | 1.14        | 0.55 |
| ENSG00000147586 | MRPS28      | 32.72        | 21.48 | 21.88 | 0.66        | 0.67 |
| ENSG00000235173 | FAM203A     | 8.50         | 5.52  | 6.74  | 0.65        | 0.79 |
| ENSG00000101986 | ABCD1       | 16.04        | 9.21  | 11.54 | 0.57        | 0.72 |
| ENSG00000184831 | APOO        | 36.71        | 23.68 | 24.88 | 0.65        | 0.68 |
